# Supplementary material
Source: PubMed Central journal article supplement (PMC5497682)

**Supporting Information**

**Templated oligosaccharide synthesis: driving forces and mechanistic aspects**

Xiao G. Jia, Papapida Pornsuriyasak, and Alexei V. Demchenko\*

Department of Chemistry and Biochemistry, University of Missouri – St. Louis, One University  
Boulevard, St. Louis, Missouri 63121, USA

# NMR Spectra

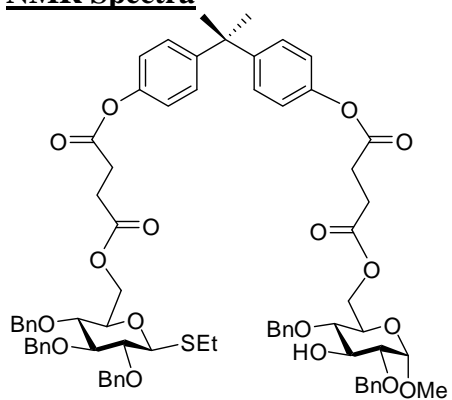

7

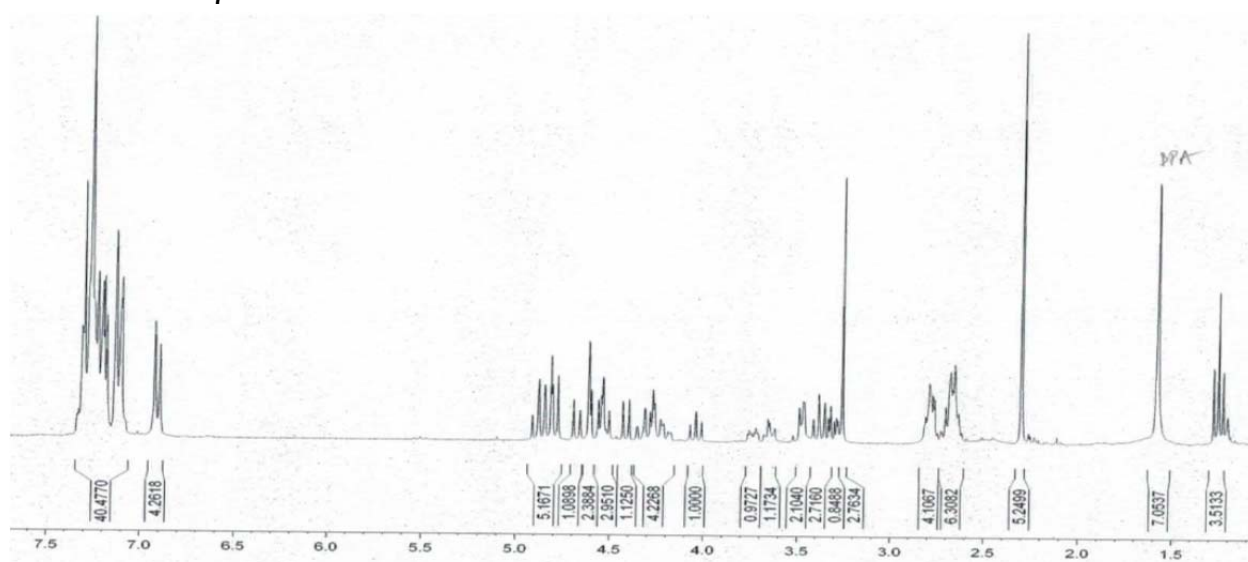

CDCl<sub>3</sub> at 300 MHz

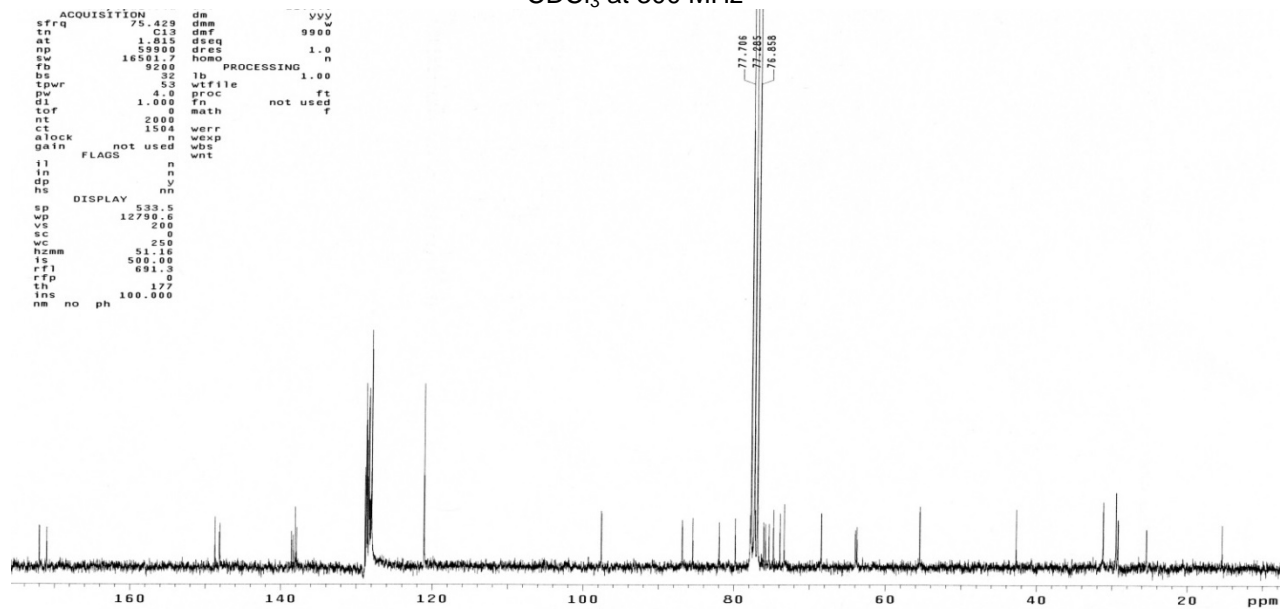

CDCl<sub>3</sub> at 75 MHz



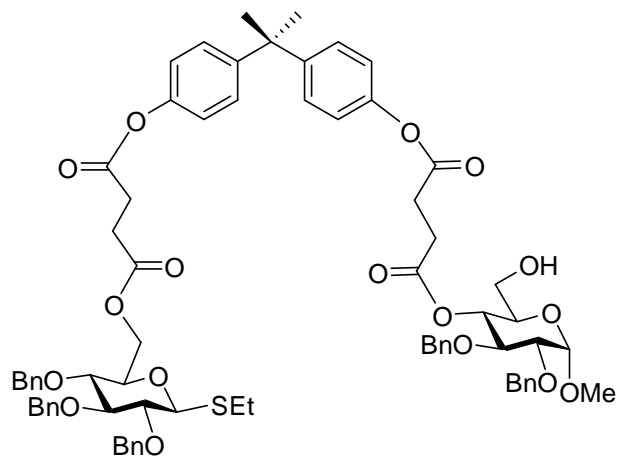

9

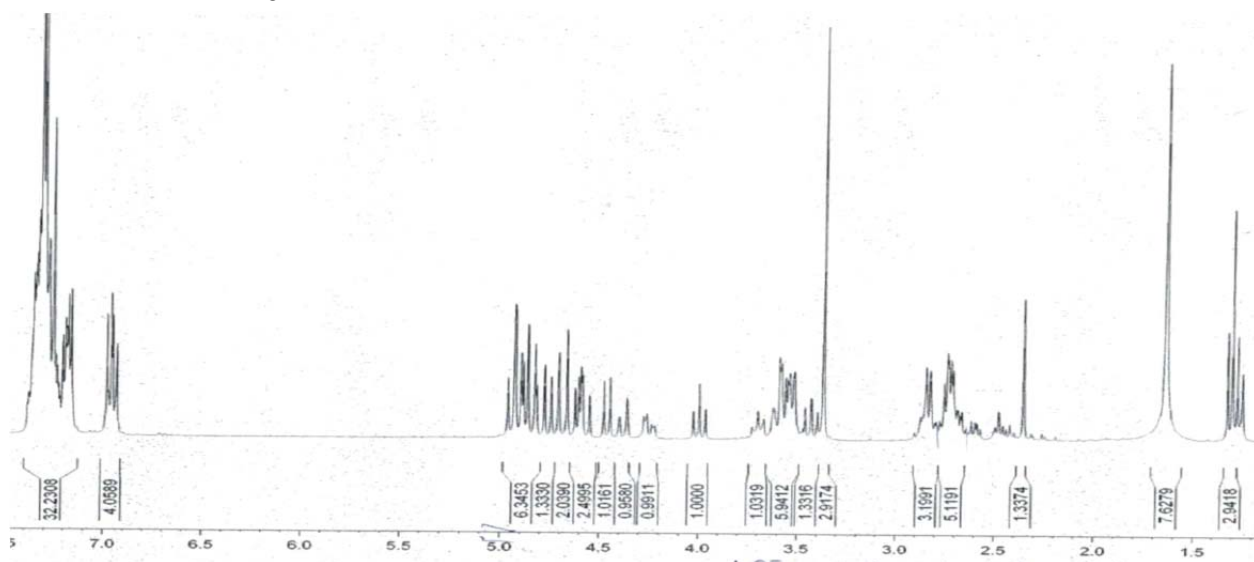

$\text{CDCl}_3$  at 300 MHz

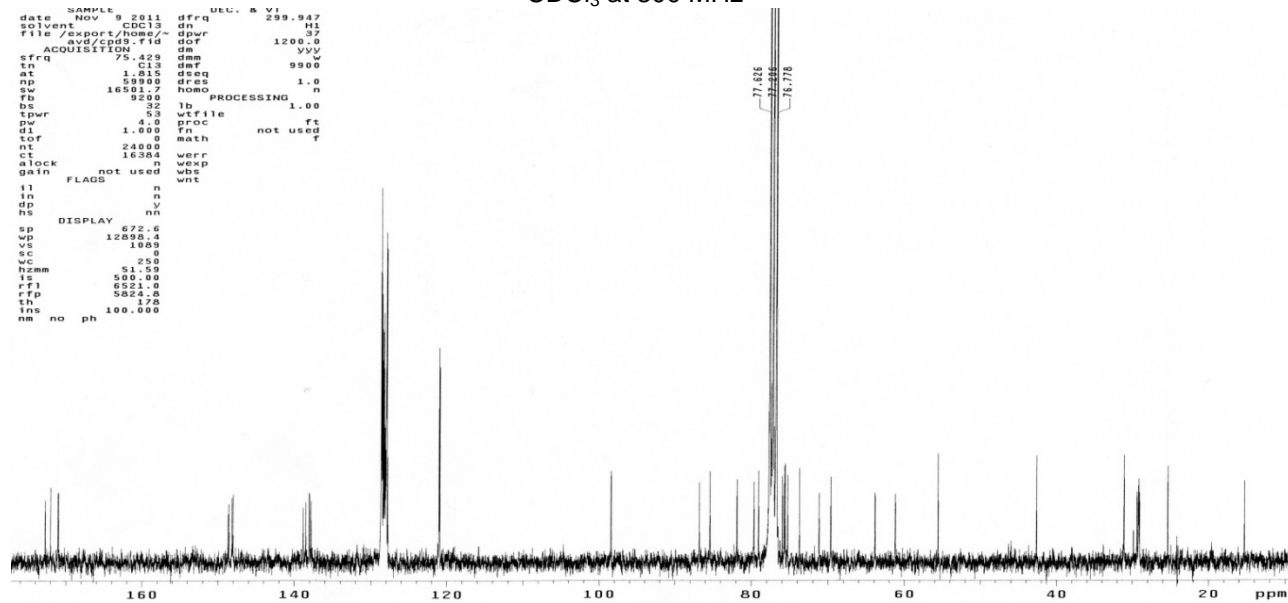

$\text{CDCl}_3$  at 75 MHz

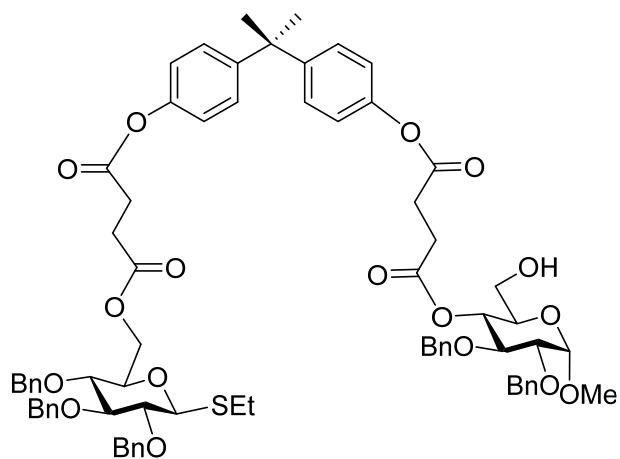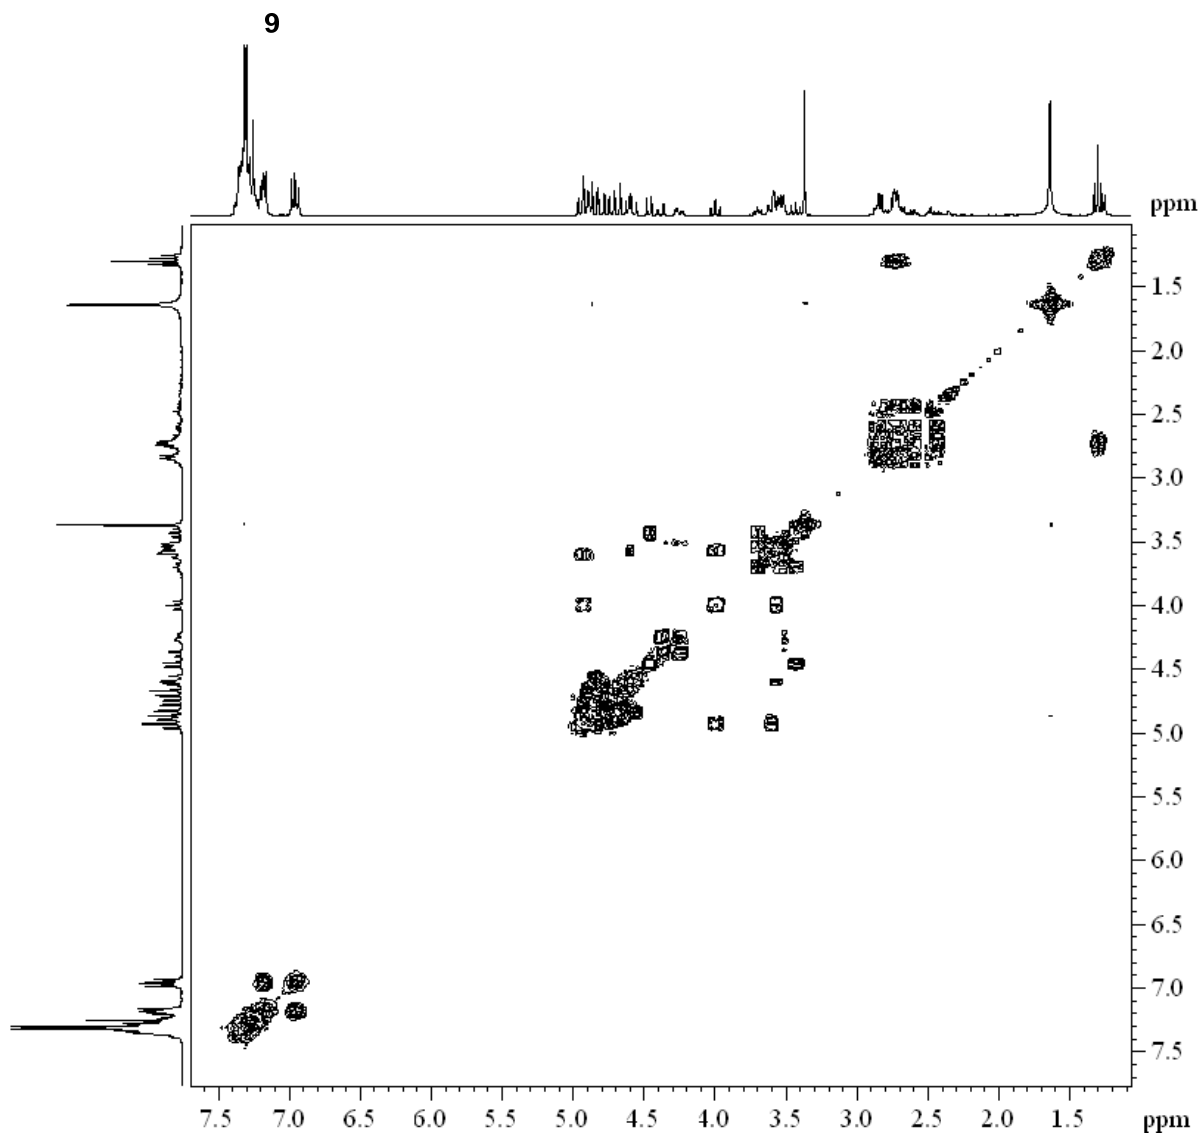

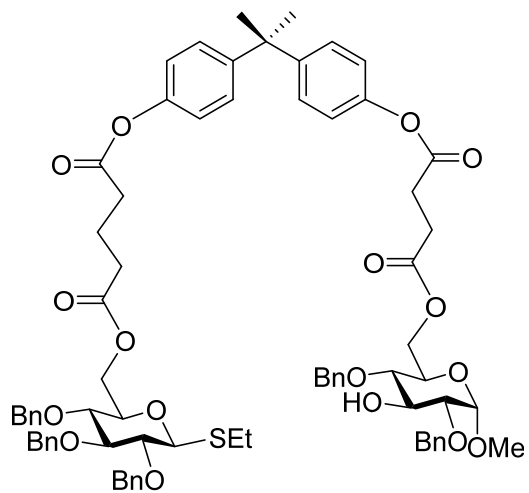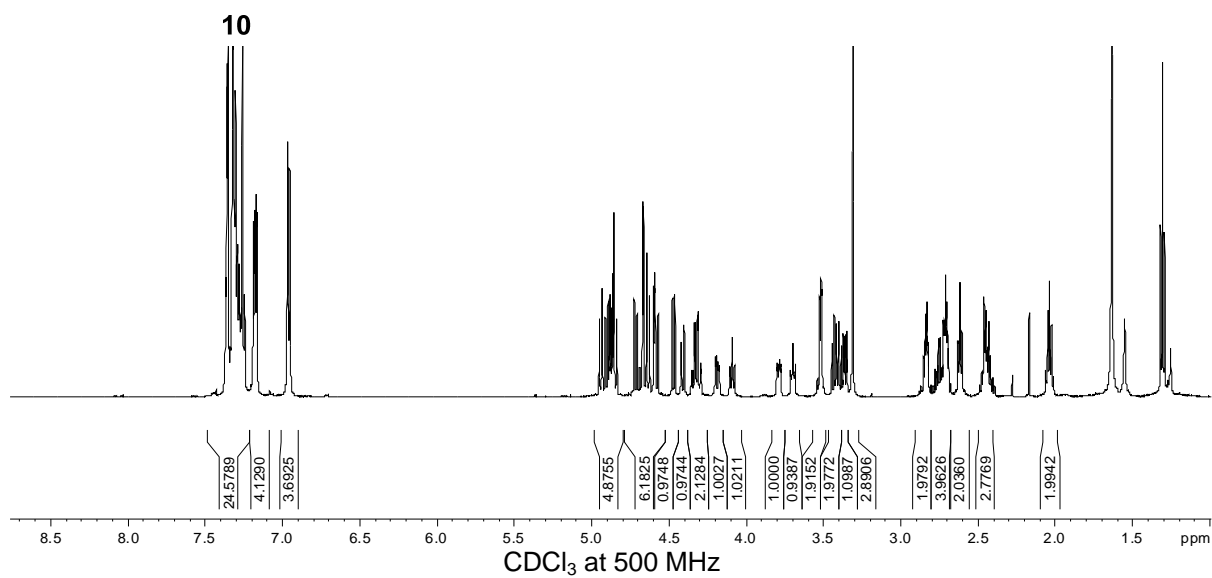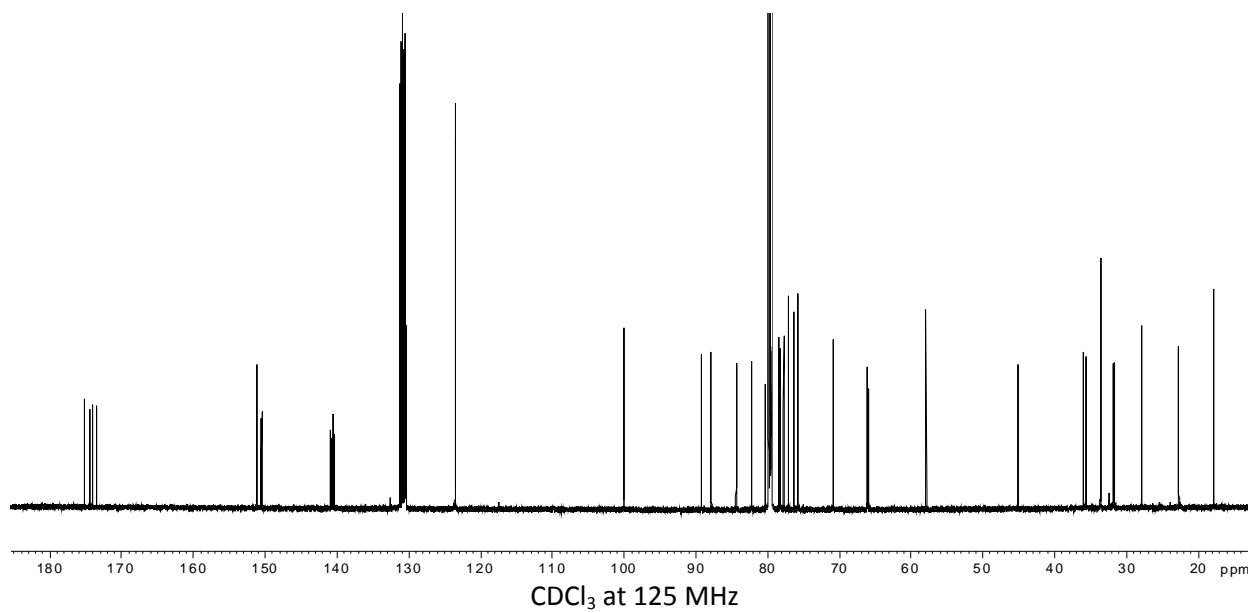

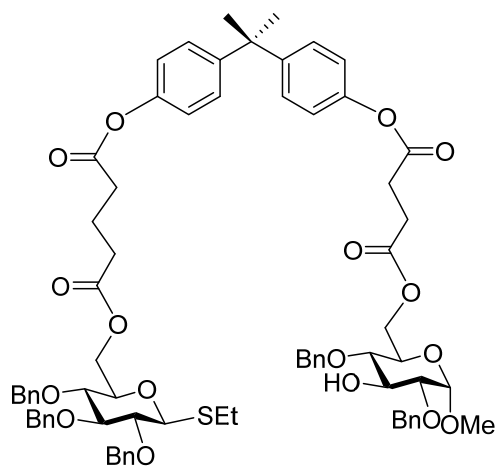

10

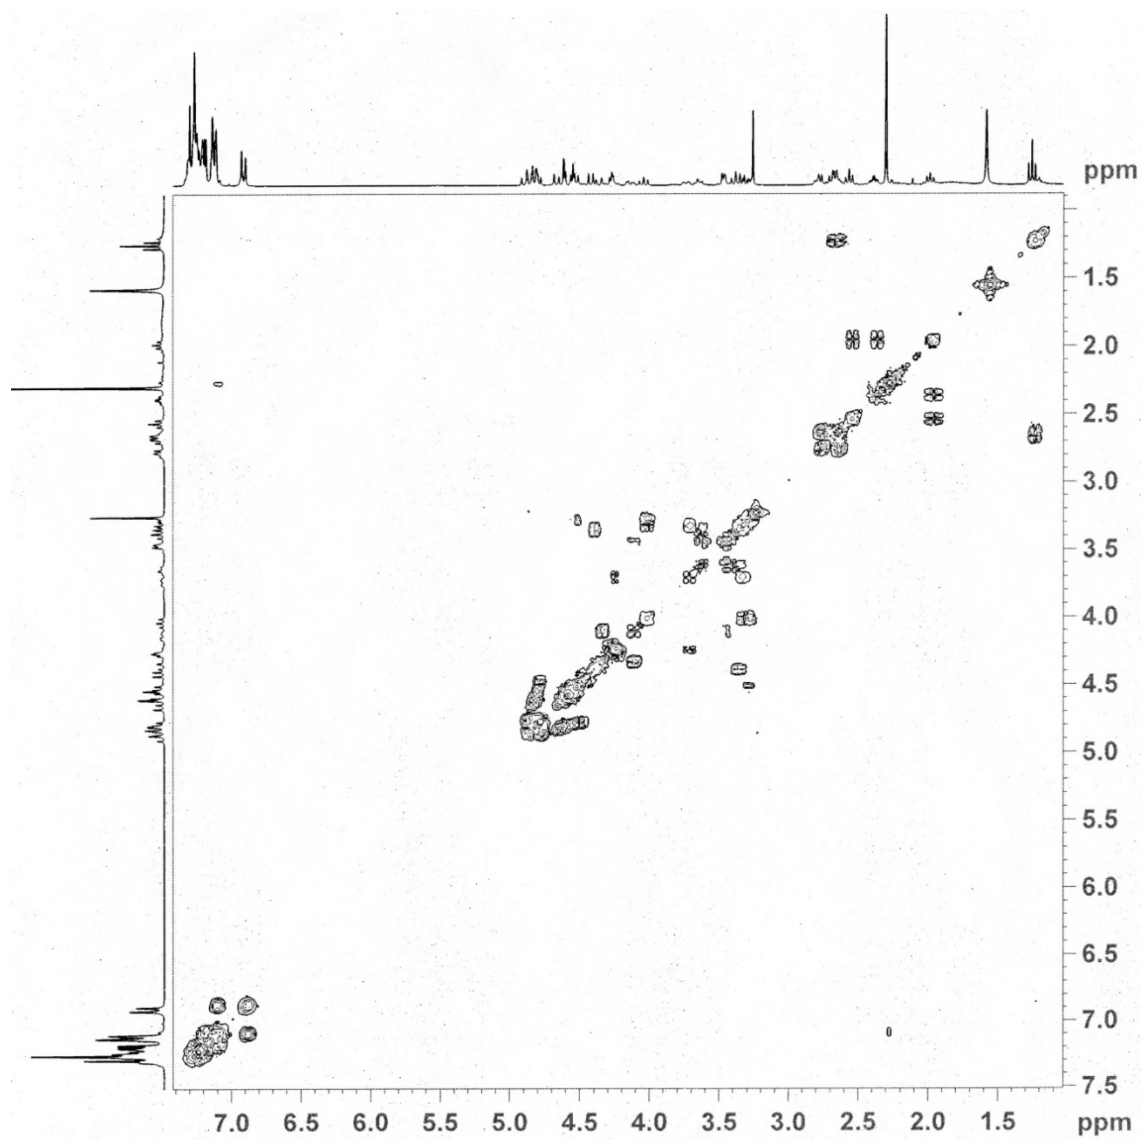

CDCl<sub>3</sub> at 300 MHz

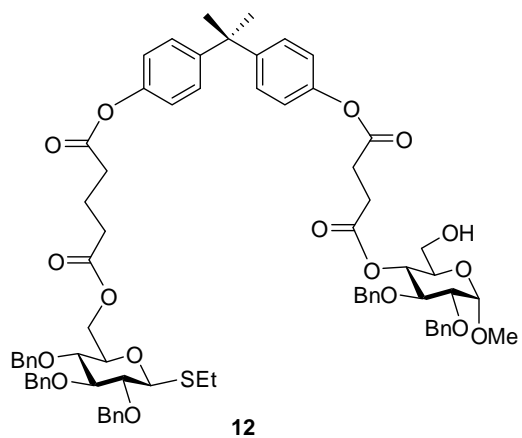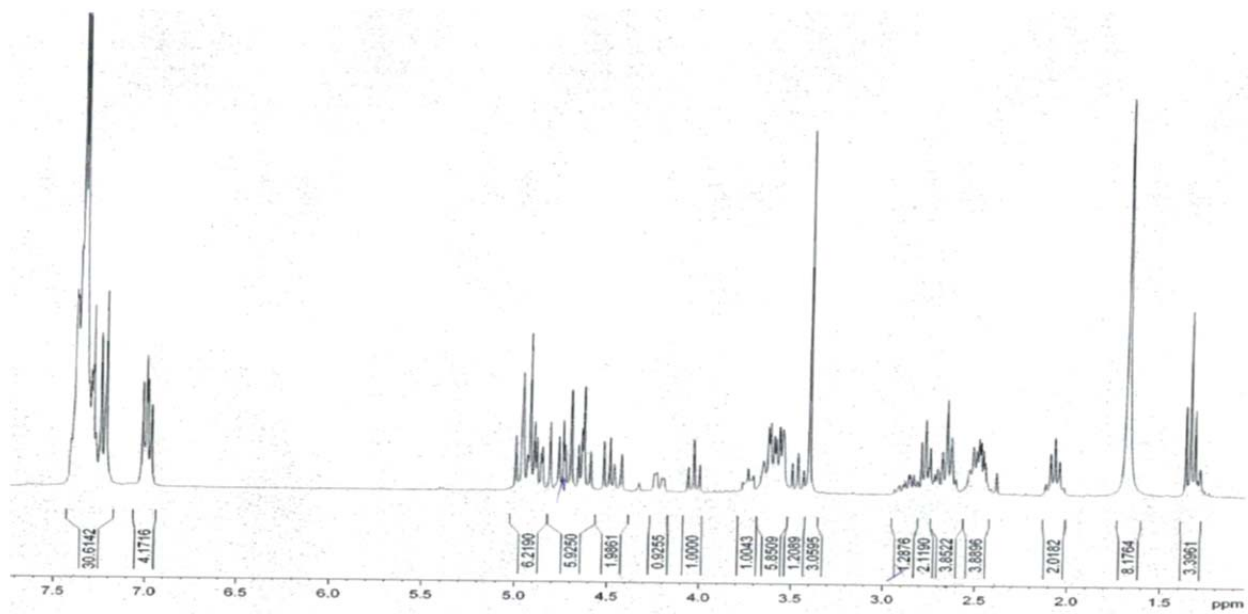

CDCl<sub>3</sub> at 300 MHz

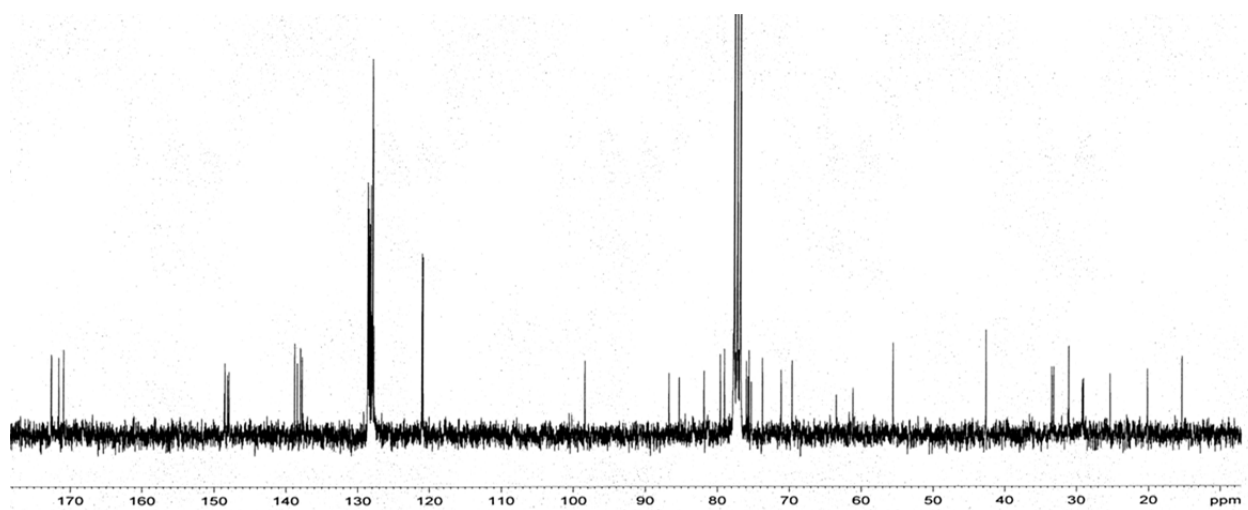

CDCl<sub>3</sub> at 75 MHz



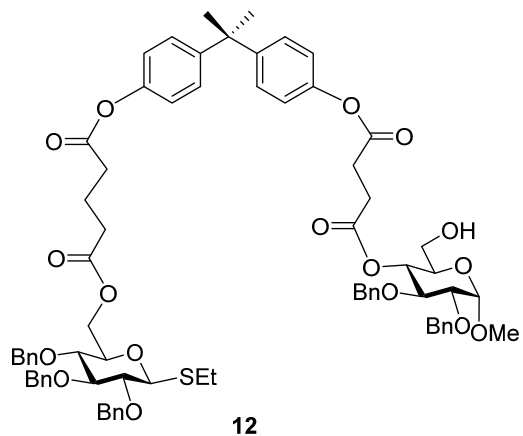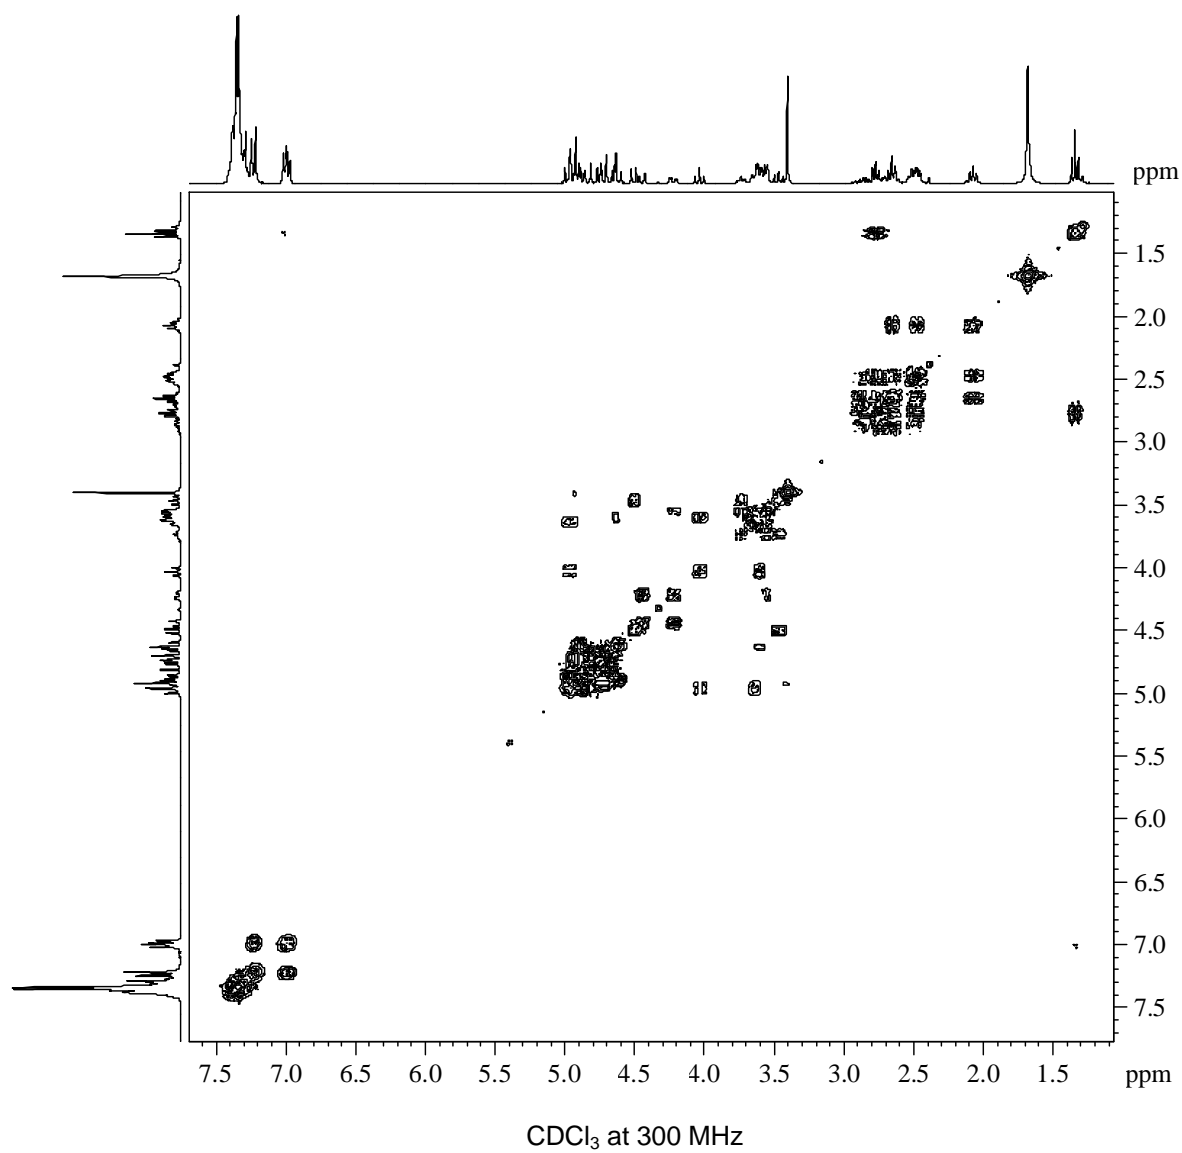

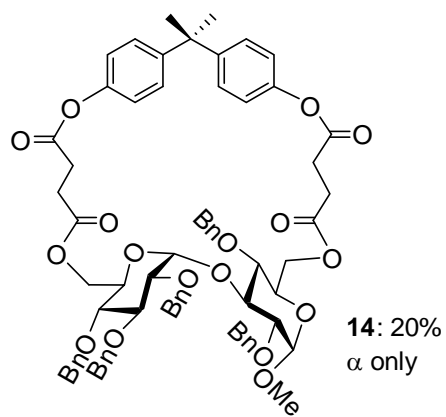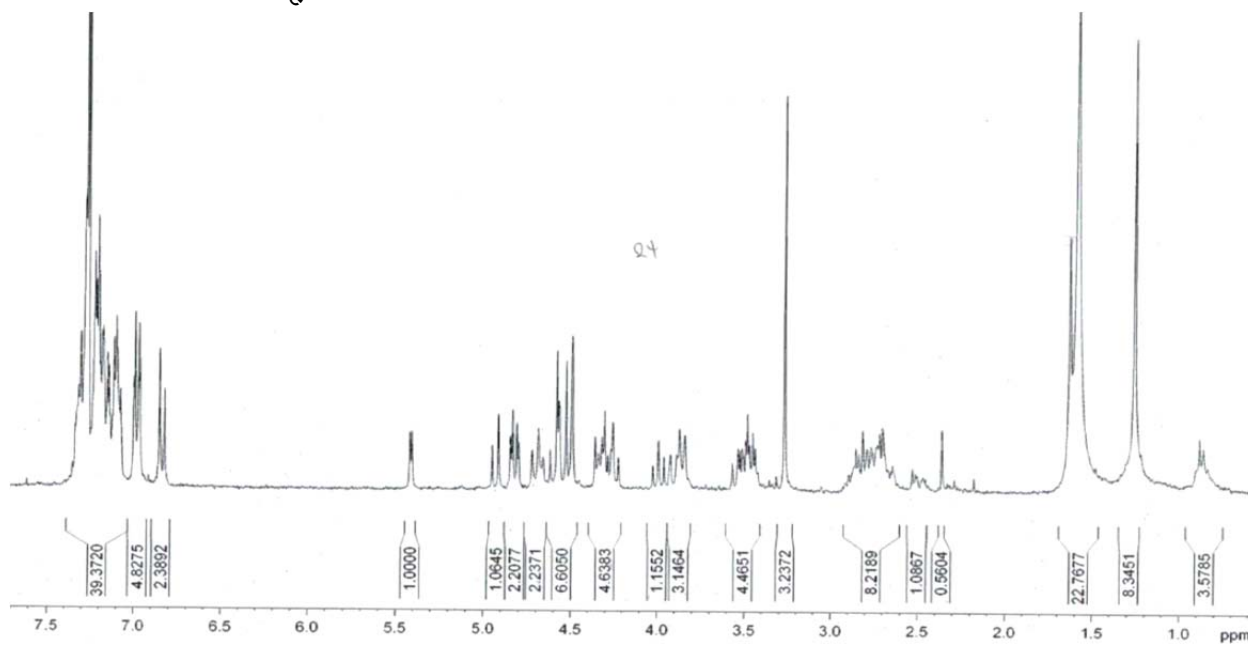

CDCl<sub>3</sub> at 300 MHz

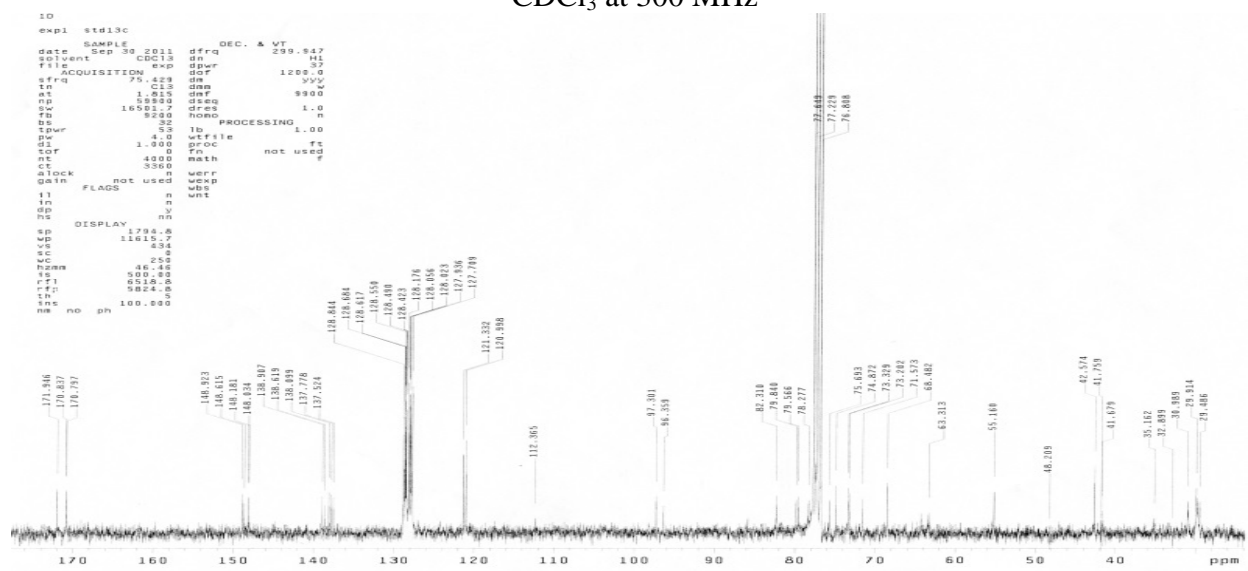

CDCl<sub>3</sub> at 75 MHz





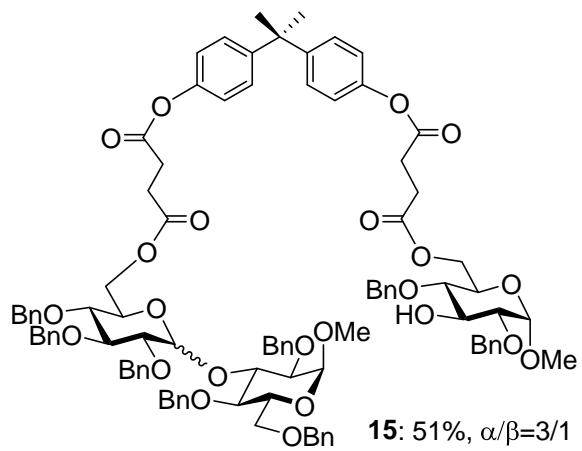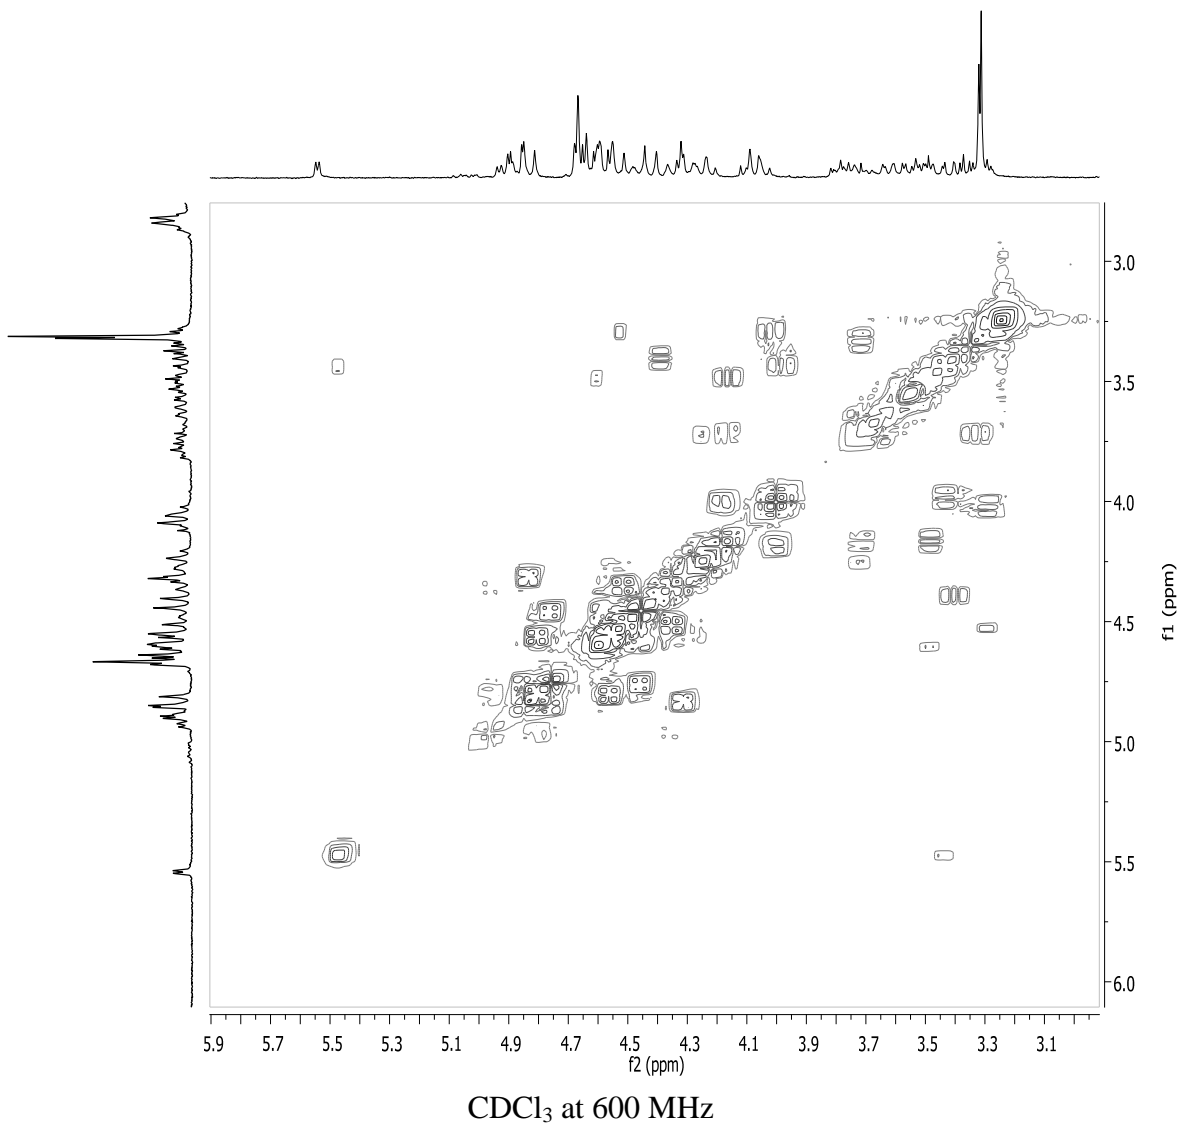

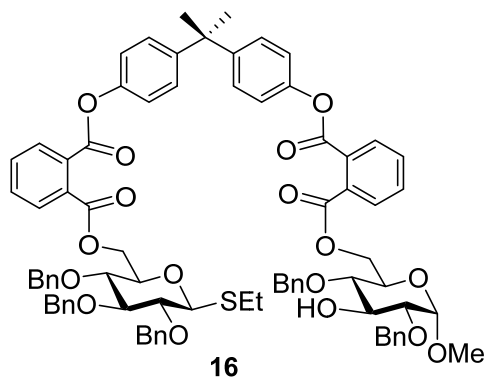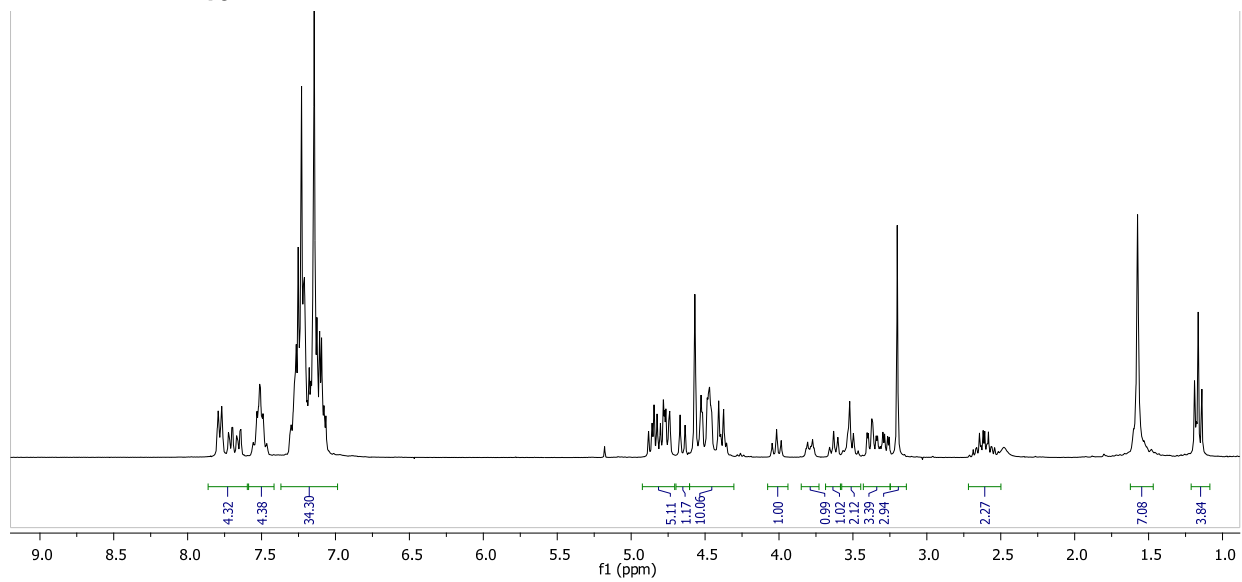

$\text{CDCl}_3$  at 300 MHz

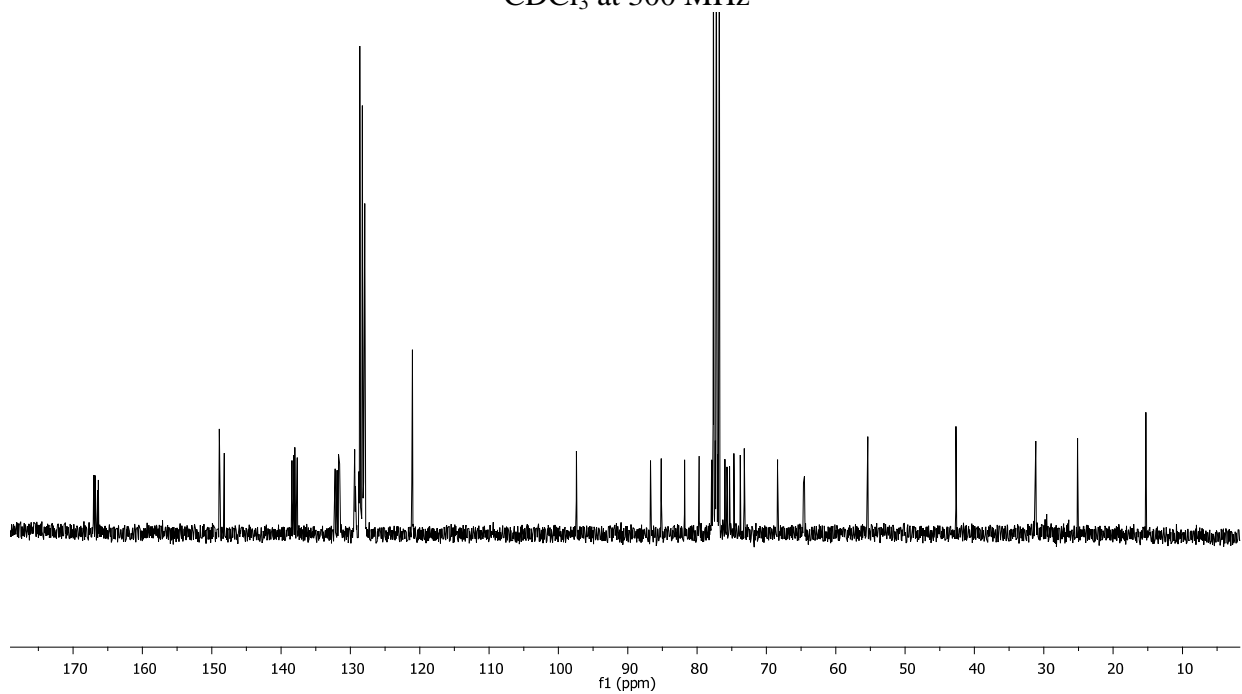

$\text{CDCl}_3$  at 75 MHz

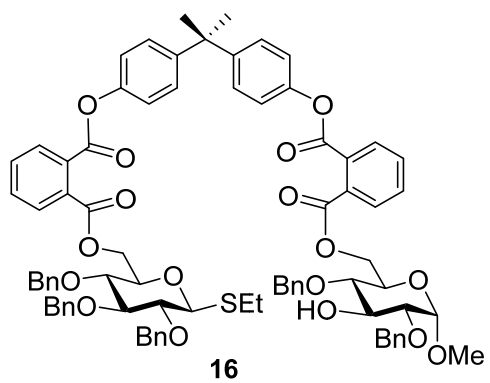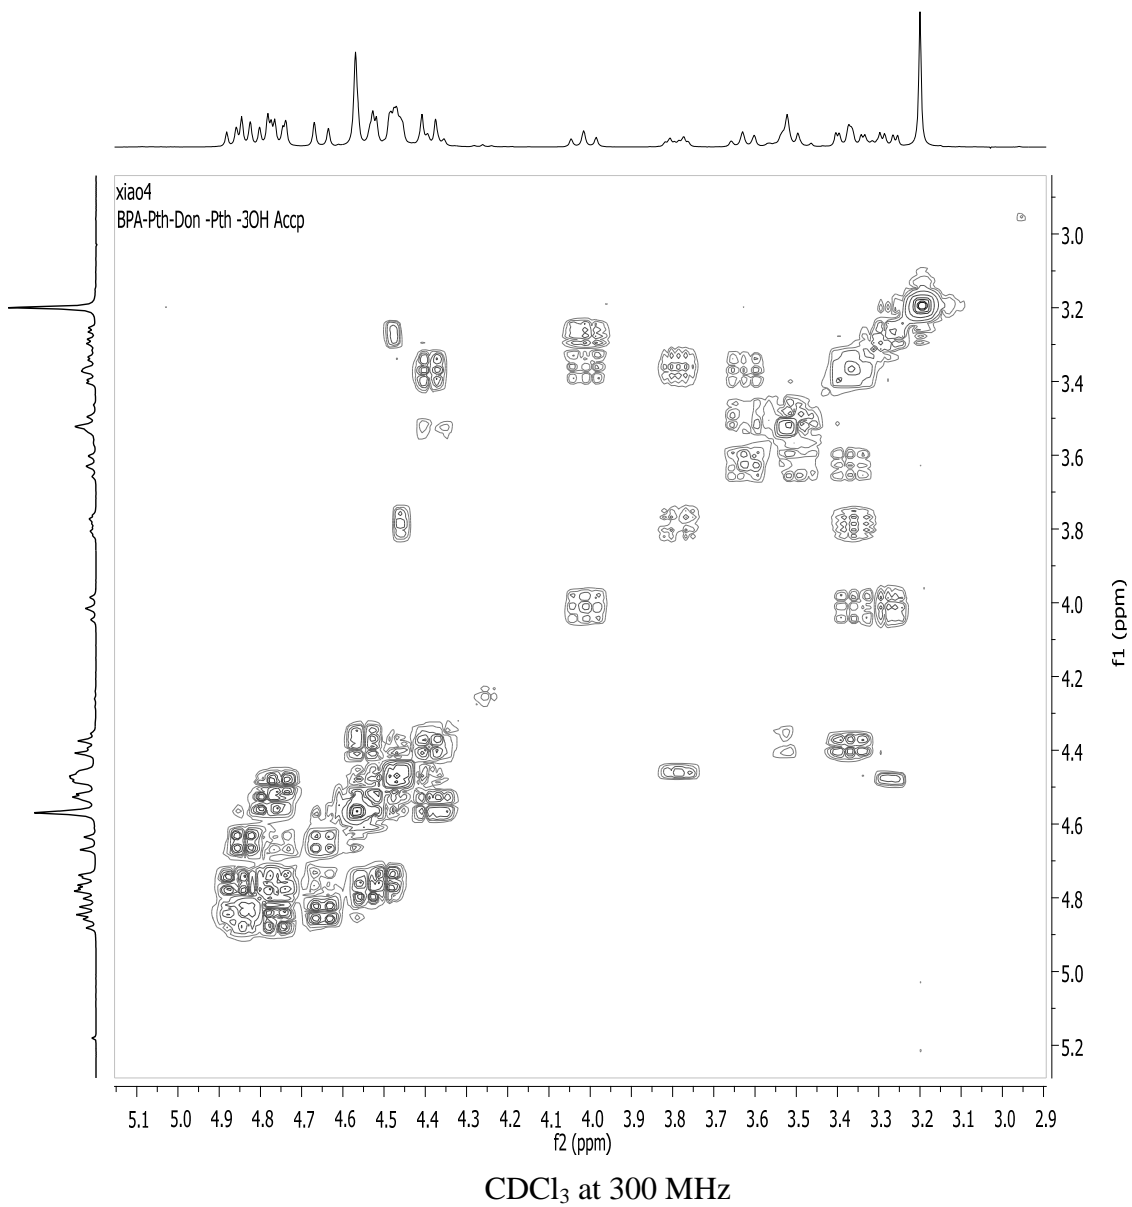

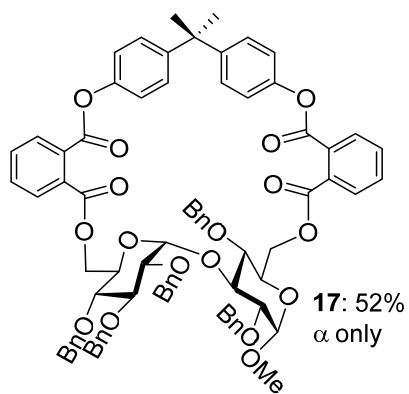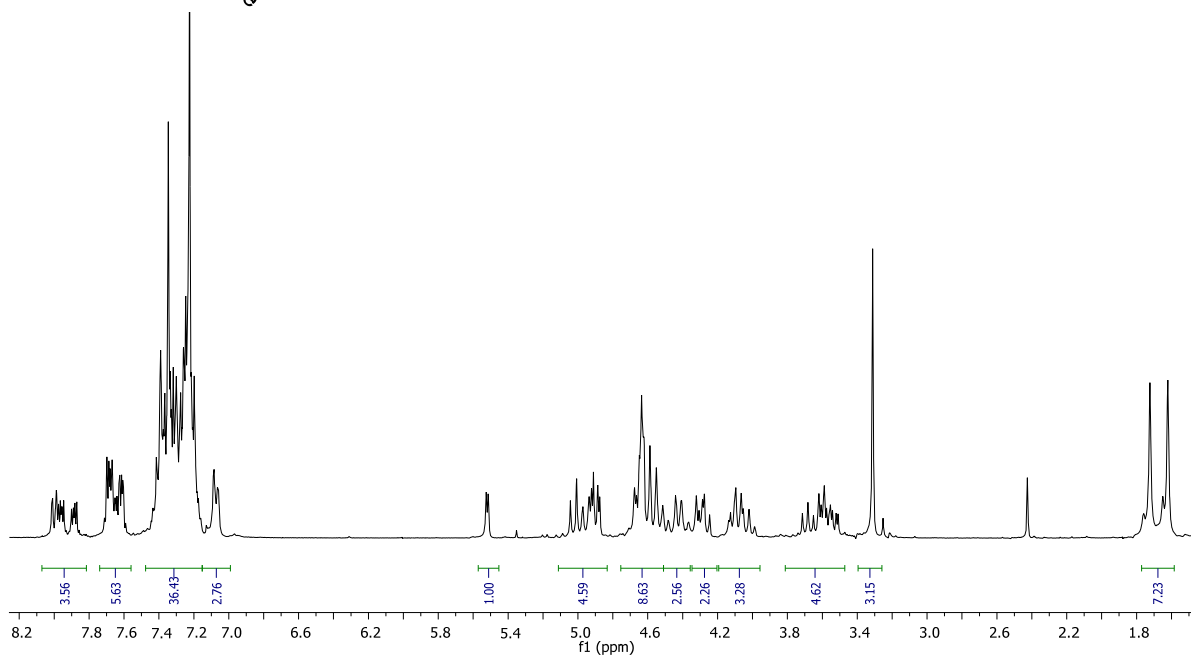

CDCl<sub>3</sub> at 300 MHz

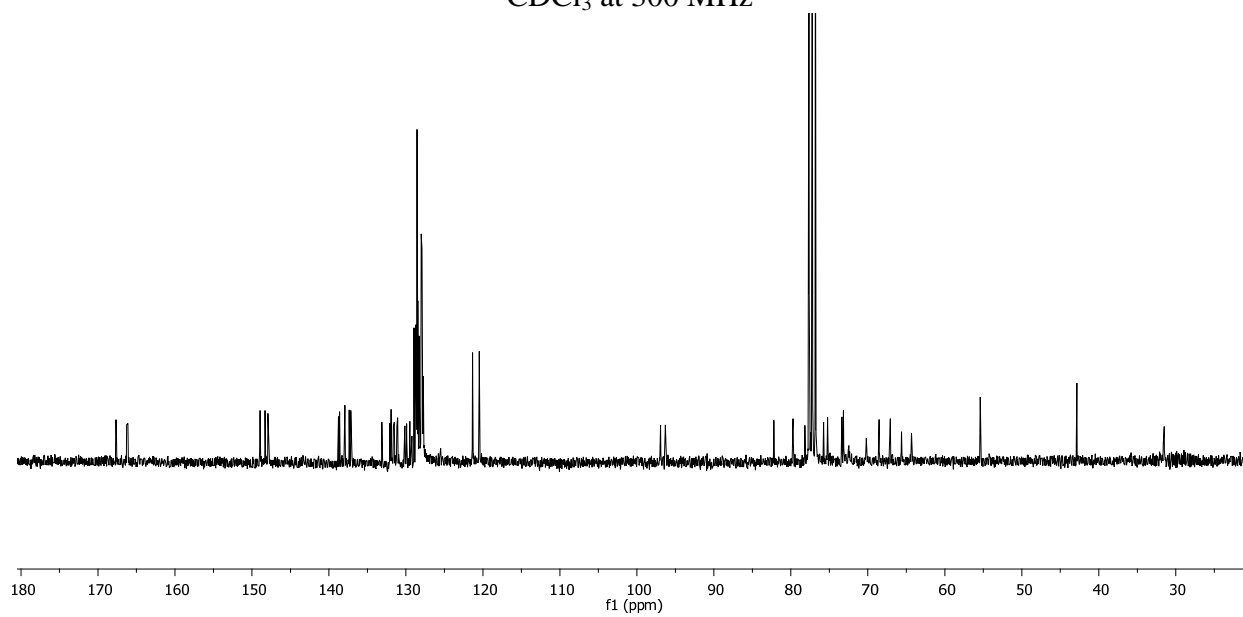

CDCl<sub>3</sub> at 75 MHz



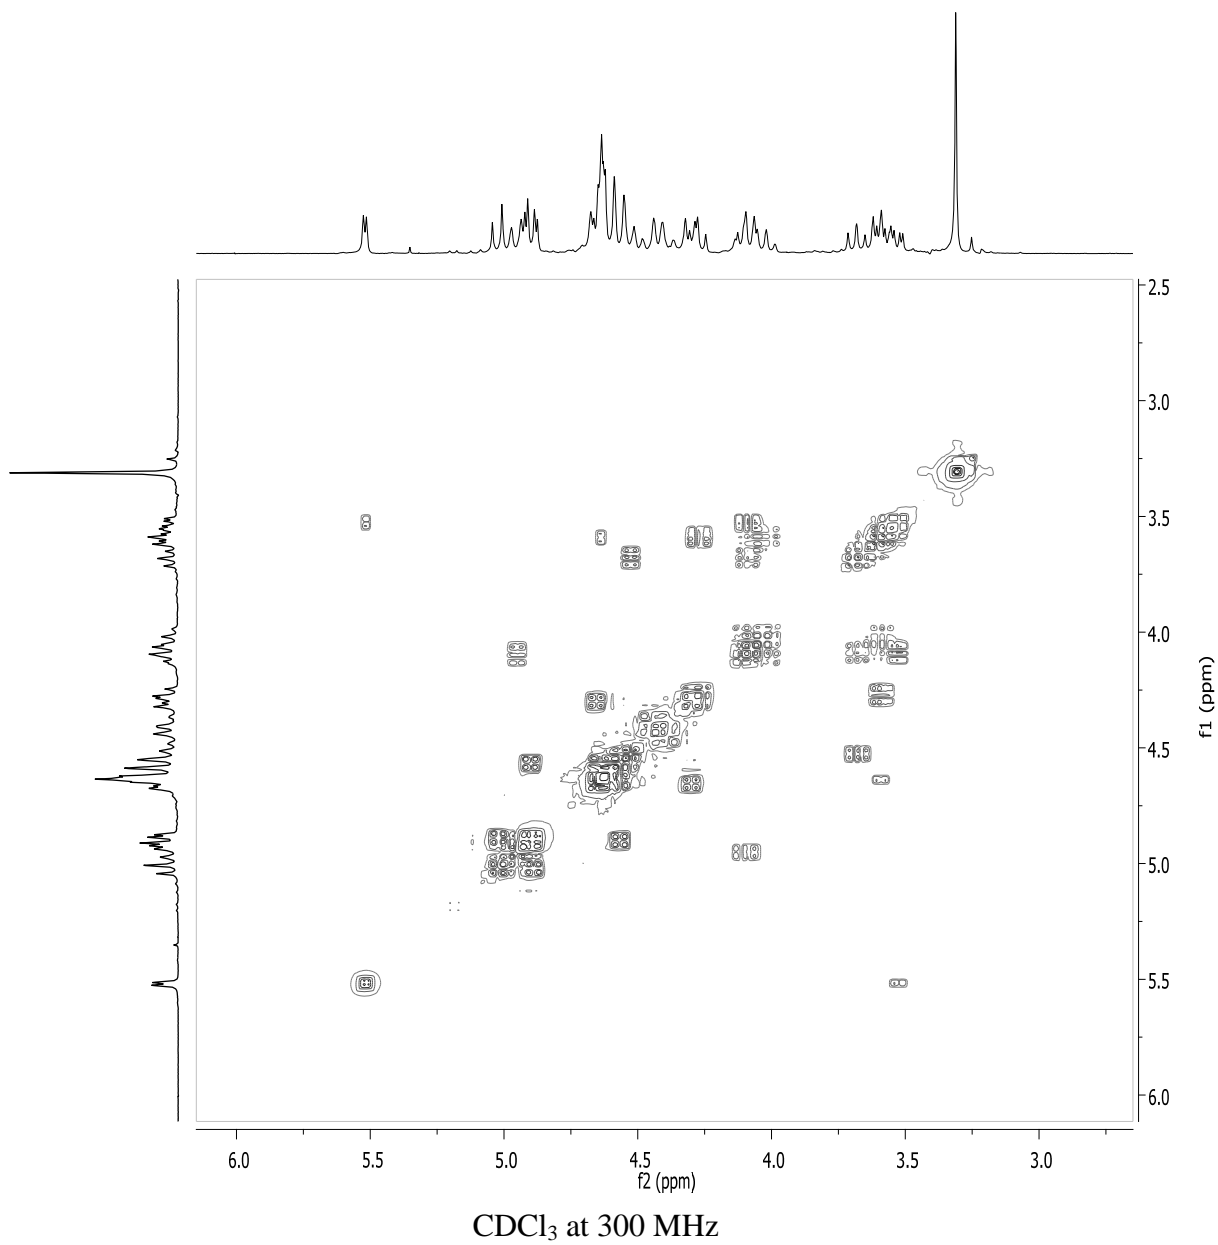

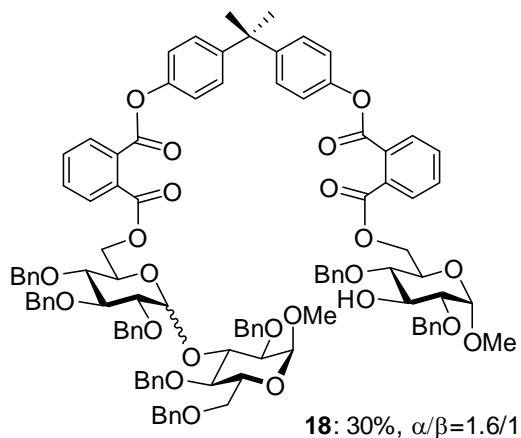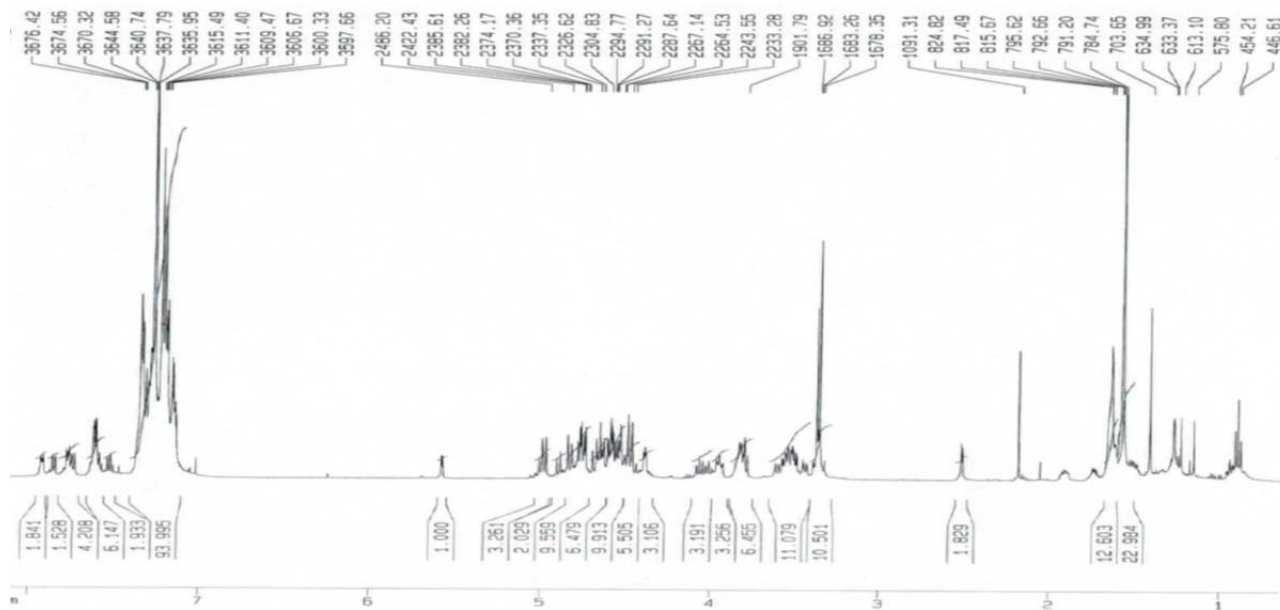

CDCl<sub>3</sub> at 500 MHz

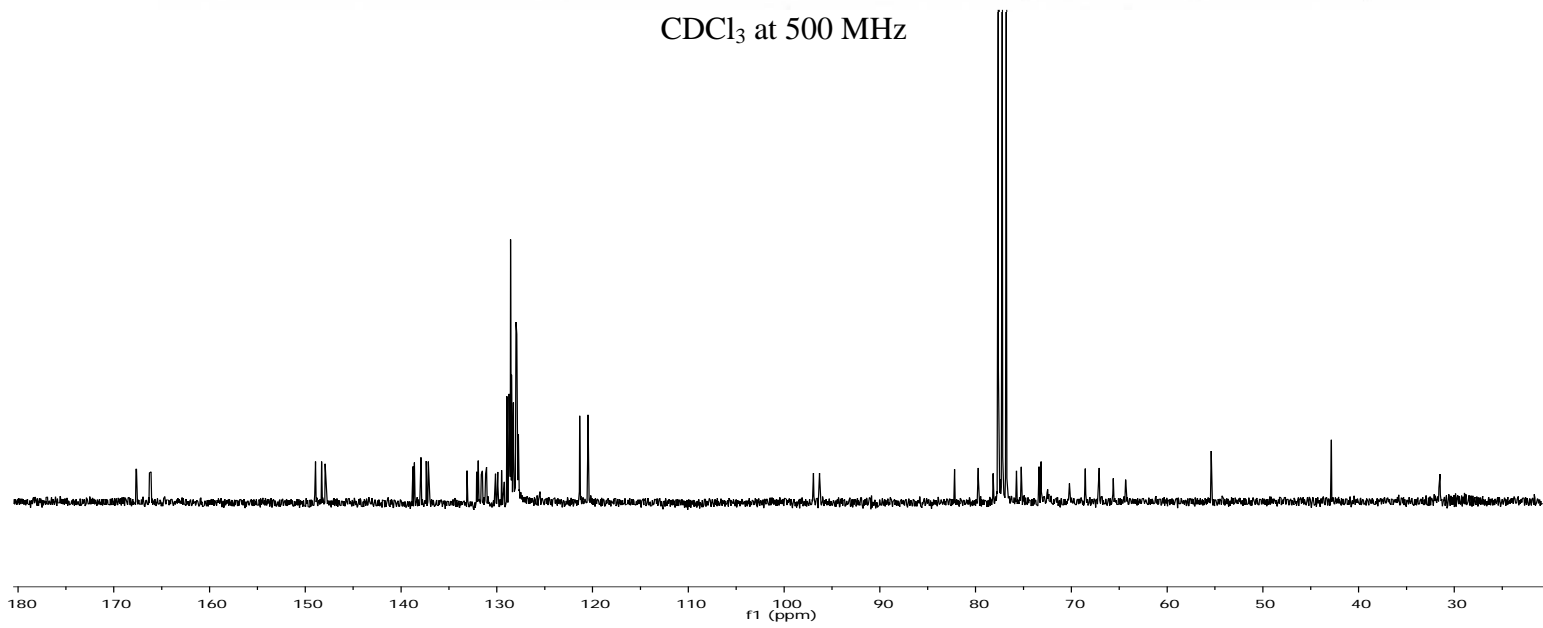

CDCl<sub>3</sub> at 125 MHz

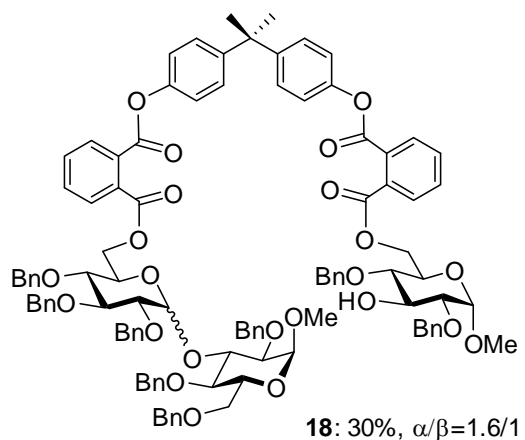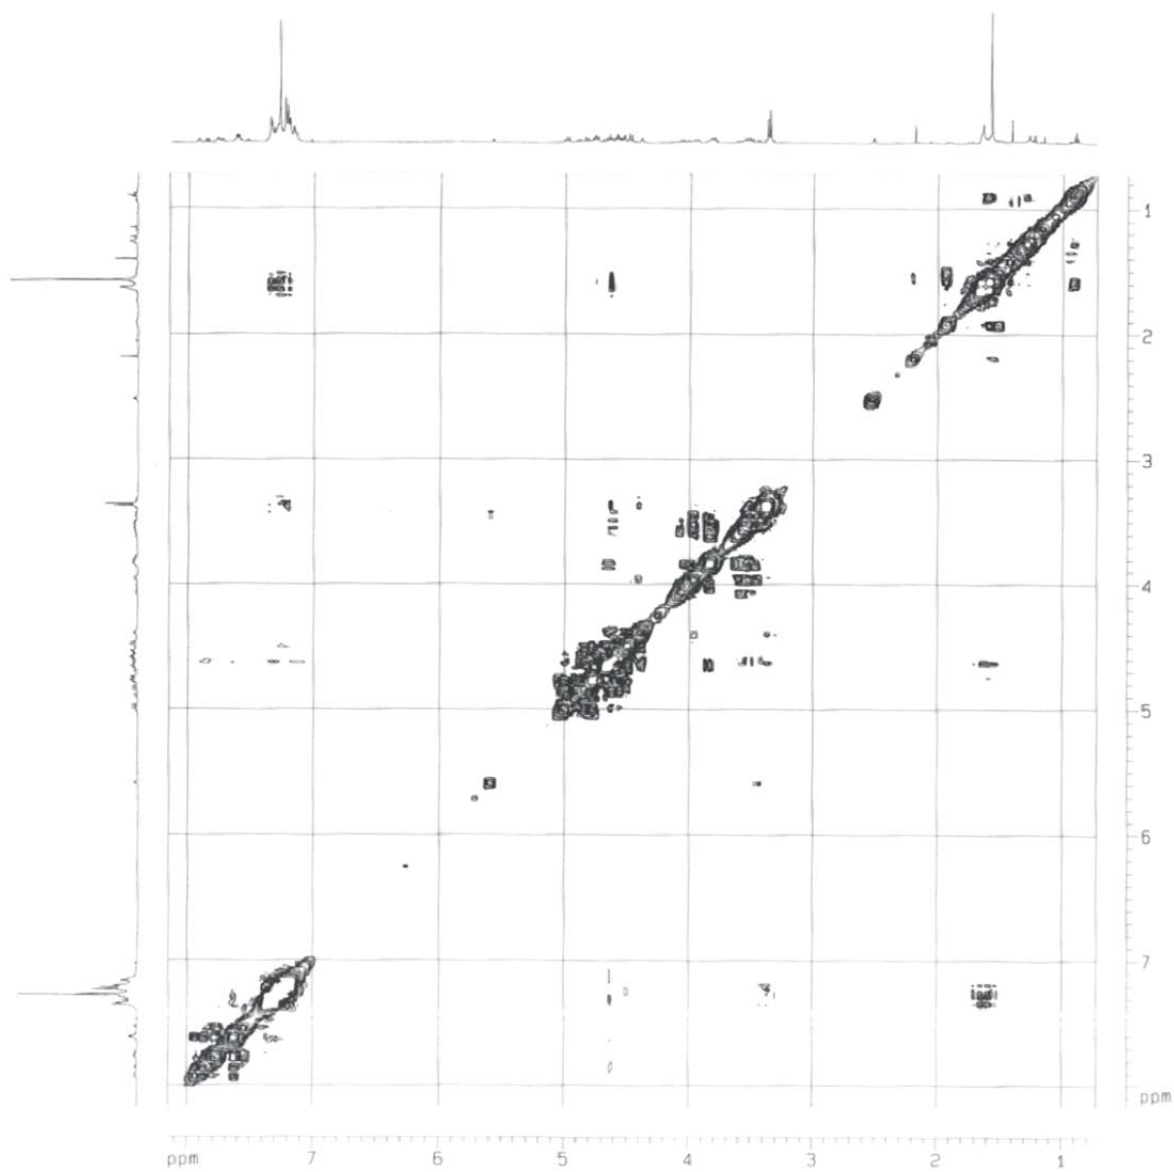

$\text{CDCl}_3$  at 500 MHz

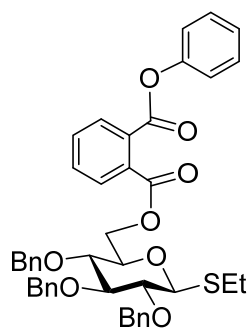

23

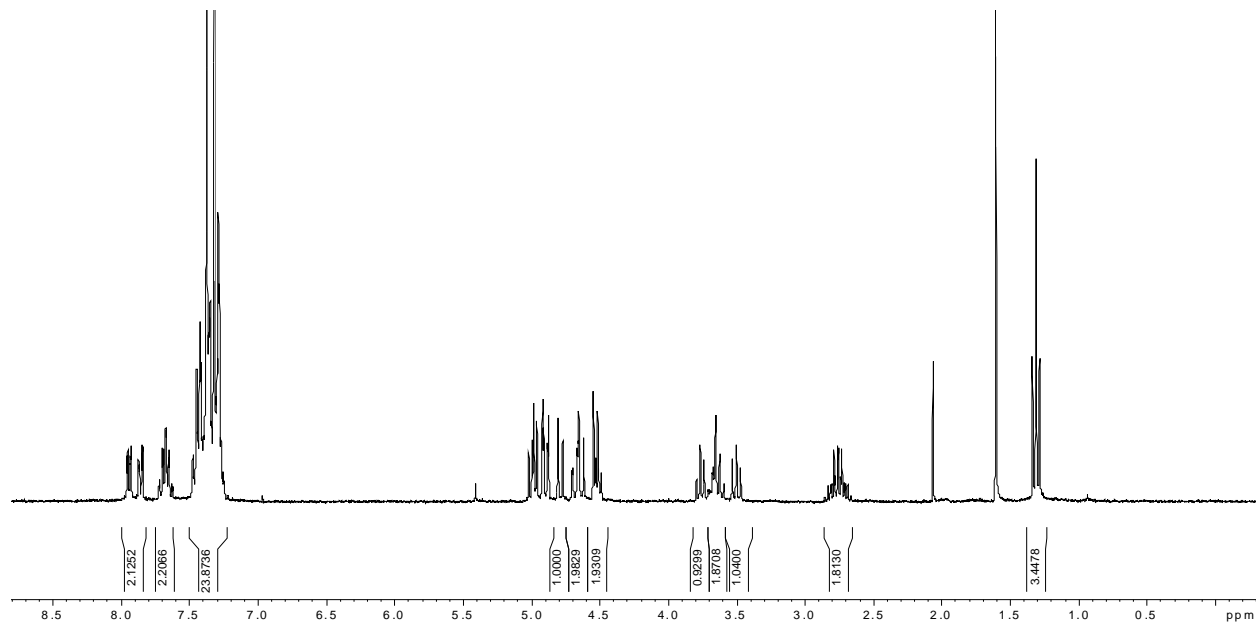

CDCl<sub>3</sub> at 300 MHz

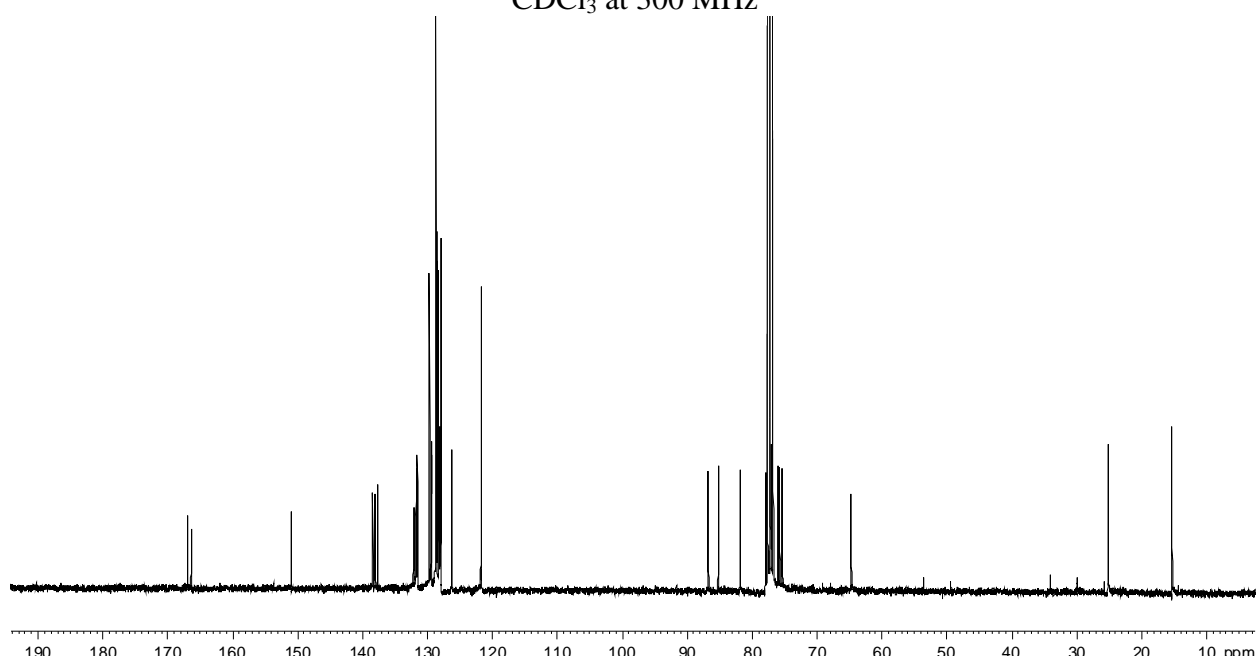

CDCl<sub>3</sub> at 75 MHz



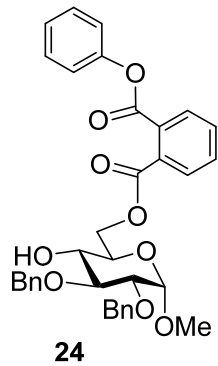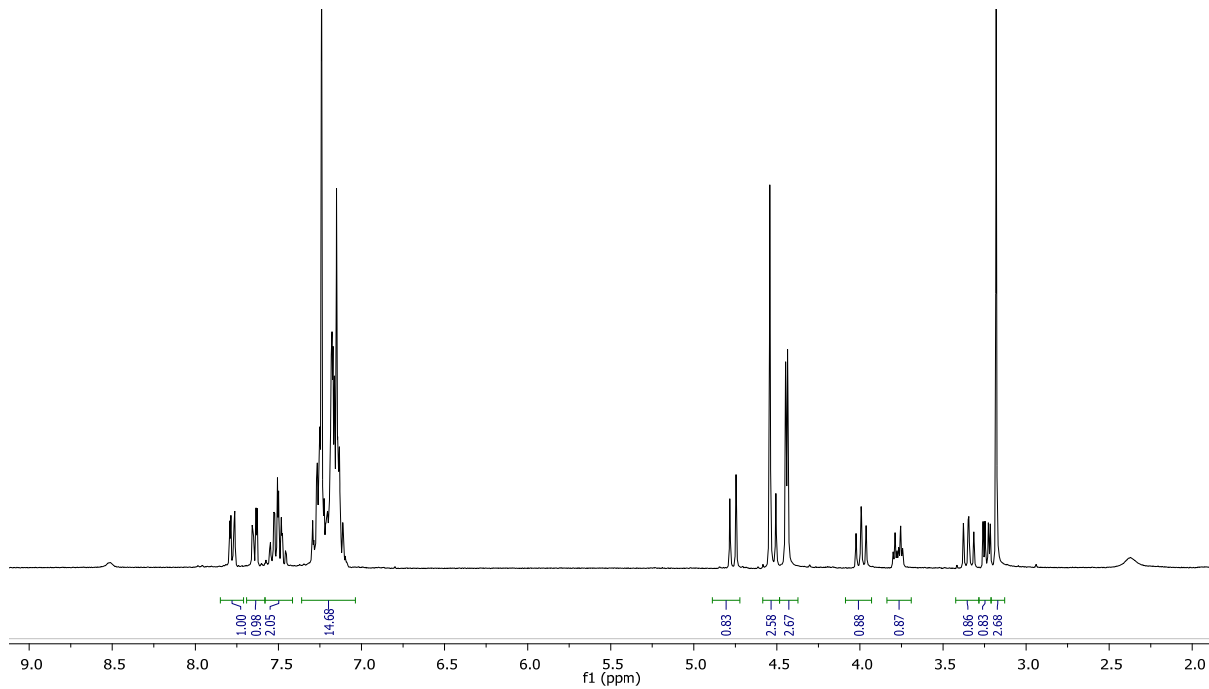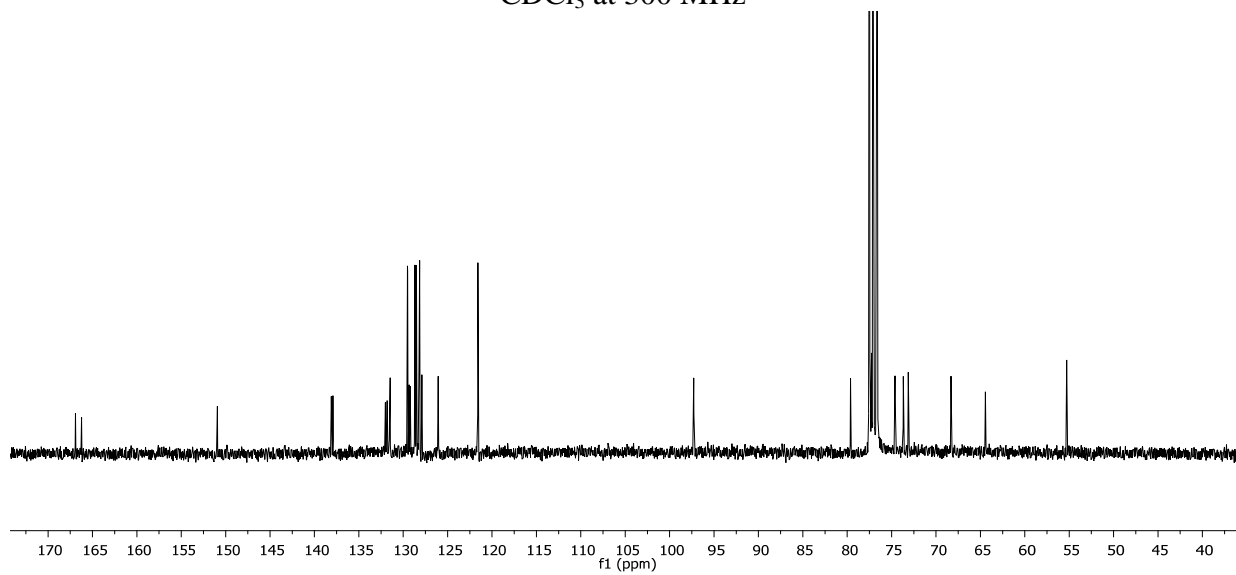

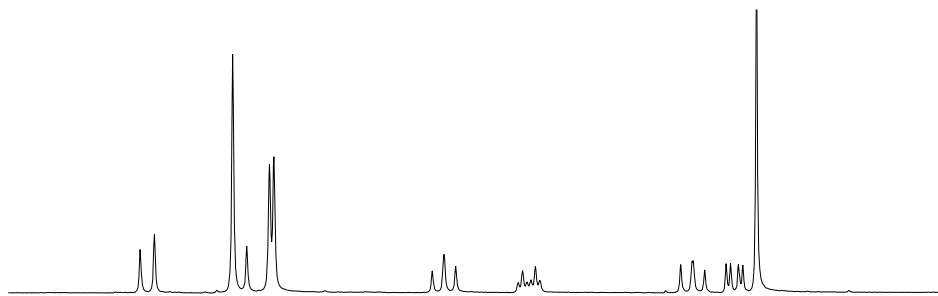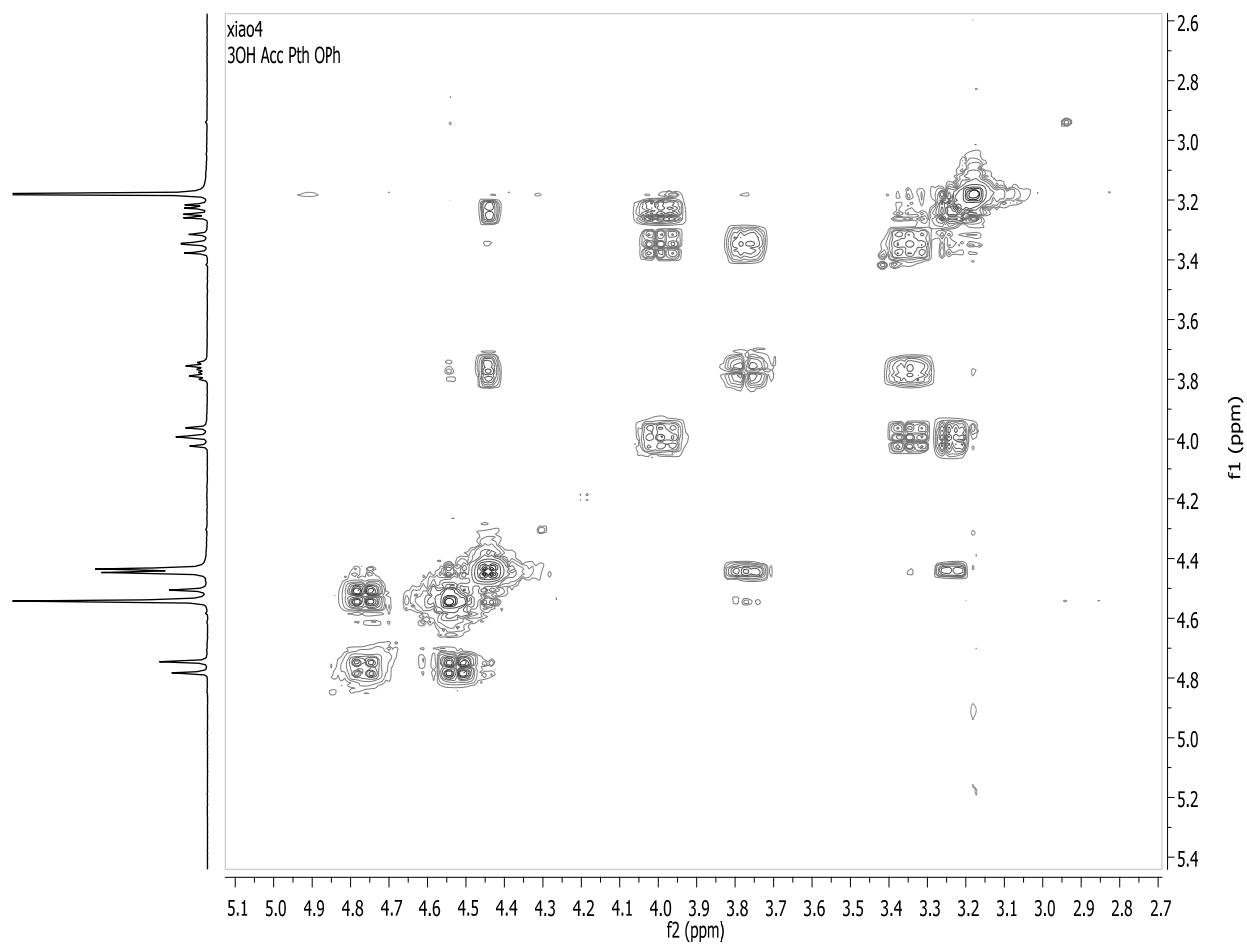

CDCl<sub>3</sub> at 300 MHz

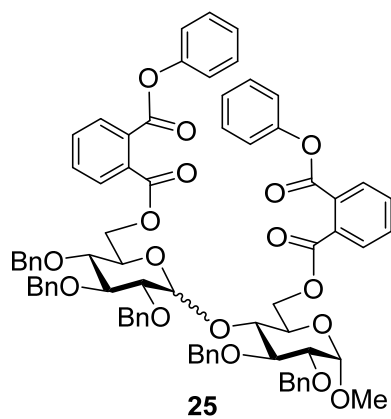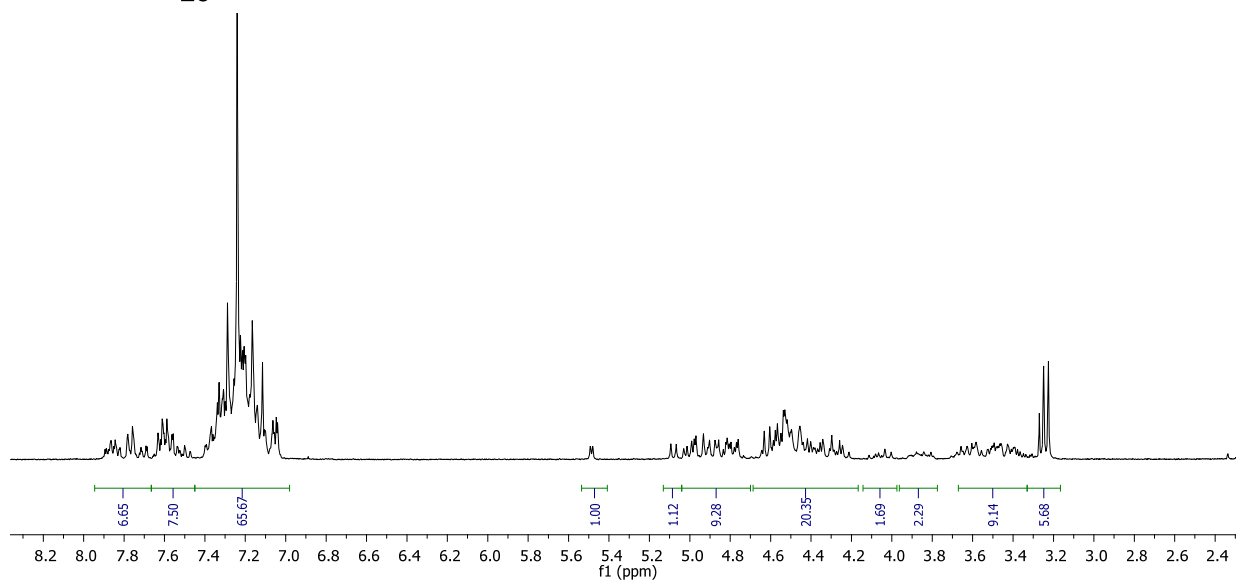

CDCl<sub>3</sub> at 300 MHz

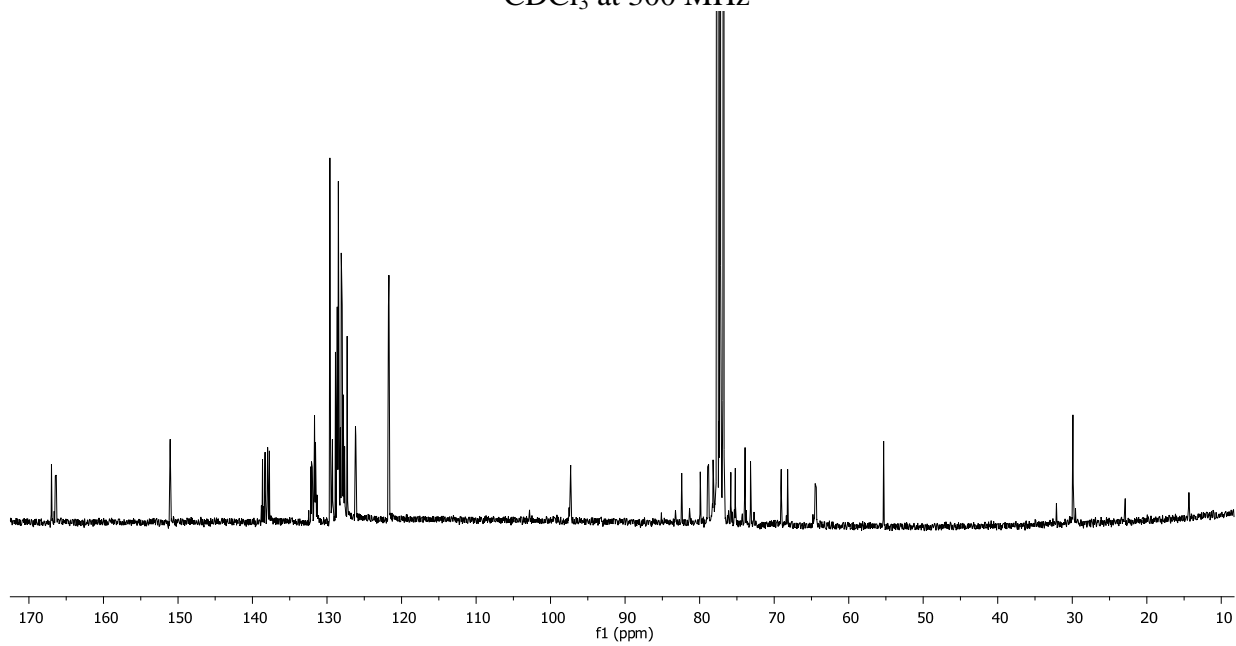

CDCl<sub>3</sub> at 75 MHz



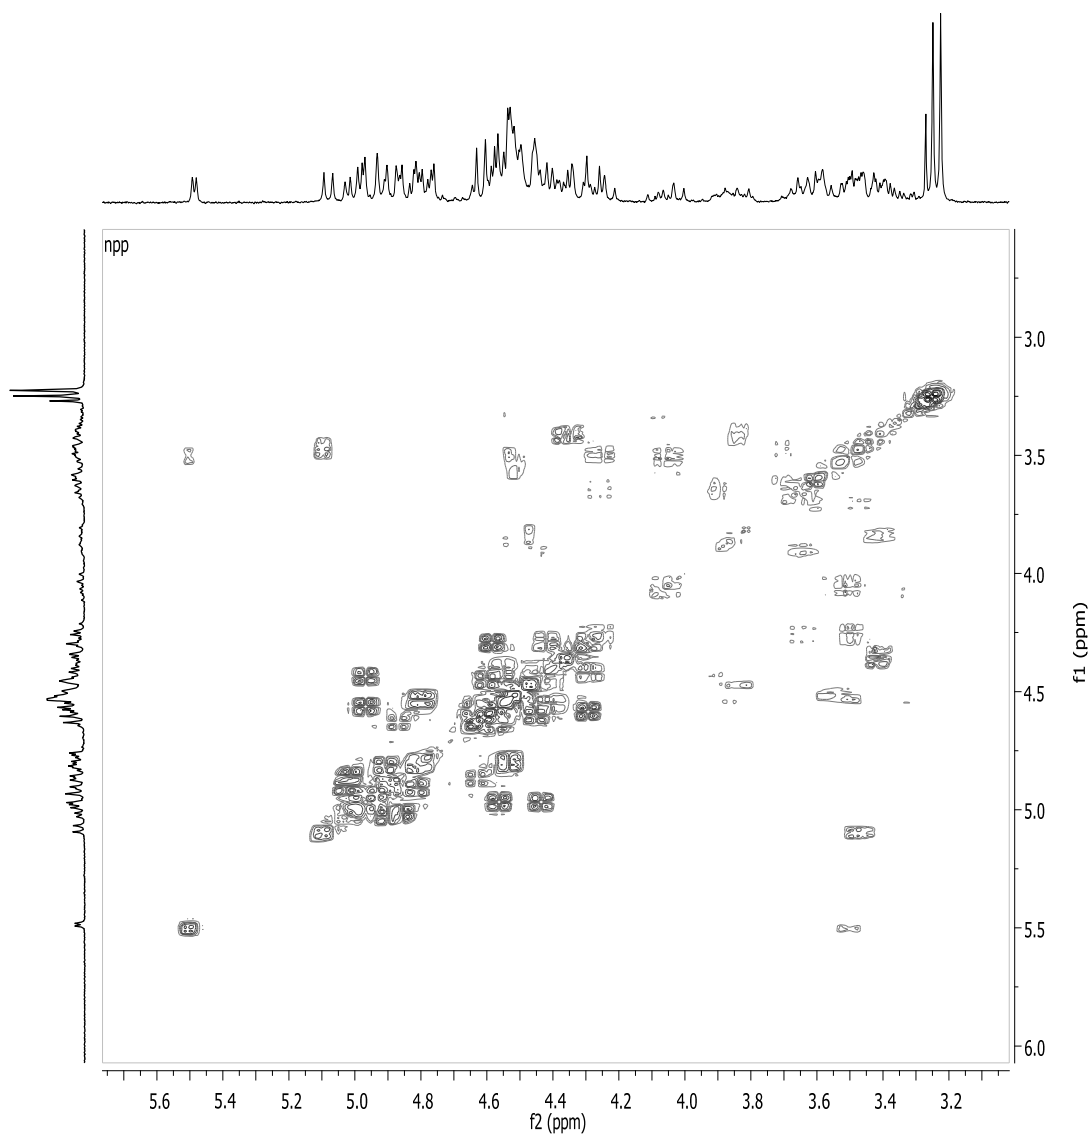

$\text{CDCl}_3$  at 300 MHz





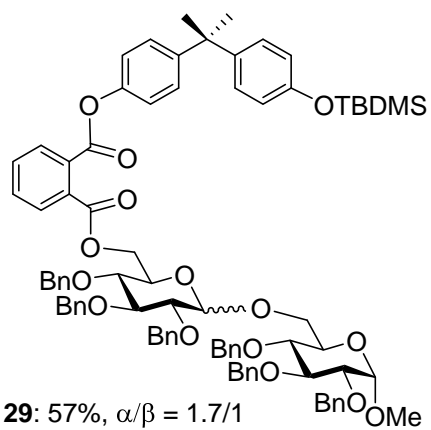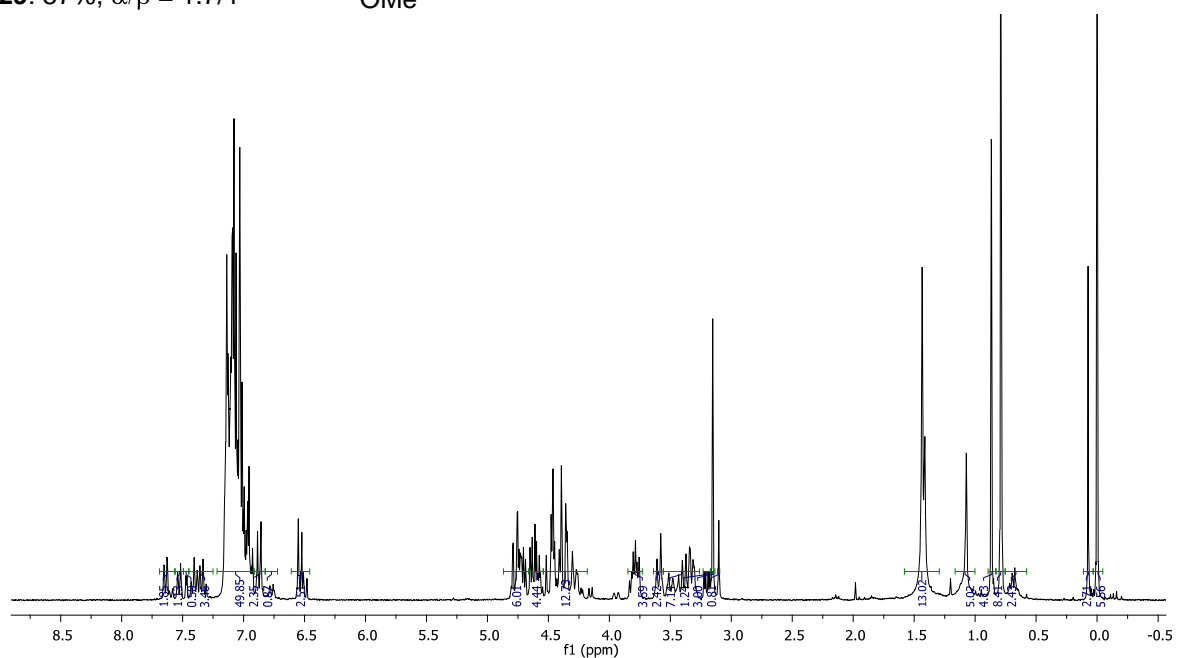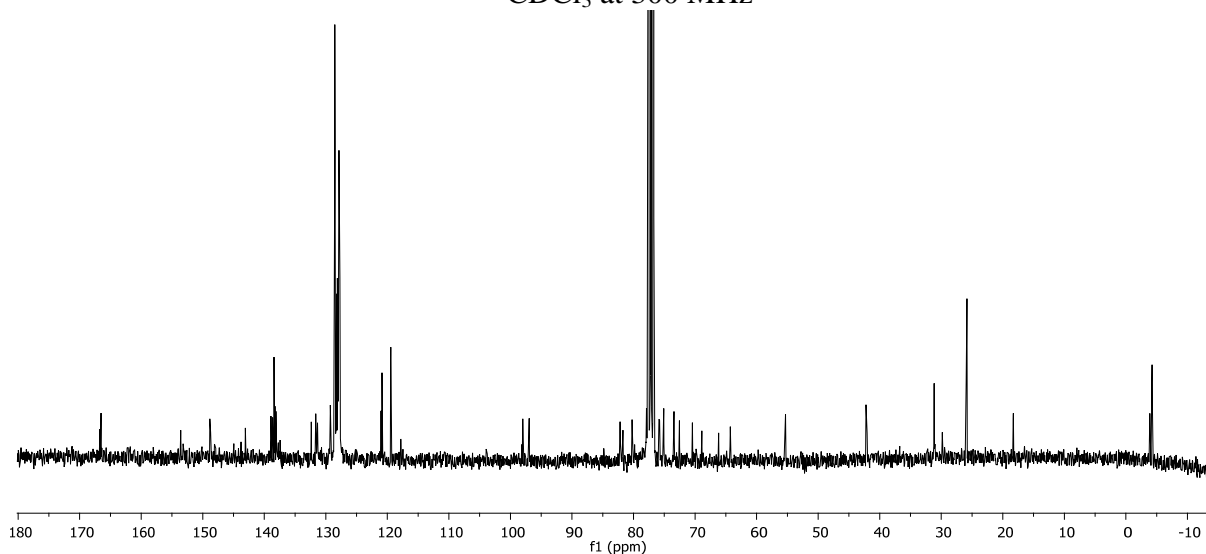



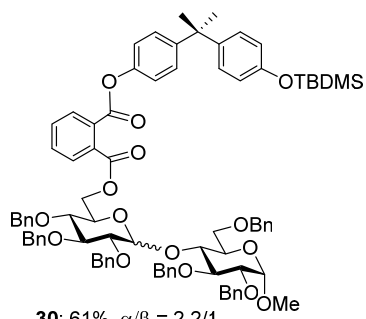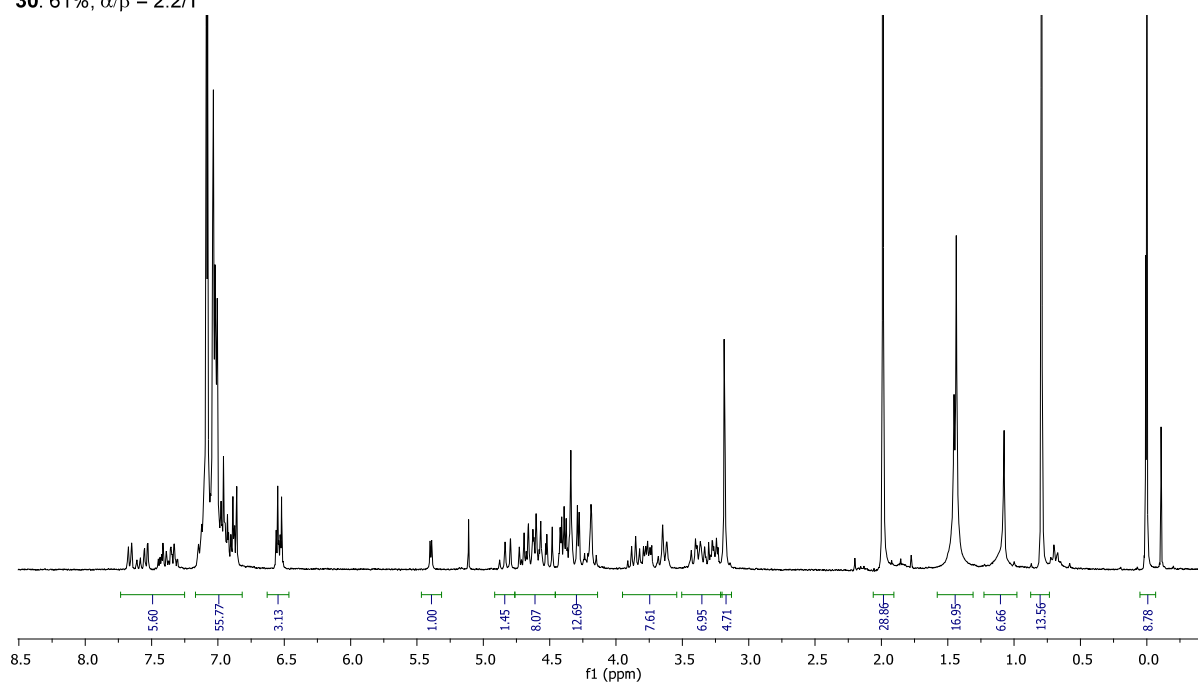

CDCl<sub>3</sub> at 600 MHz

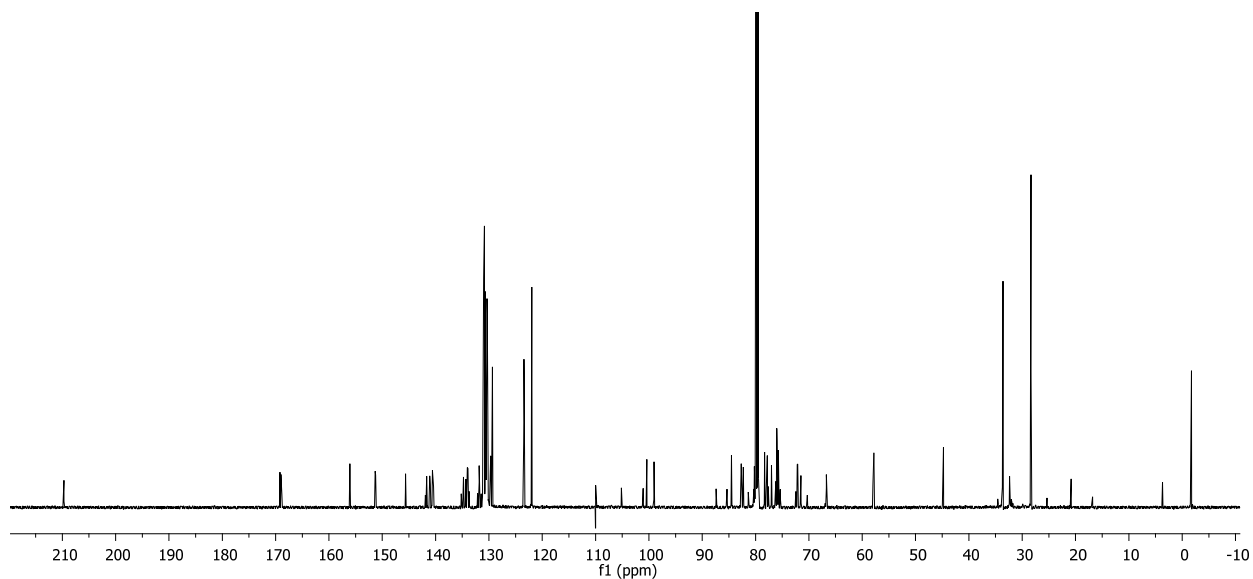

CDCl<sub>3</sub> at 150 MHz

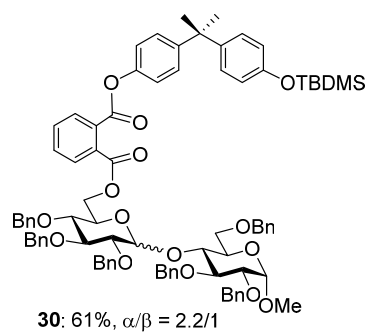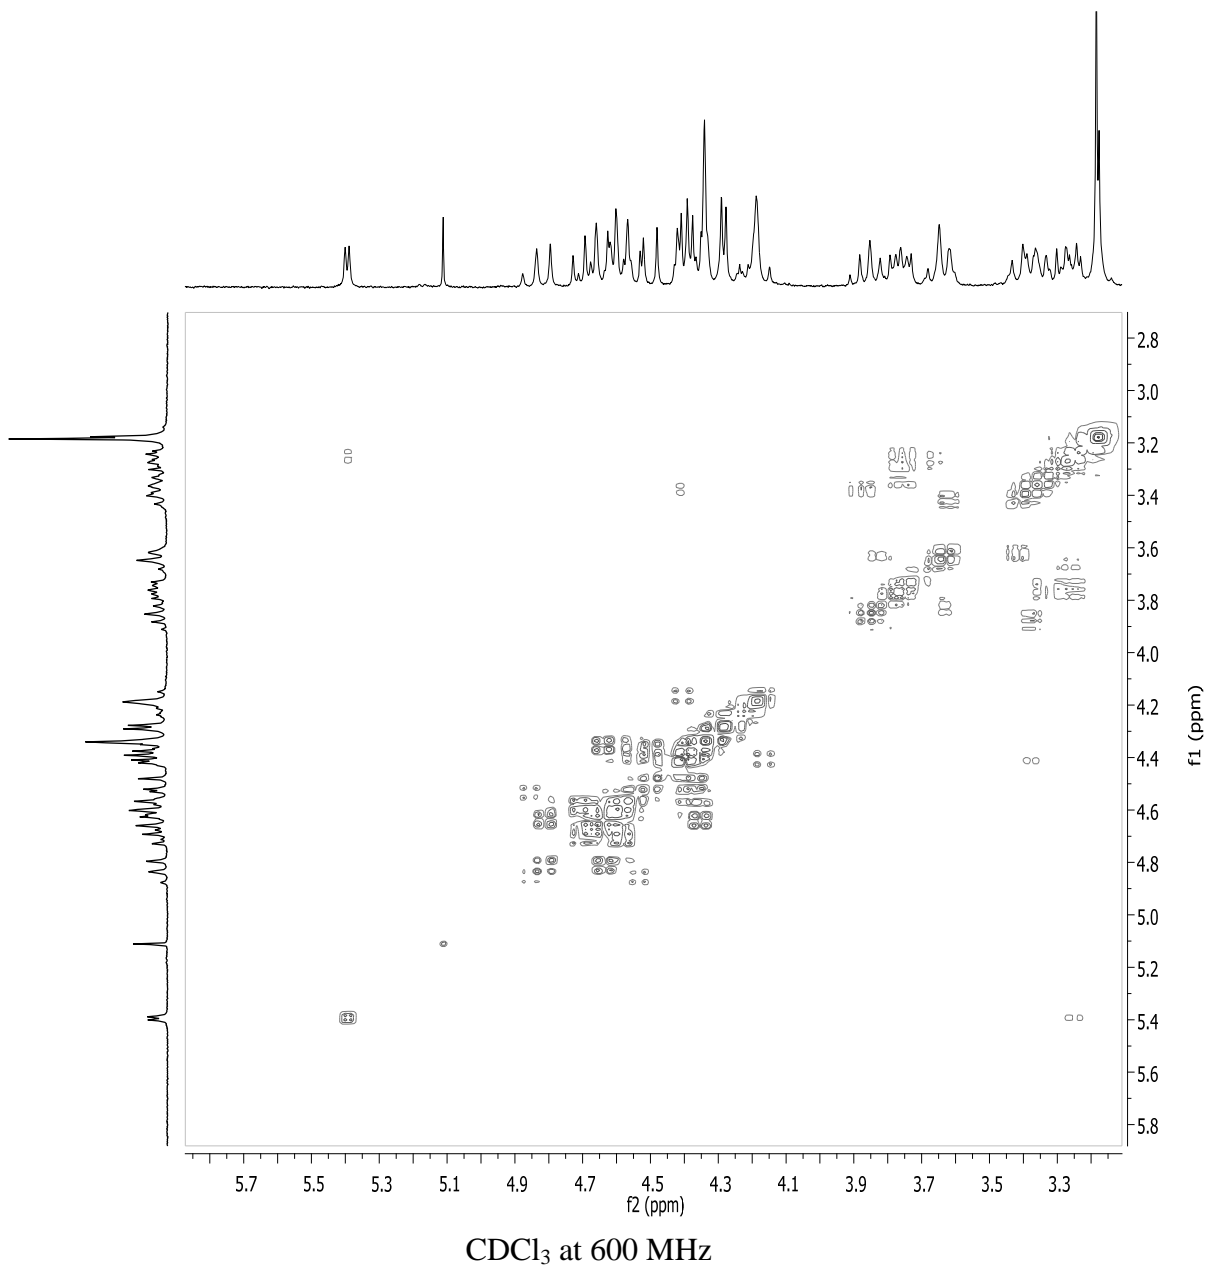

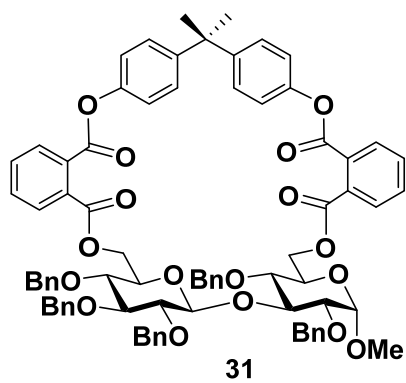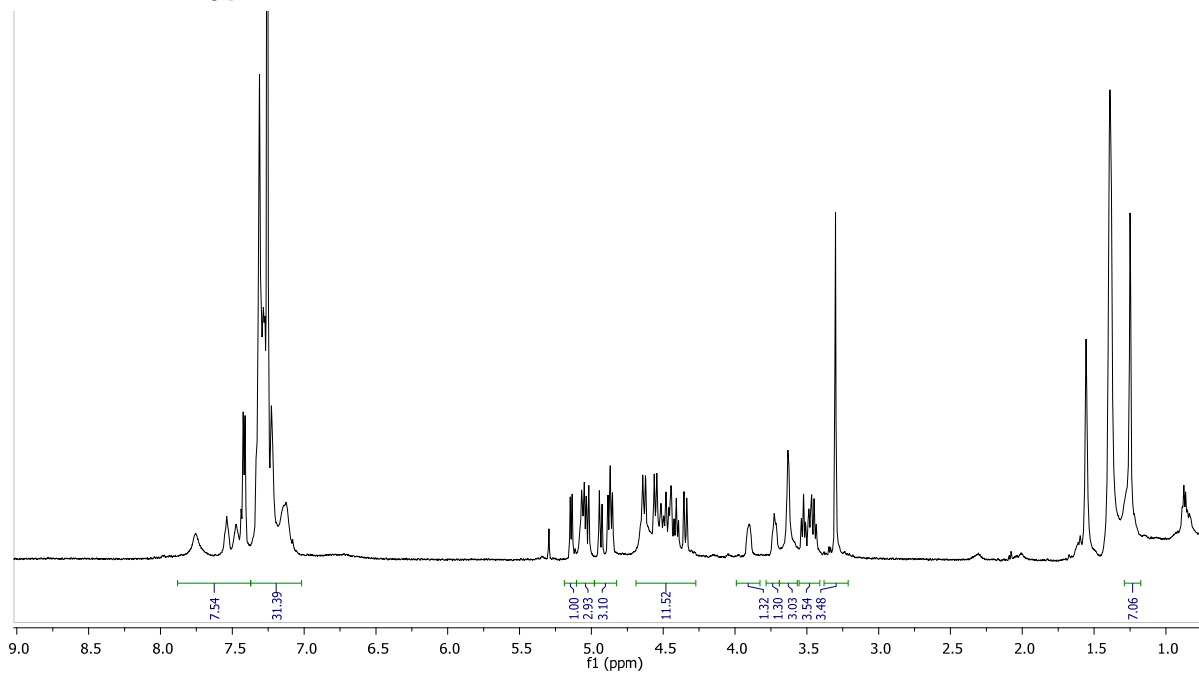

CDCl<sub>3</sub> at 300 MHz

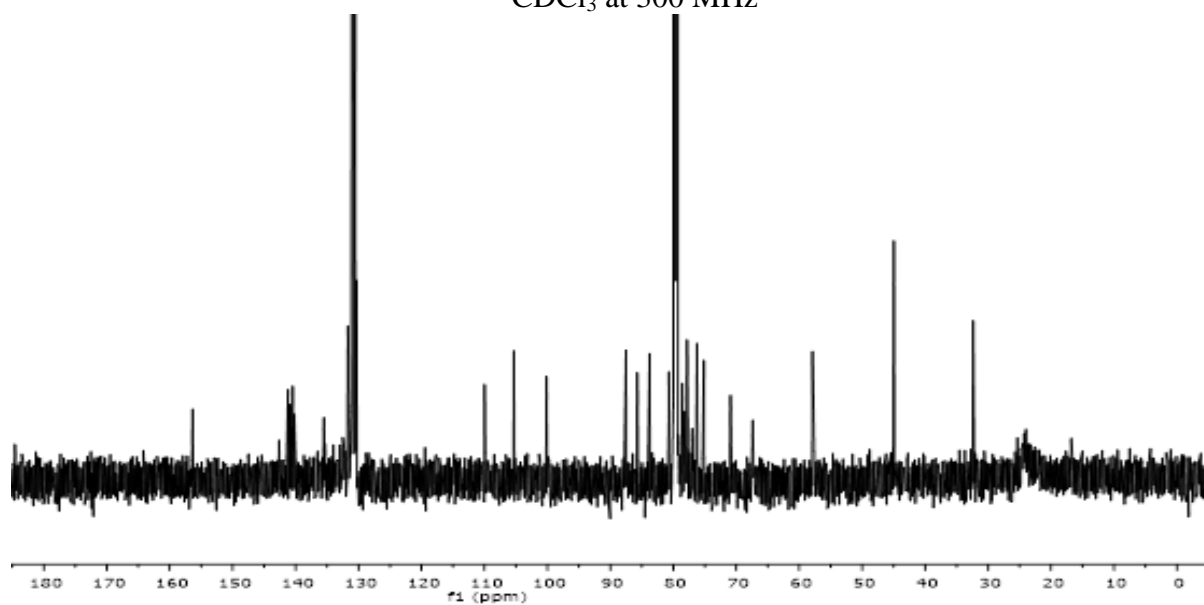

CDCl<sub>3</sub> at 75 MHz



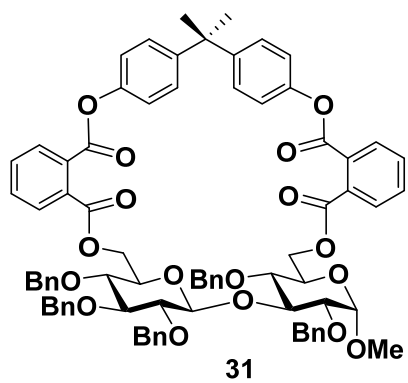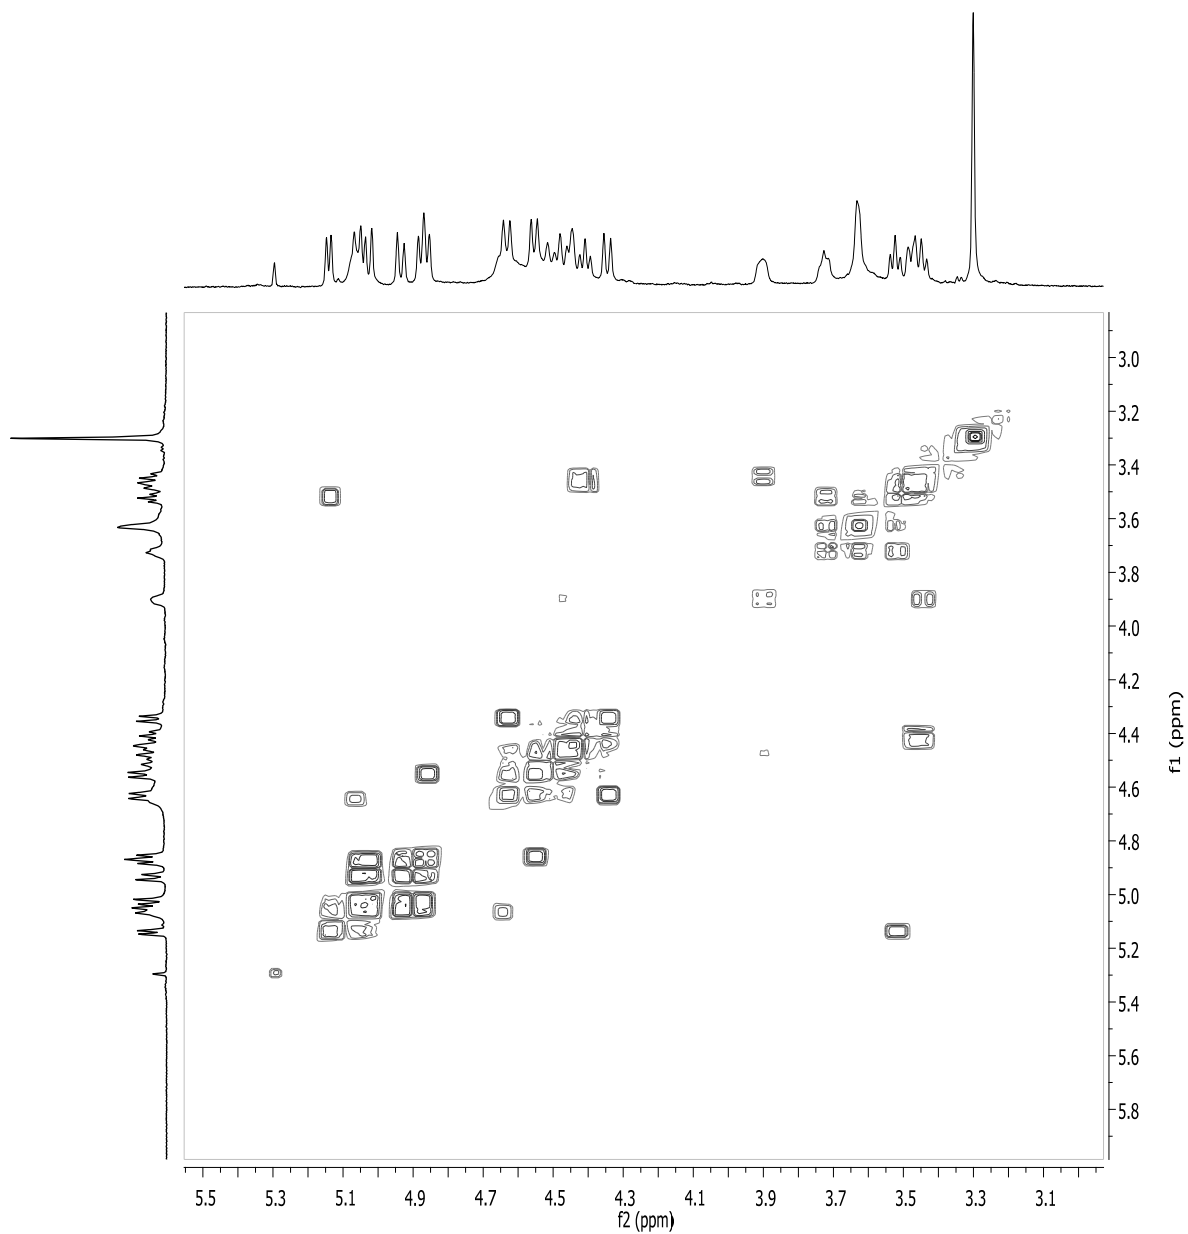

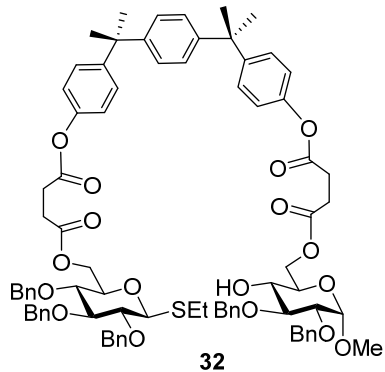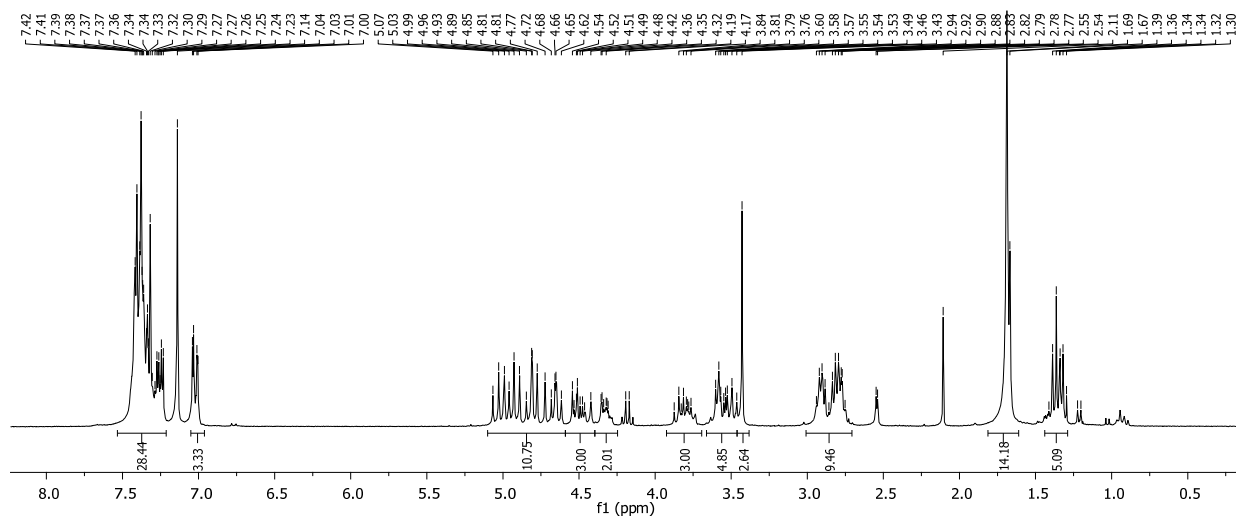

CDCl<sub>3</sub> at 300 MHz

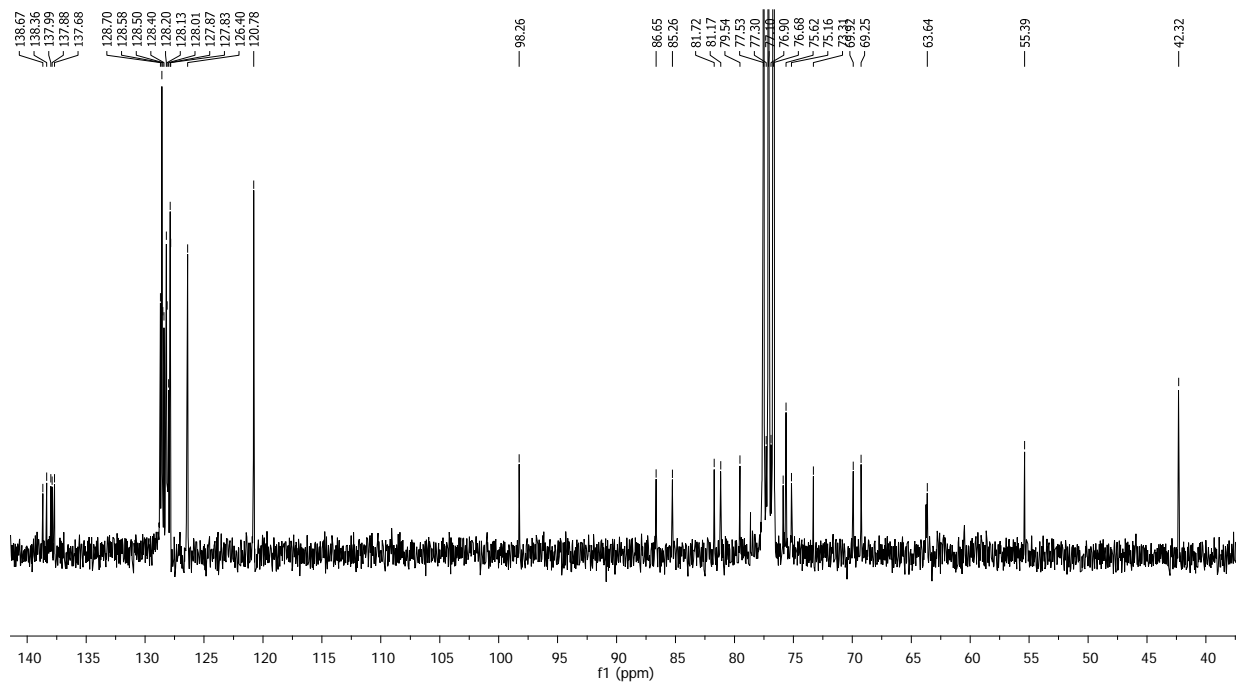

CDCl<sub>3</sub> at 75 MHz

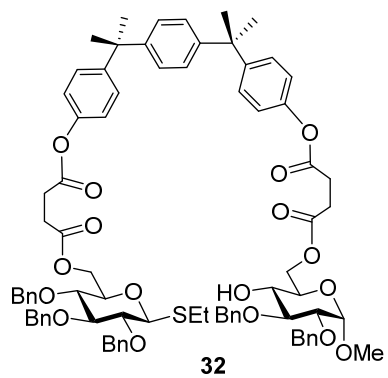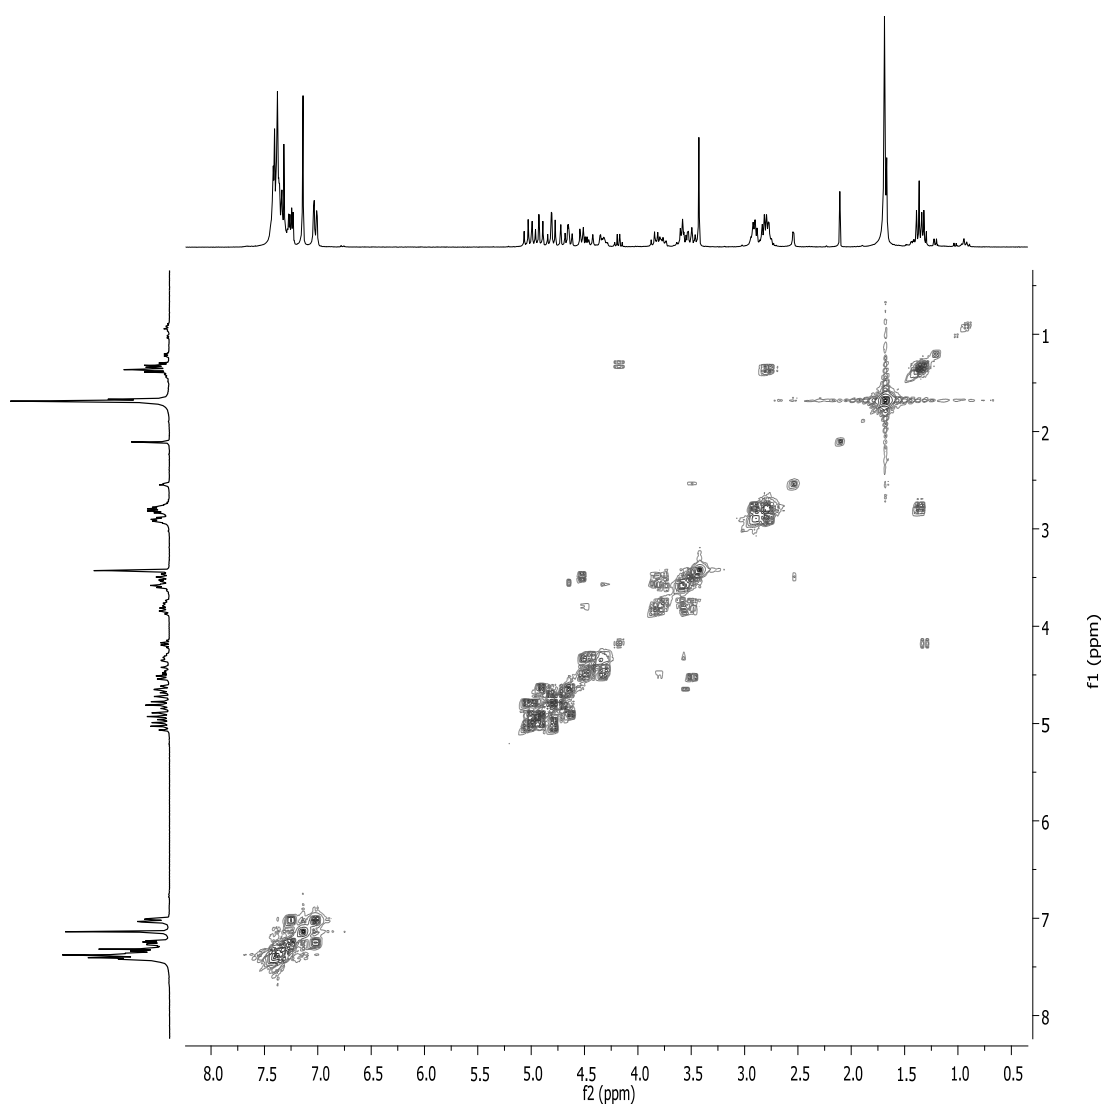

CDCl<sub>3</sub> at 300 MHz

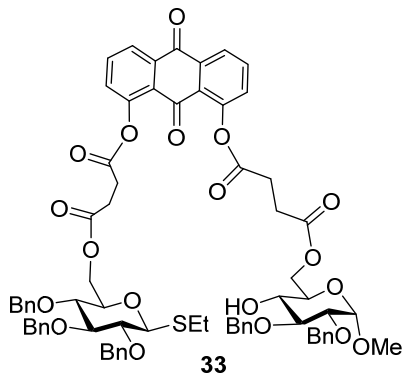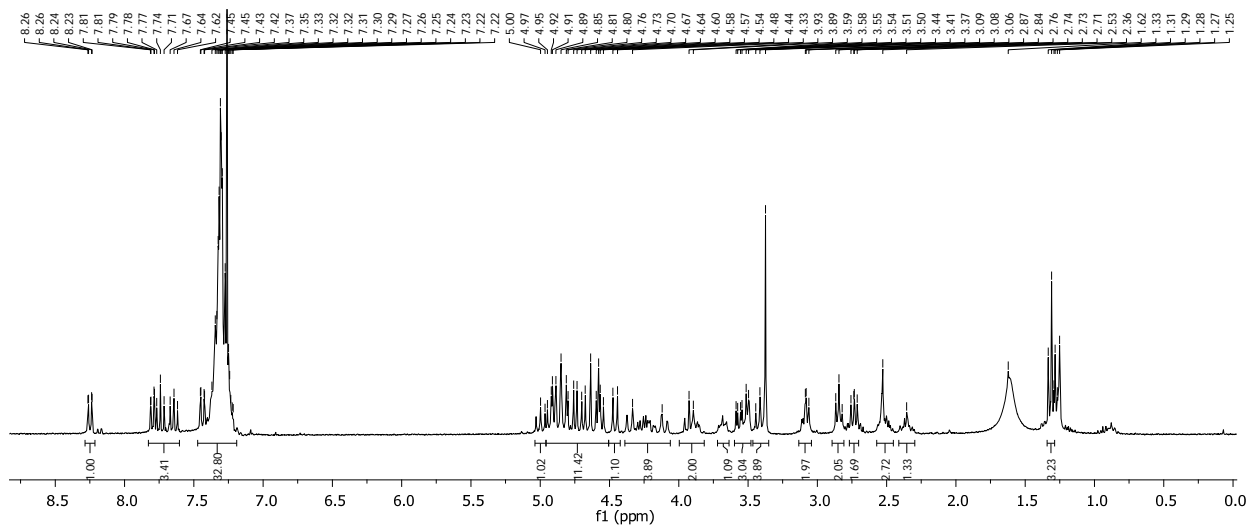

CDCl<sub>3</sub> at 300 MHz

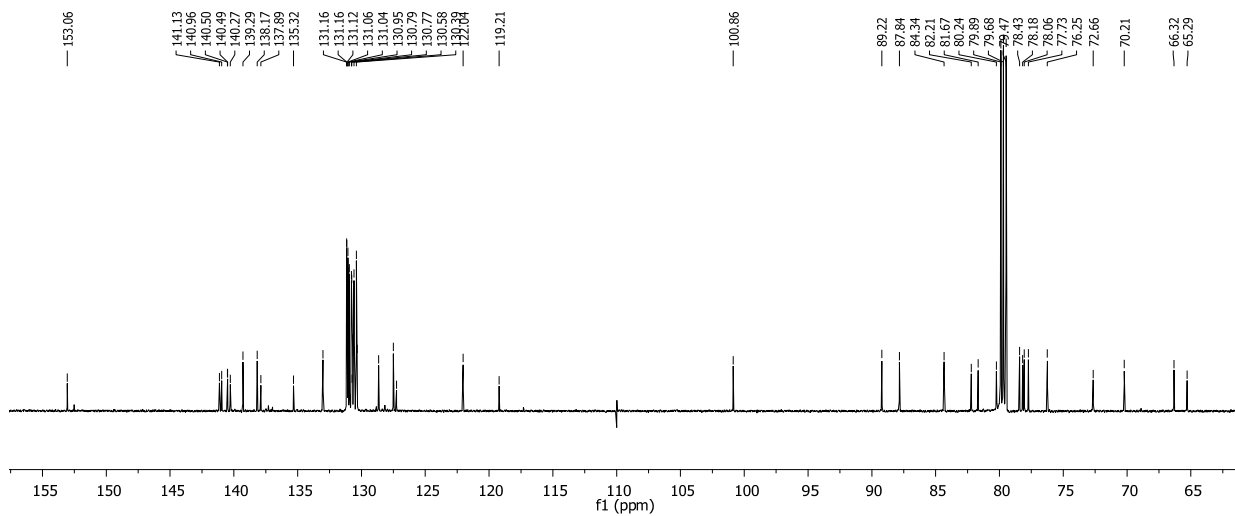

CDCl<sub>3</sub> at 150 MHz

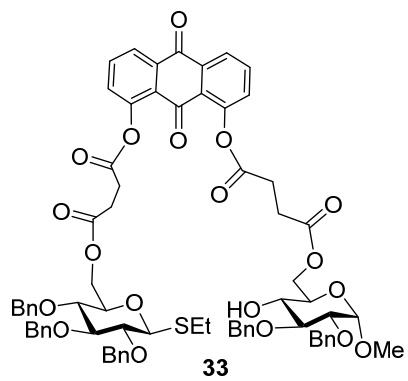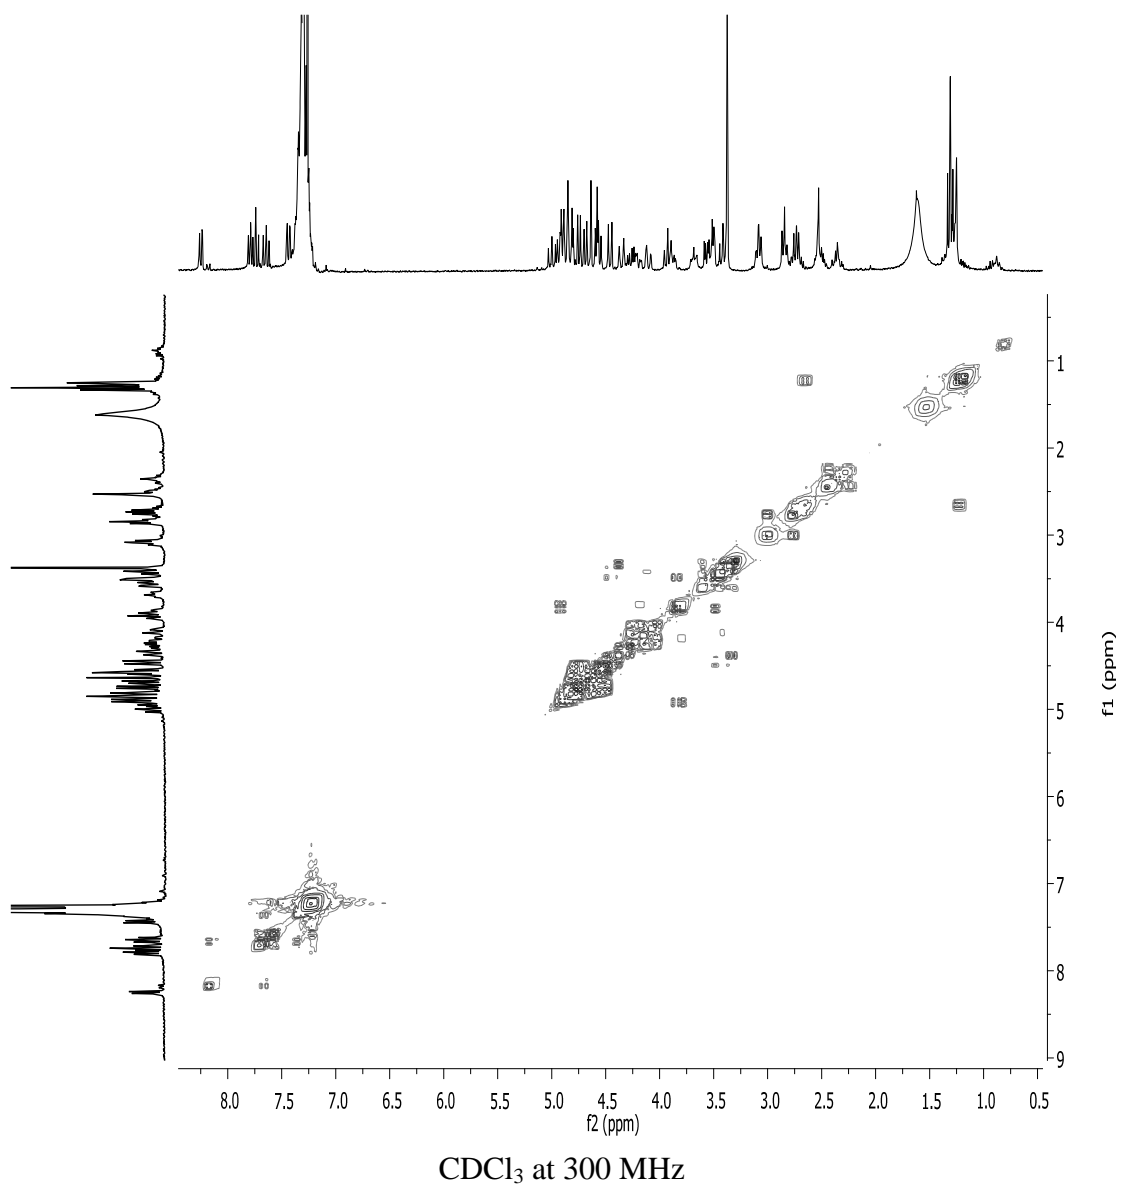

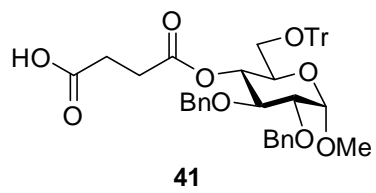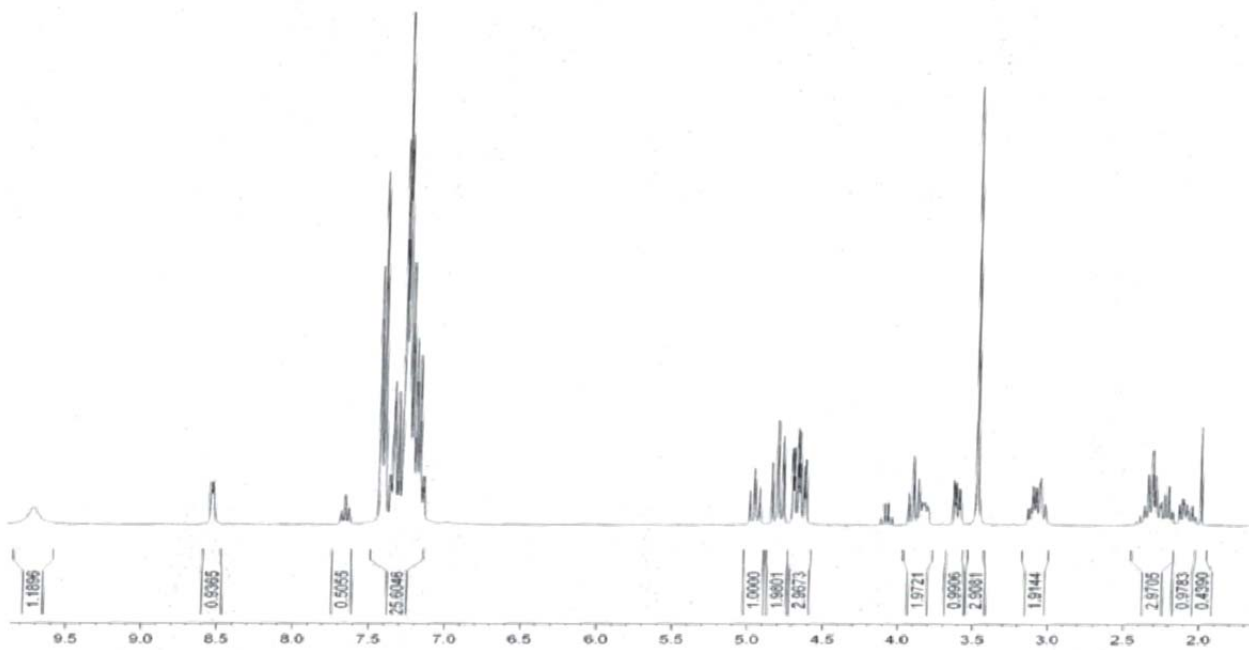

$\text{CDCl}_3$  at 300 MHz

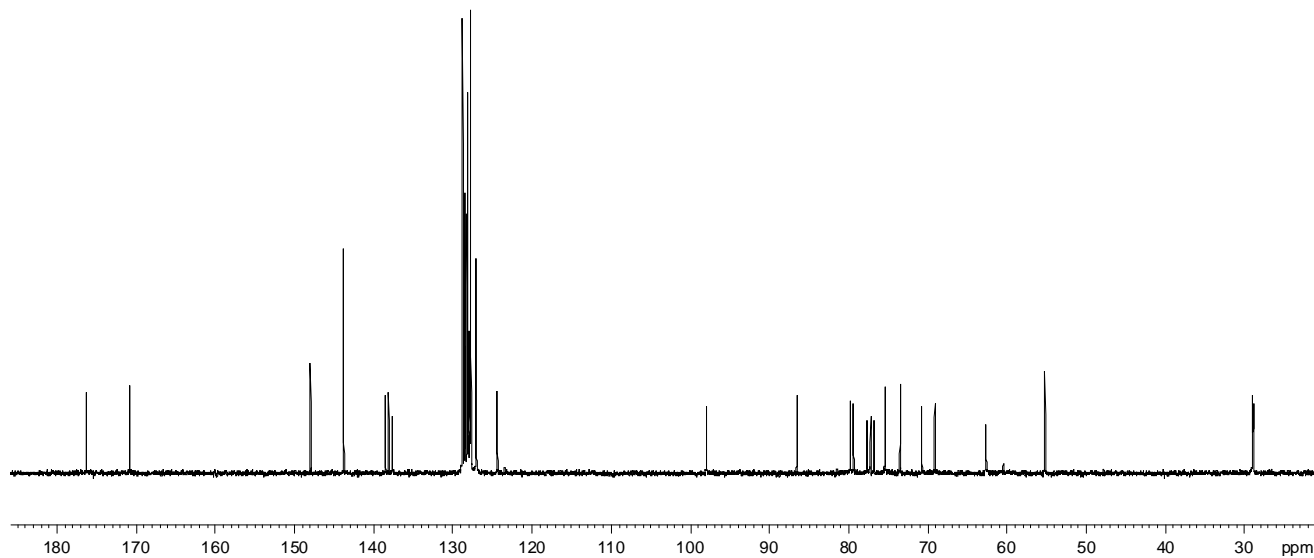

$\text{CDCl}_3$  at 75 MHz

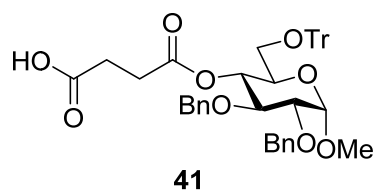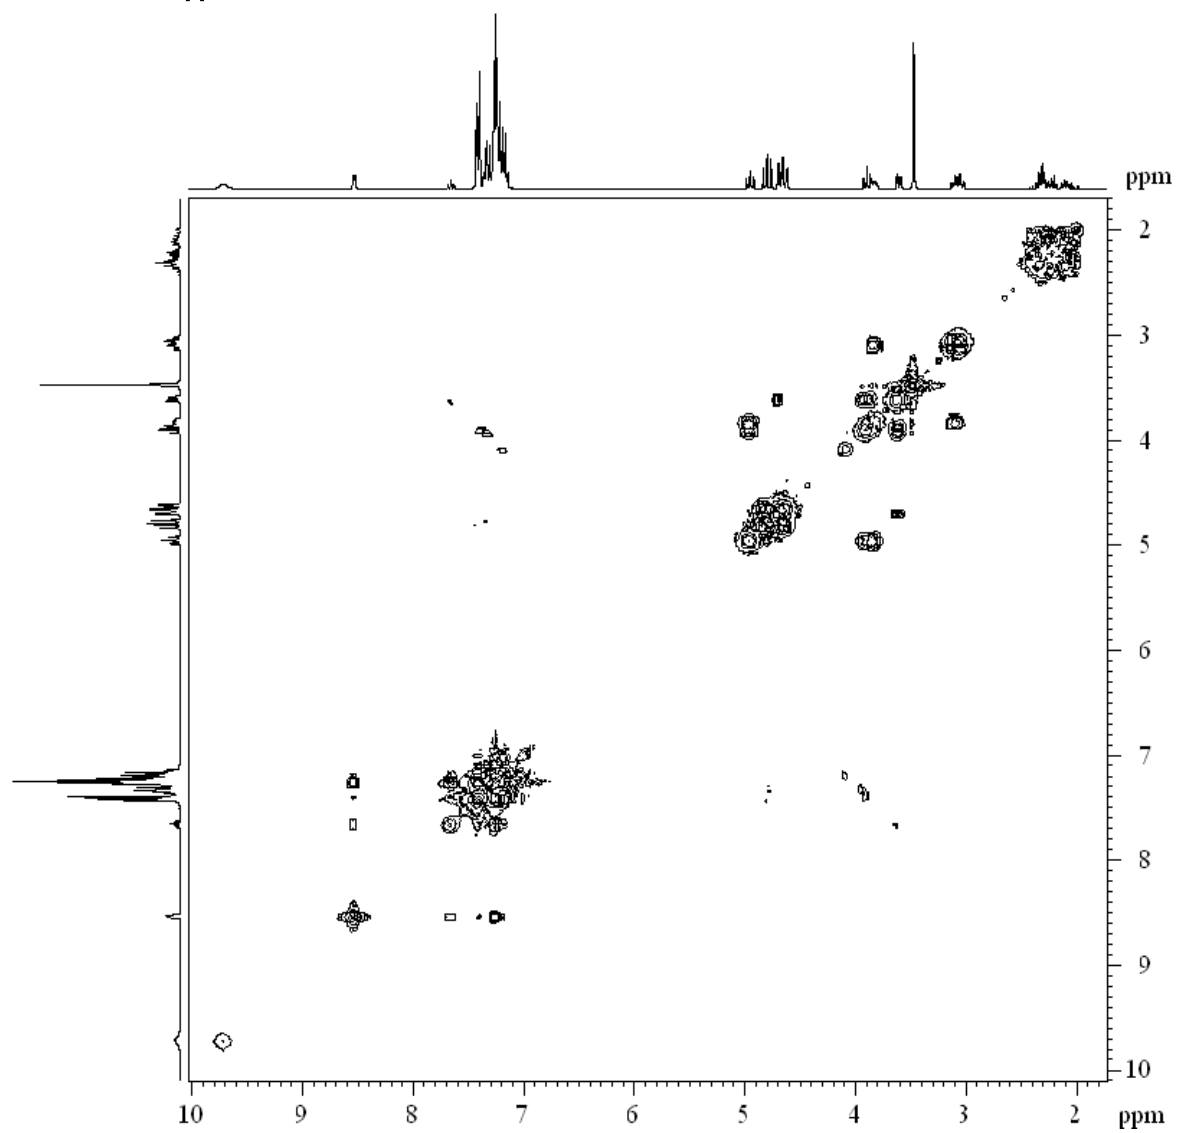

CDCl<sub>3</sub> at 300 MHz

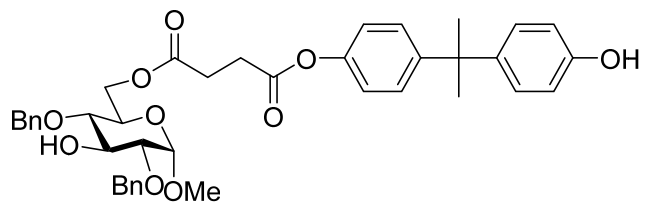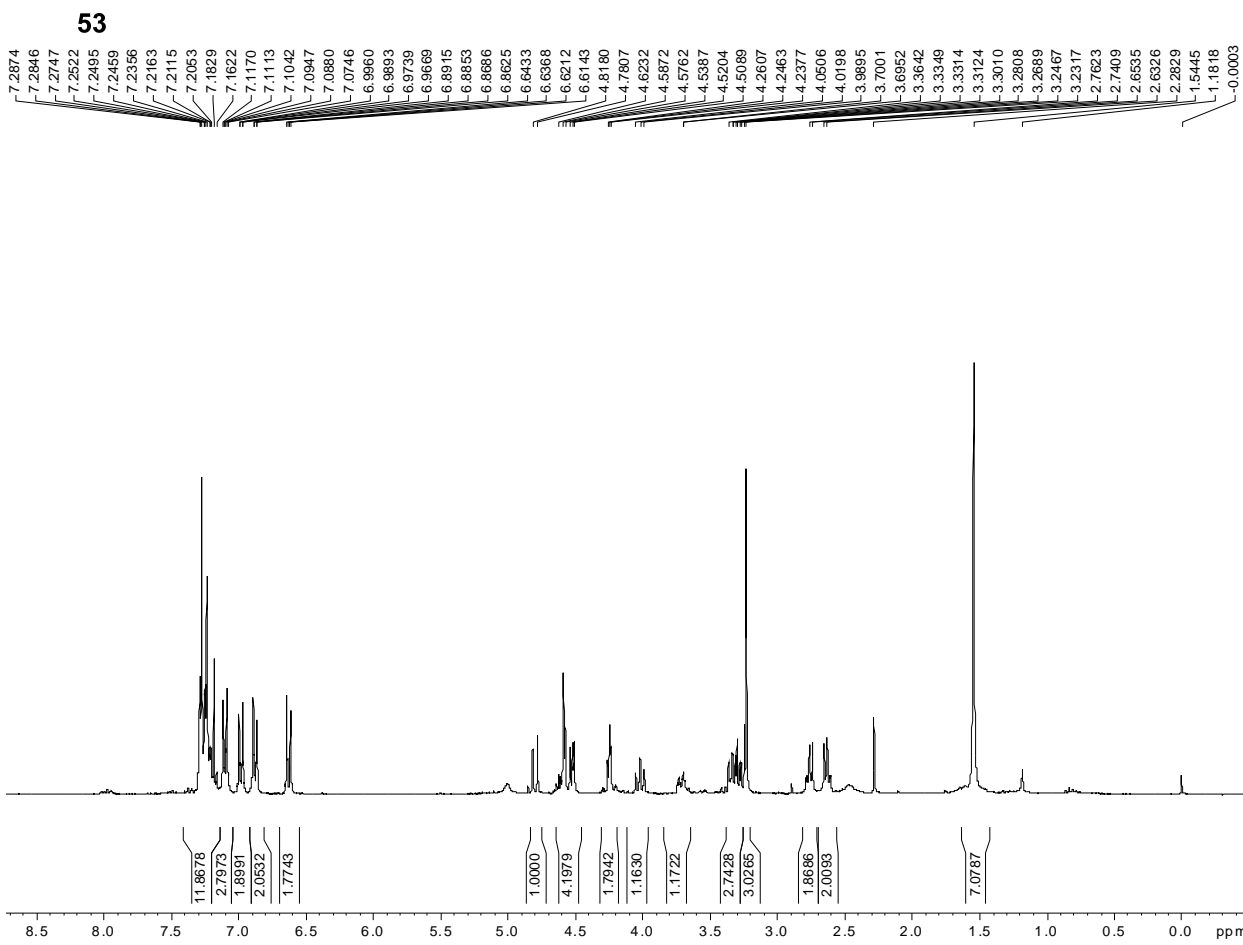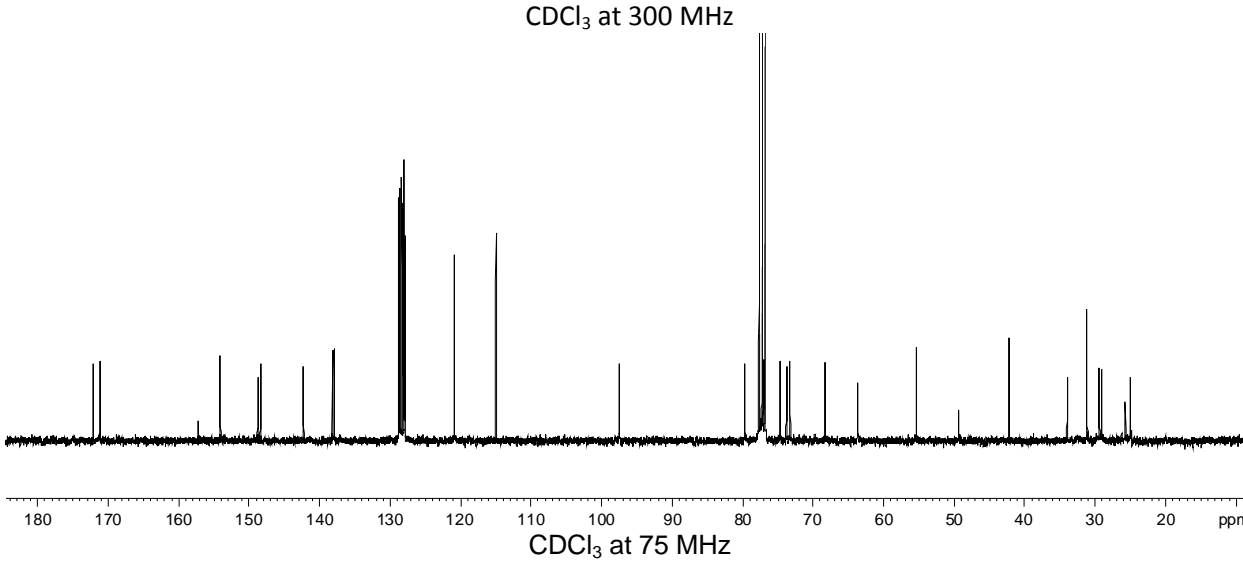





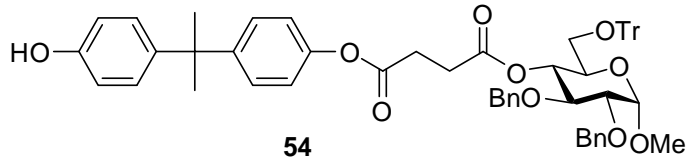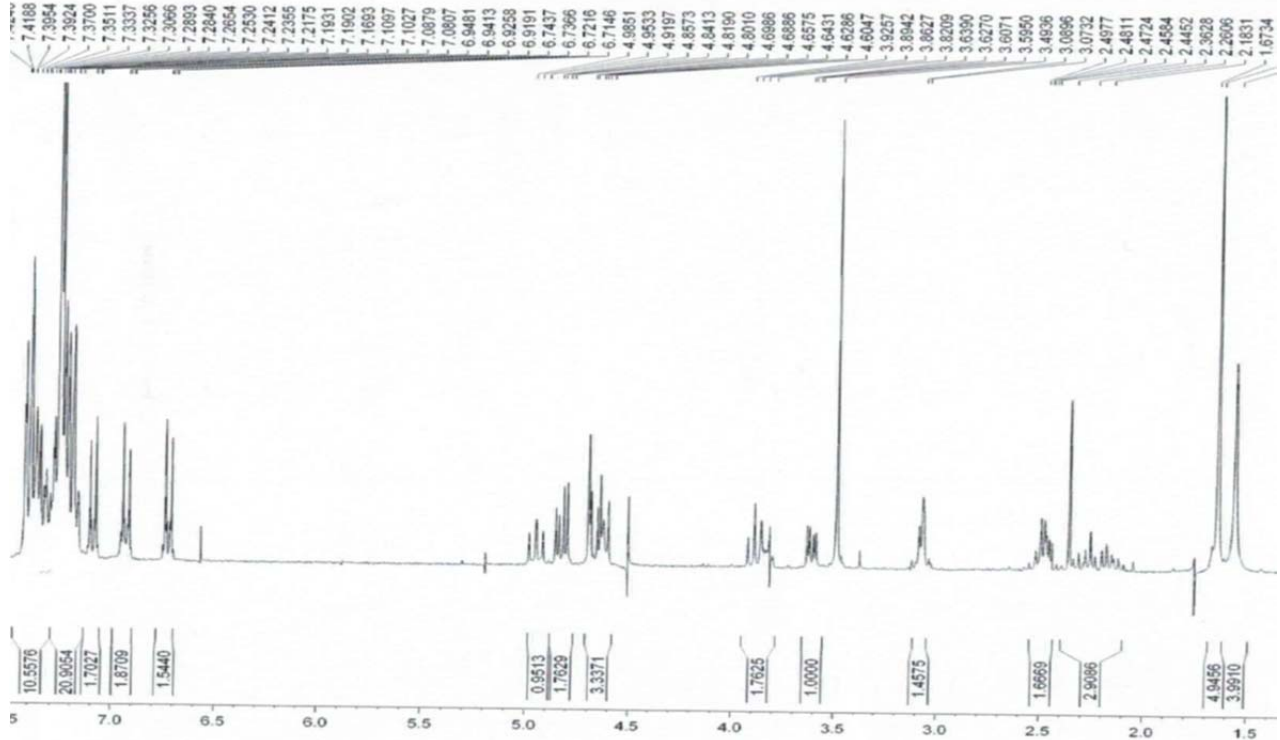

CDCl<sub>3</sub> at 300 MHz

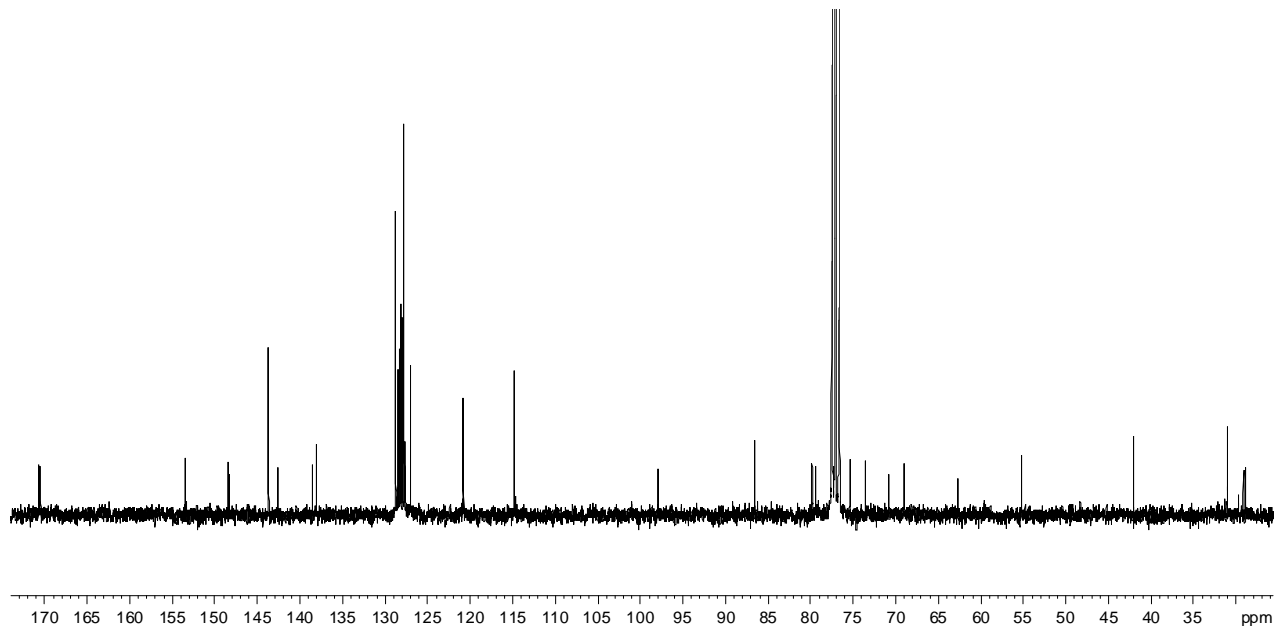

CDCl<sub>3</sub> at 75 MHz



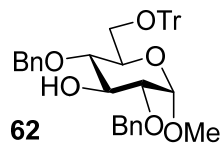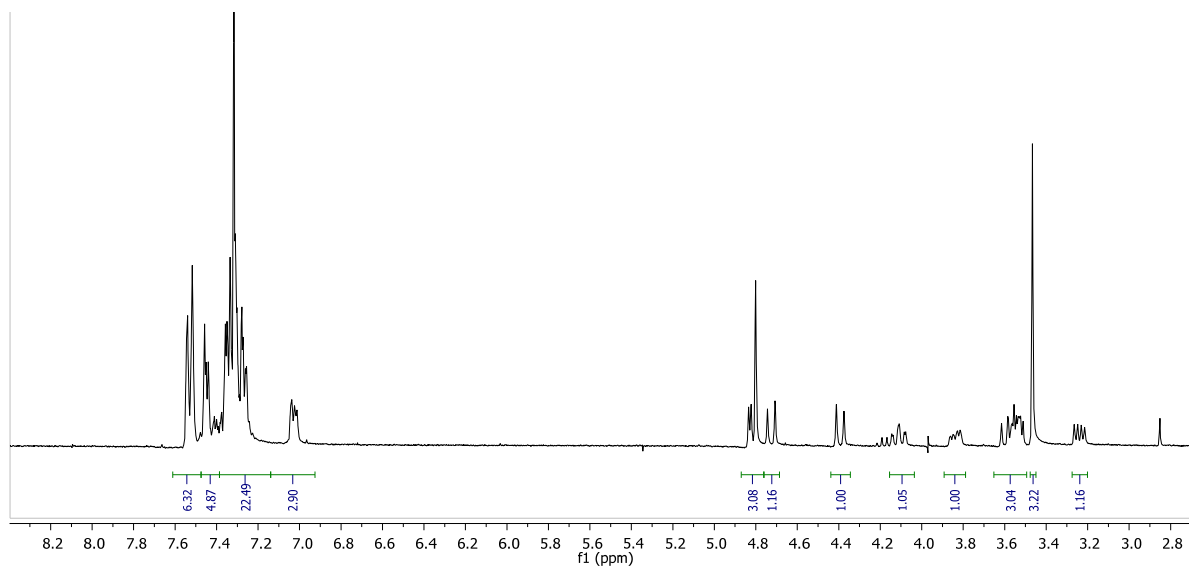

$\text{CDCl}_3$  at 300 MHz

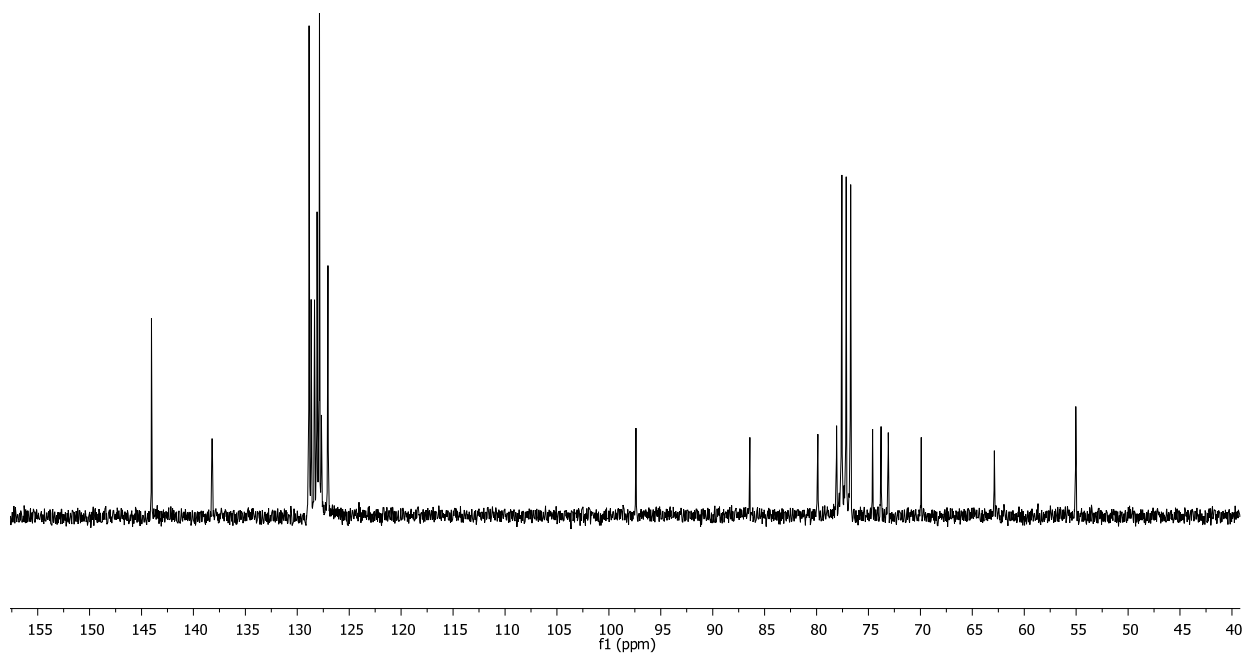

$\text{CDCl}_3$  at 75 MHz

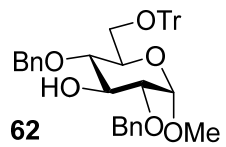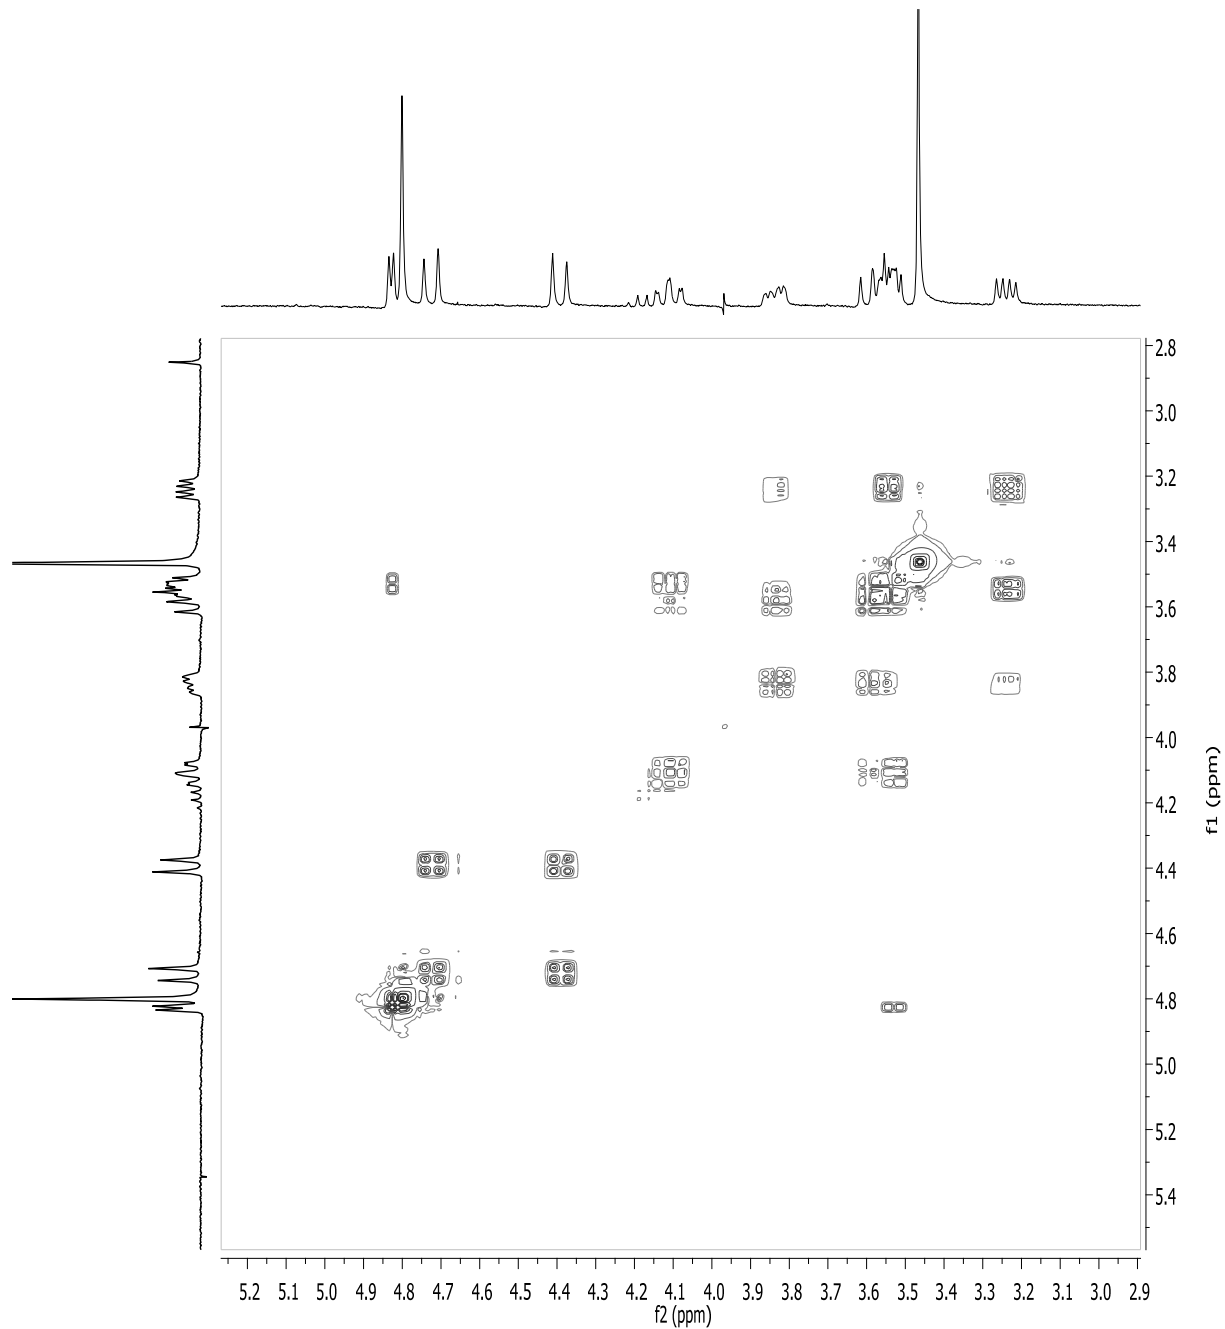

CDCl<sub>3</sub> at 300 MHz

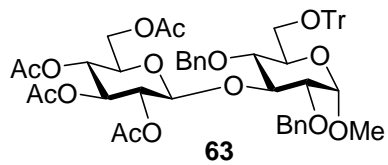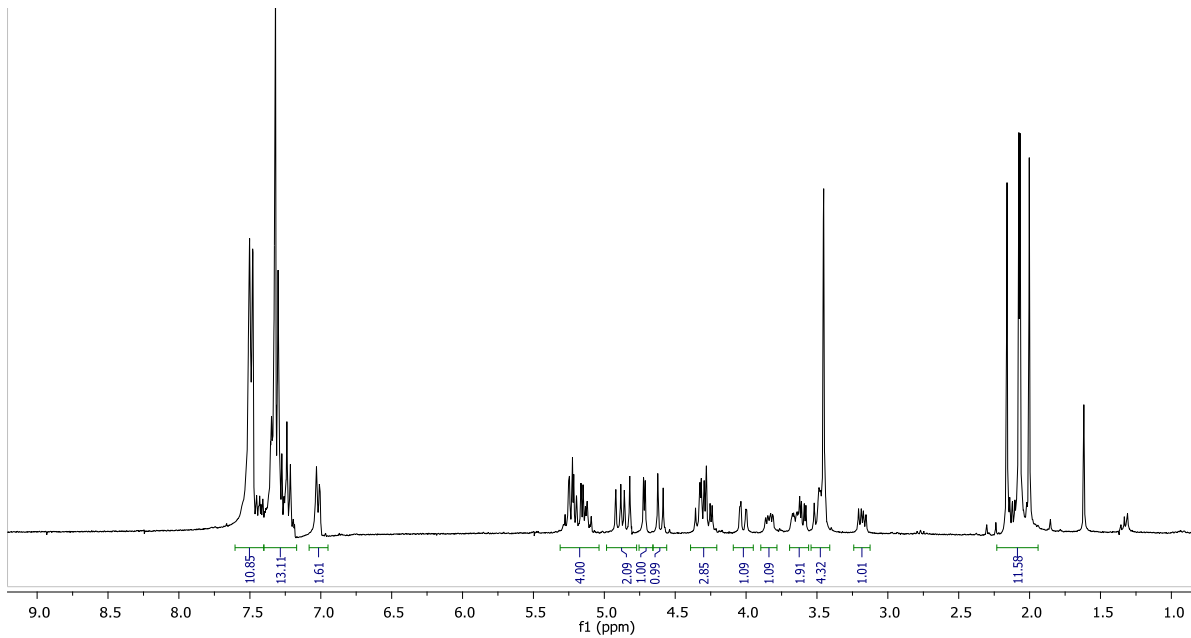

$\text{CDCl}_3$  at 300 MHz

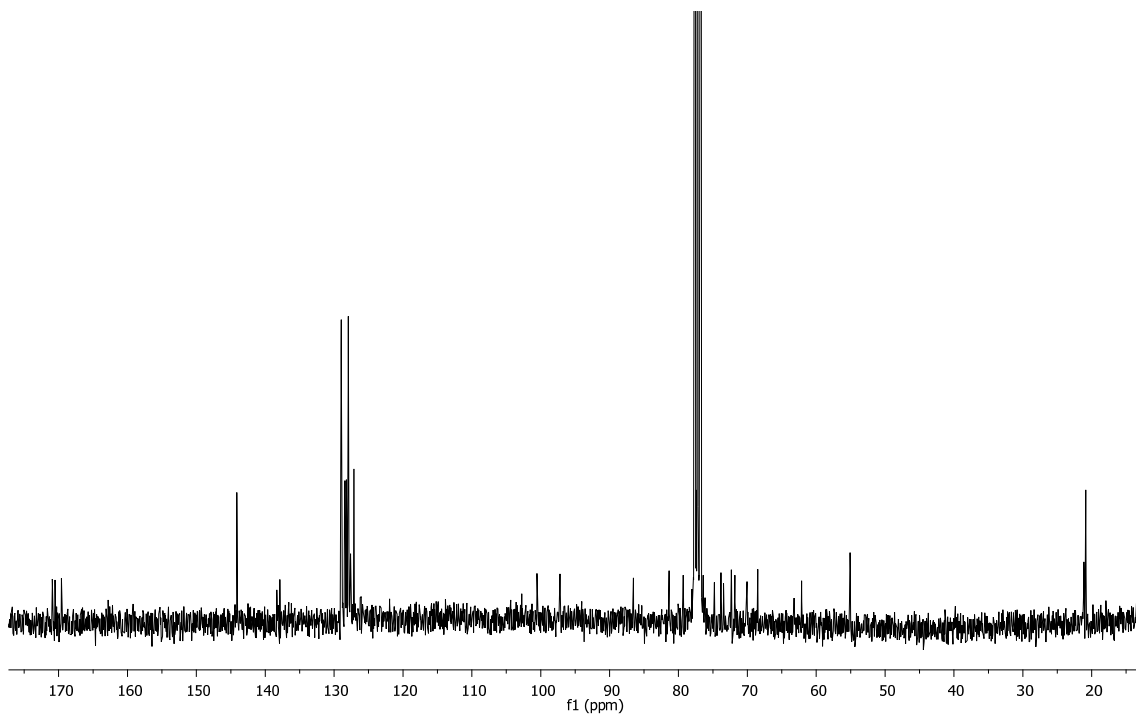

$\text{CDCl}_3$  at 75 MHz



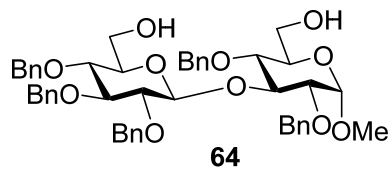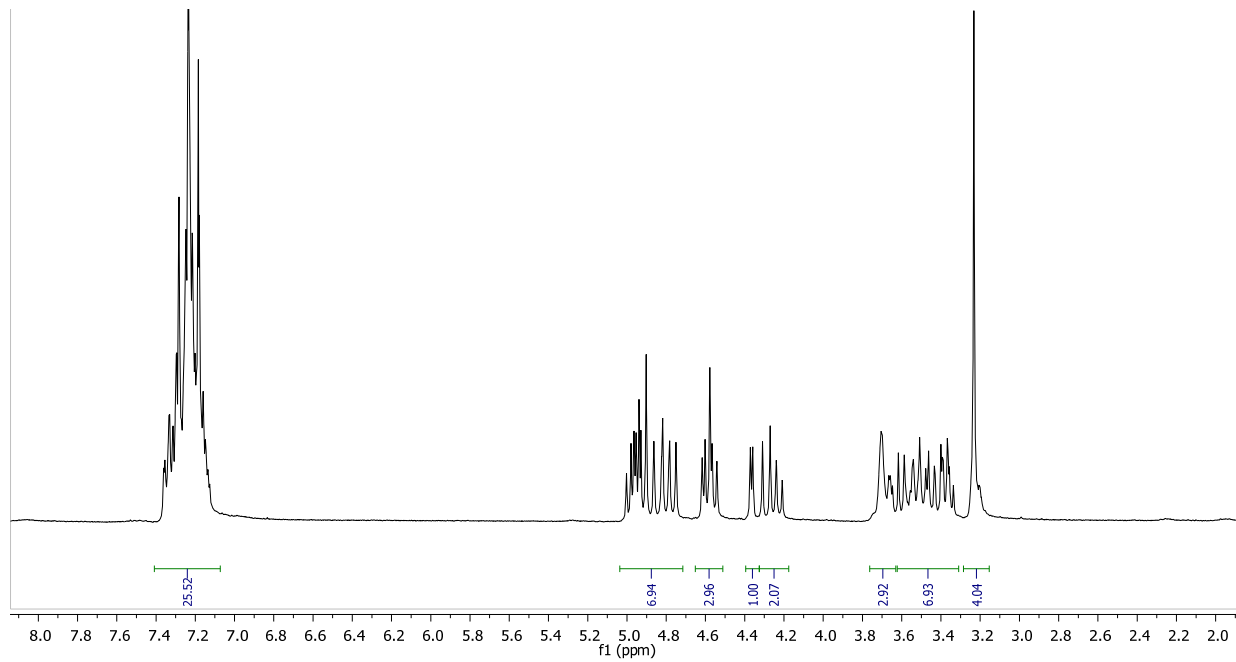

CDCl<sub>3</sub> at 300 MHz

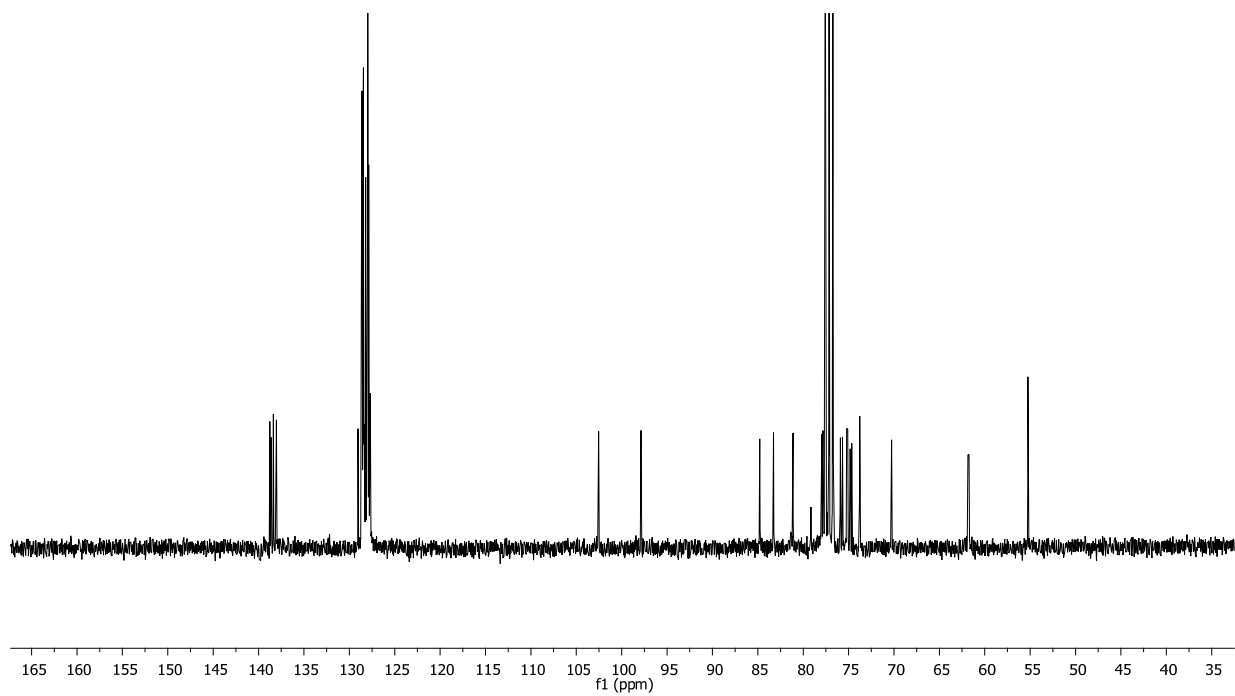

CDCl<sub>3</sub> at 75 MHz



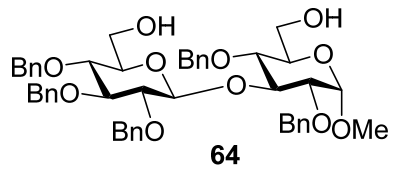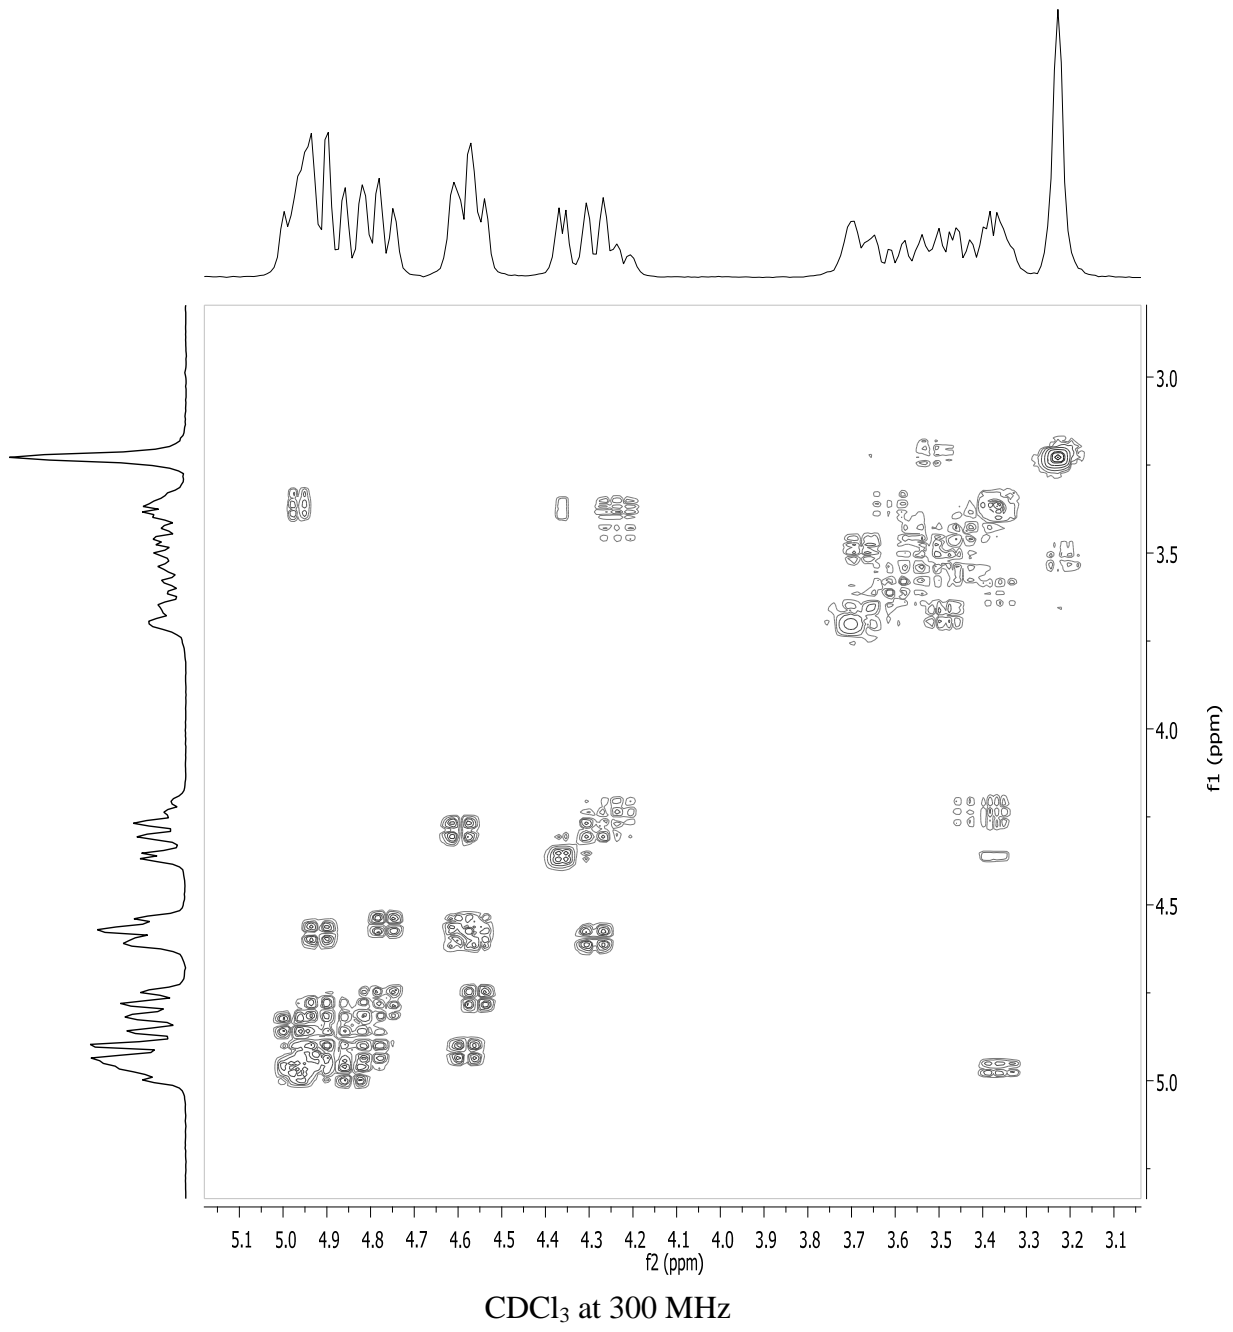

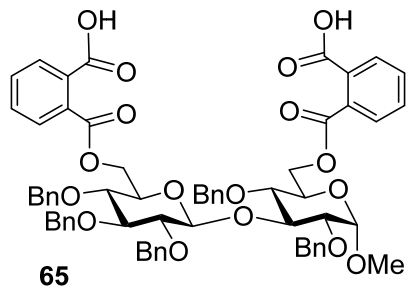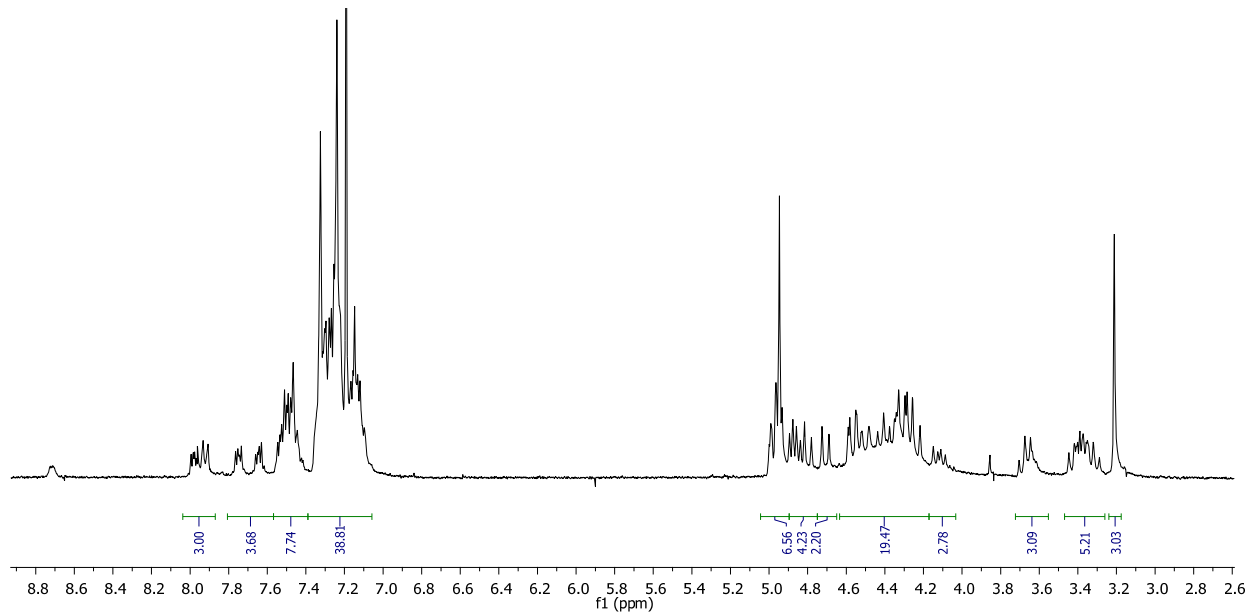

CDCl<sub>3</sub> at 300 MHz

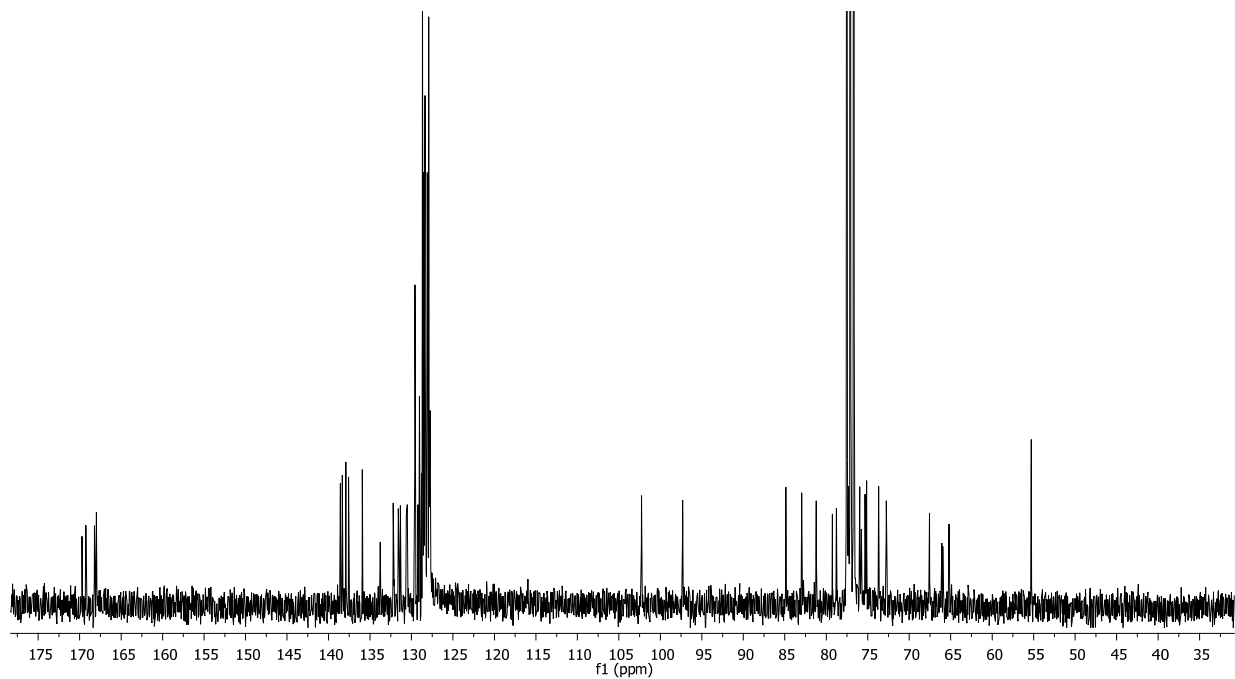

CDCl<sub>3</sub> at 75 MHz

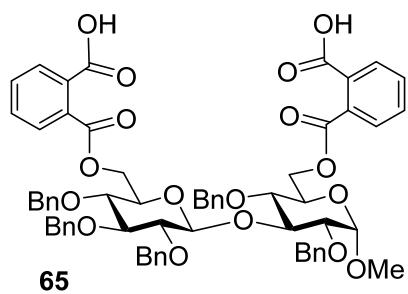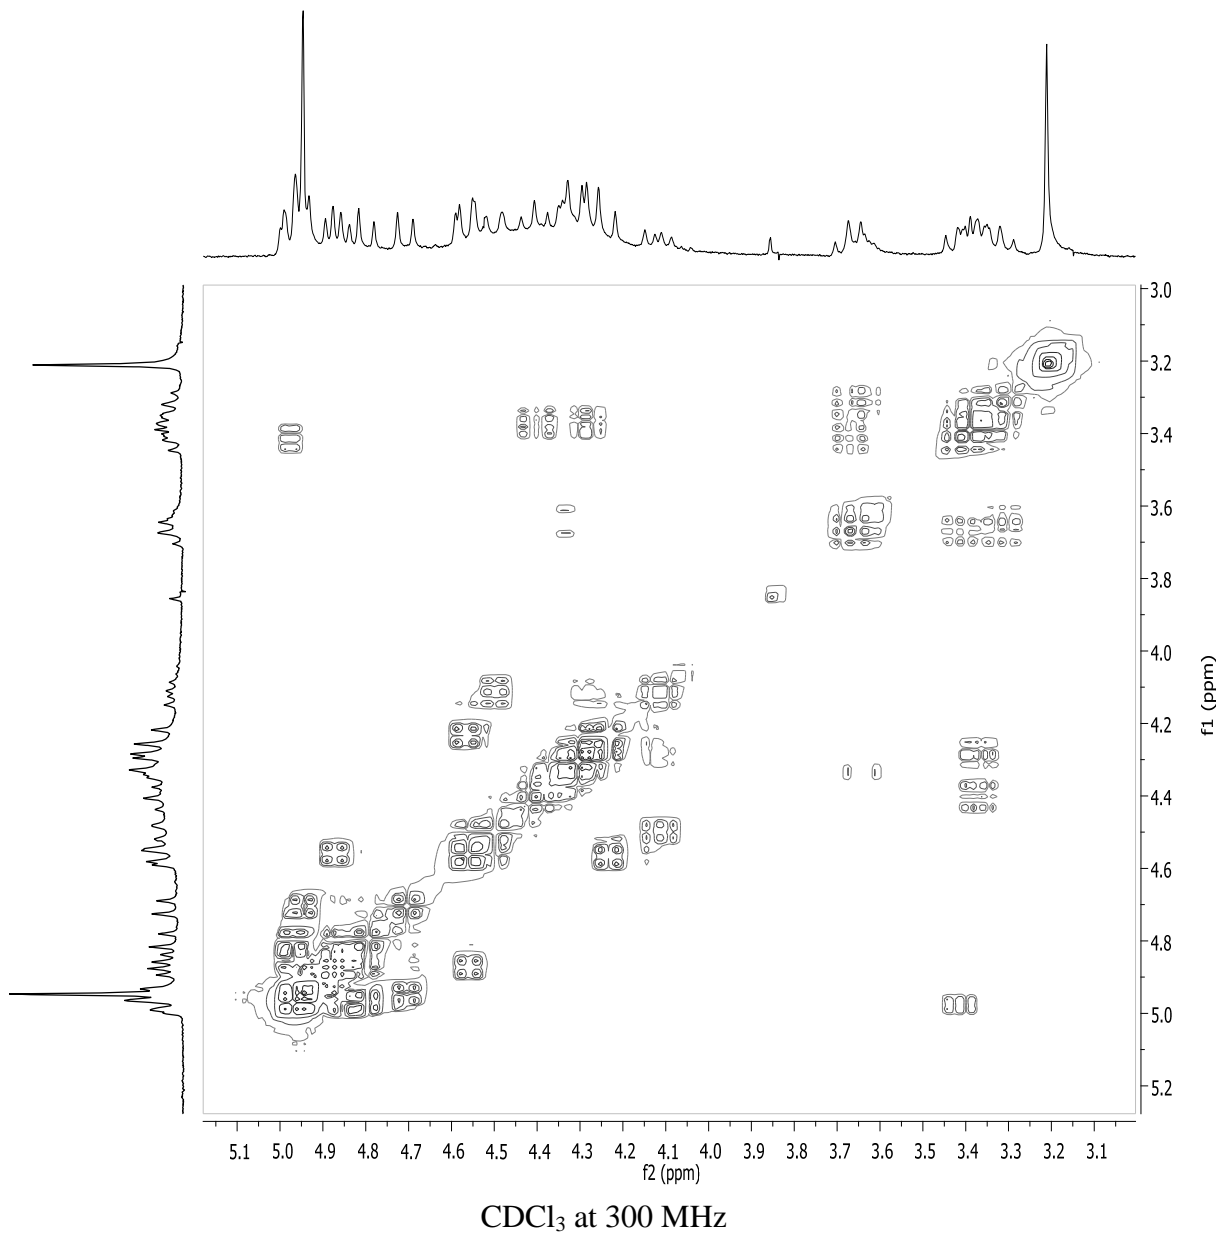

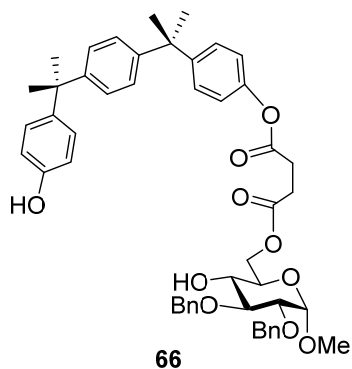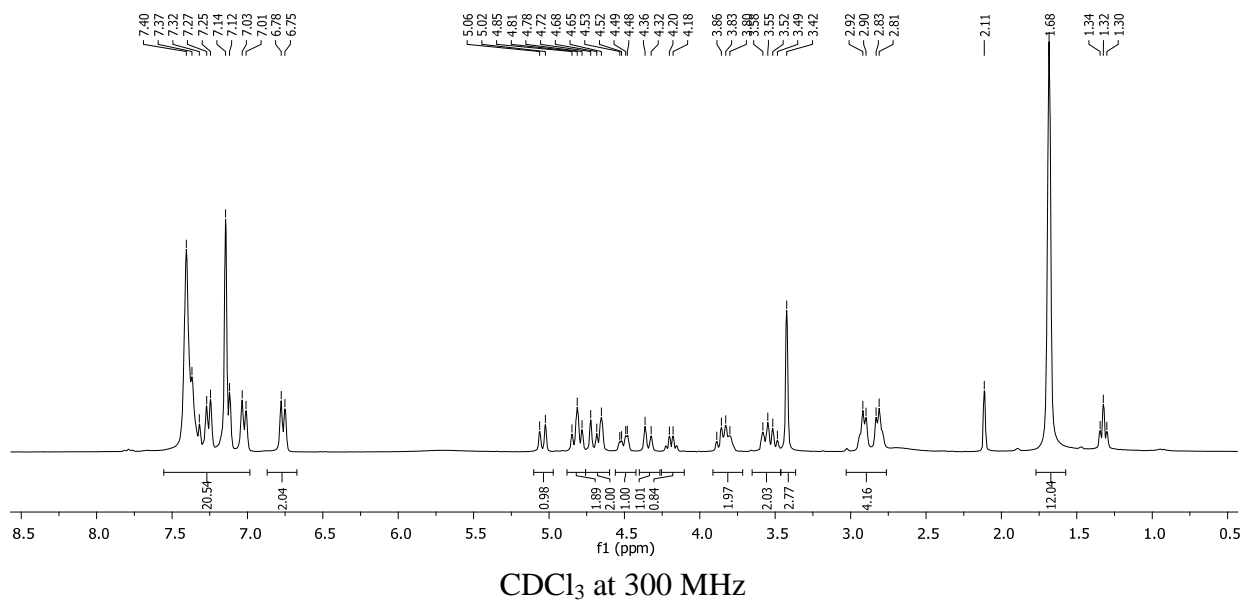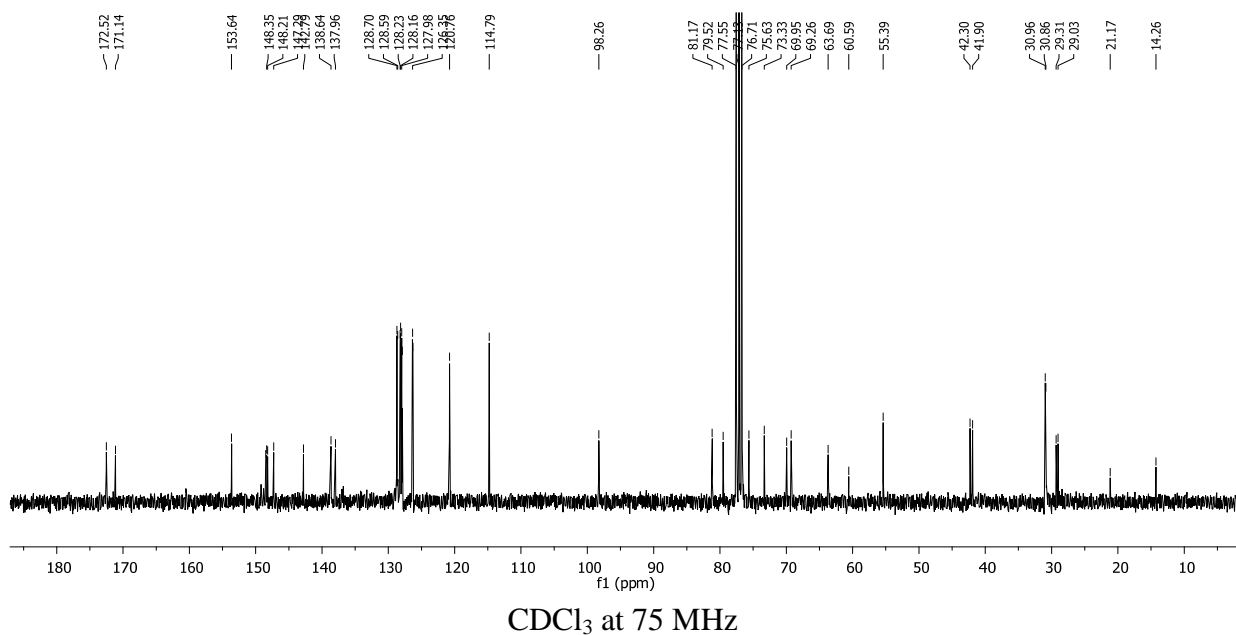



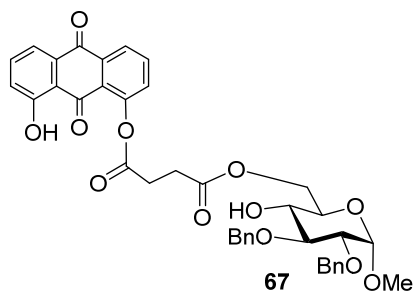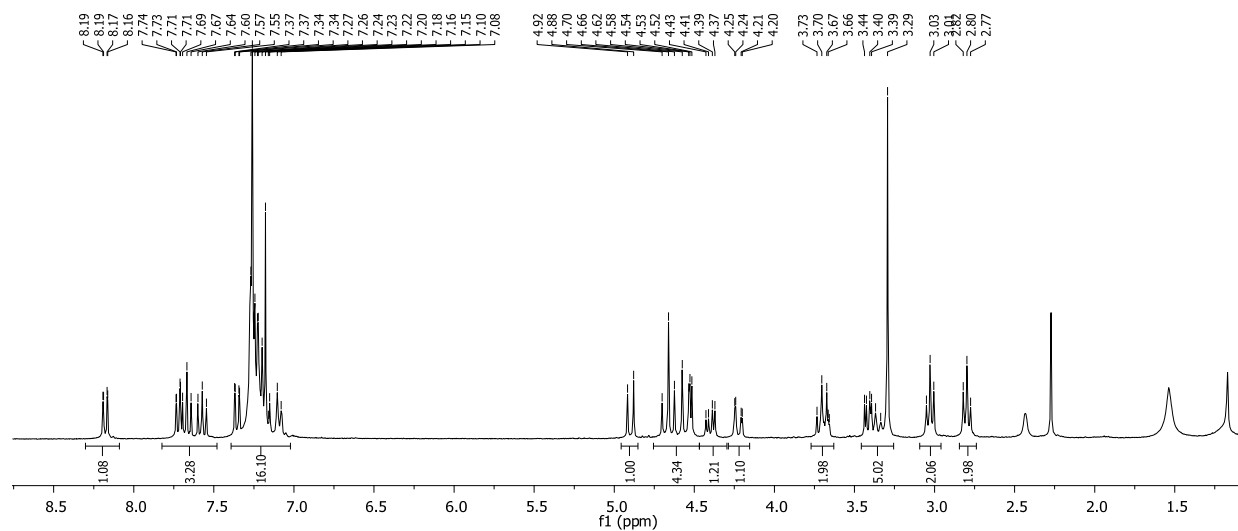

CDCl<sub>3</sub> at 300 MHz

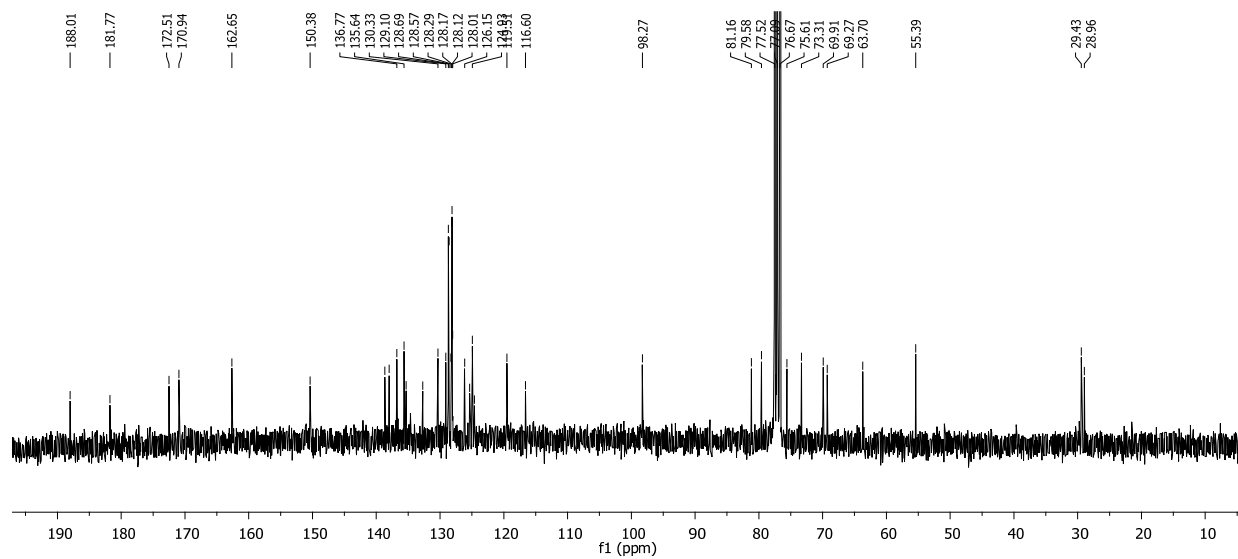

CDCl<sub>3</sub> at 75 MHz

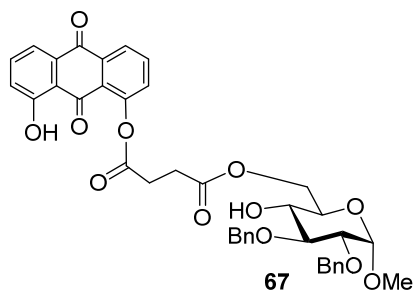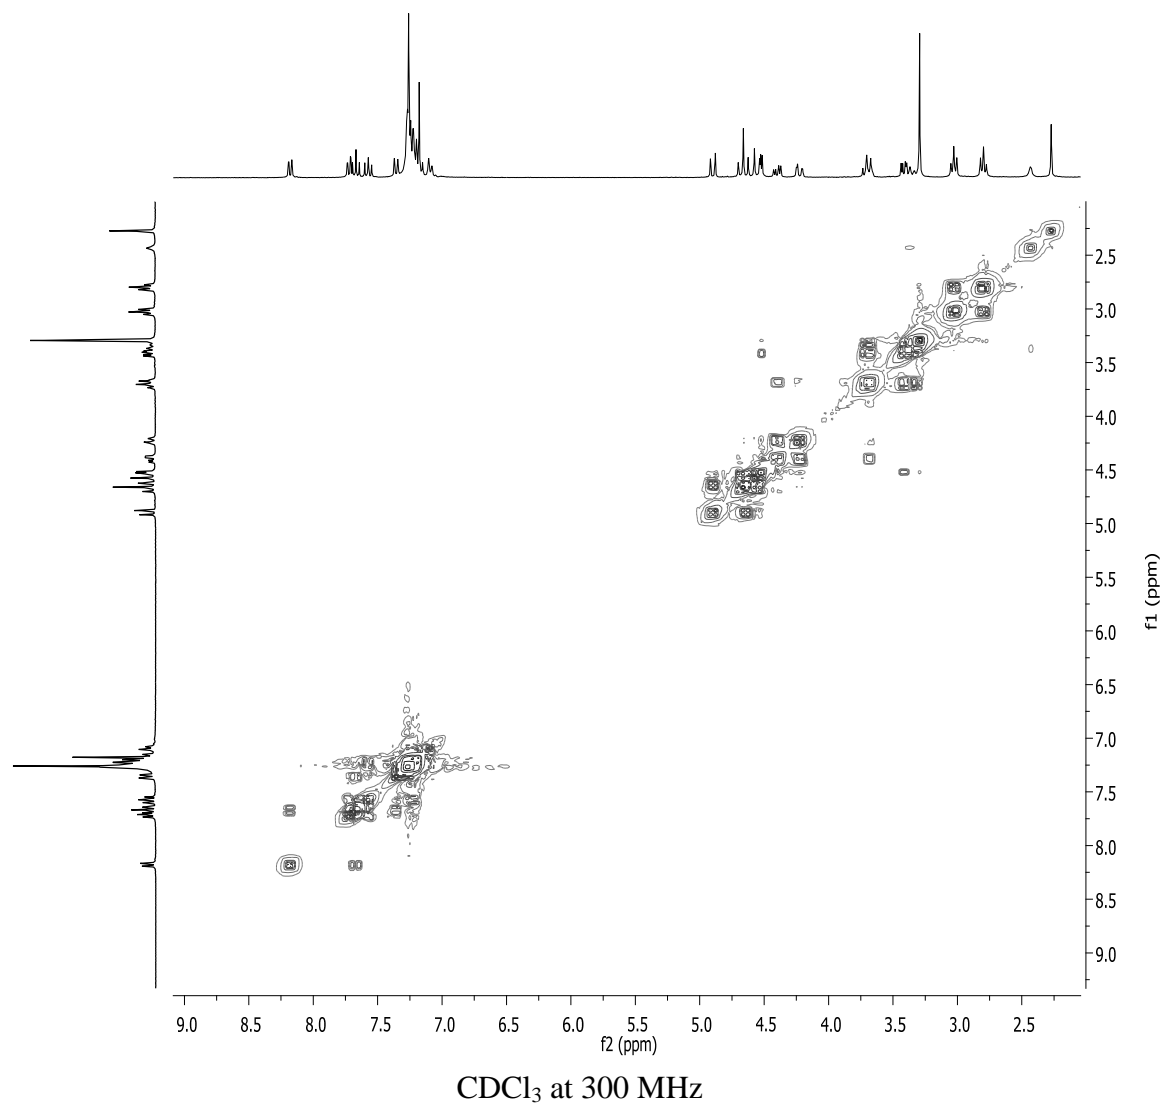

Supplement: NIHMS867356-supplement-si.pdf [file NIHMS867356-supplement-si.pdf]
